# Supplementary material for: Occupational Burnout and Job Satisfaction Among Physicians in Times of COVID-19 Crisis: A Convergent Parallel Mixed-Method Study
Source: Research Square preprint supplement (doi:10.21203/rs.3.rs-121781/v1), 2020-12-18
Supplement: Supplementary file 1 [file a93ad7f81c37d78e543d5a4e.xlsx]

## Sheet: Form responses 1
AGE	GENDER	MARITAL STATUS	HOUSEHOLD	RESIDENCE TYPE	REGION	SMOKING	SPECIALTY	CLASSIFICATION	WORKPLACE	JOB STATUS	MONTHLY SALARY	DUTY HOURS/WEEK	NIGHT SHIFTS/WEEK	SUFFICIENT PPE	COVID-19 INCENTIVES	COVID-19 STATUS	Burnout Q1	Burnout Q2	Burnout Q3	Burnout Q4	Burnout Q5	Burnout Q6	Burnout Q7	Burnout Q8	Burnout Q9	Burnout Q10	Job Satisfaction Q1	Job Satisfaction Q2	Job Satisfaction Q3	Job Satisfaction Q4	Job Satisfaction Q5
42	Male	Married	4-6 Persons	Owned Falt/House	Central (Amman, Zarqa, Madaba, Al-Balqaa)	Non-smoker	Medical	Consultant	Jordanian Royal Medical Services	Full-Time	>1400 JDs	<40	0	Yes	No	No	Sometimes	Sometimes	Rarely	Rarely	Rarely	Sometimes	Rarely	Rarely	Rarely	Rarely	Agree	Agree	Disagree	Agree	Disagree
30	Male	Married	1-3 Persons	Owned Falt/House	North (Irbid, Ajloun, Jerash, Mafraq)	Smoker	Medical	Resident	Jordanian Royal Medical Services	Full-Time	700-1400 JDs	40-48	>3	Yes	Yes	No	Often	Never	Never	Rarely	Never	Rarely	Sometimes	Never	Sometimes	Very Often	Strongly Agree	Agree	Disagree	Agree	Disagree
38	Male	Married	1-3 Persons	Rented Falt/House	Central (Amman, Zarqa, Madaba, Al-Balqaa)	Smoker	Medical	Specialist	Jordanian Royal Medical Services	Full-Time	700-1400 JDs	40-48	1-3 on-calls	No	No	No	Always	Often	Sometimes	Sometimes	Rarely	Sometimes	Almost Never	Almost Never	Sometimes	Sometimes	Strongly disagree	Neutral/Undecided	Agree	Disagree	Agree
37	Male	Married	4-6 Persons	Rented Falt/House	North (Irbid, Ajloun, Jerash, Mafraq)	Non-smoker	Medical	Specialist	Jordanian Royal Medical Services	Part-Time	700-1400 JDs	<40	1-3 on-calls	No	No	No	Rarely	Often	Often	Sometimes	Sometimes	Rarely	Rarely	Never	Rarely	Never	Strongly Agree	Strongly Agree	Strongly disagree	Strongly agree	Strongly disagree
39	Male	Married	4-6 Persons	Owned Falt/House	North (Irbid, Ajloun, Jerash, Mafraq)	Smoker	Surgical	Specialist	Jordanian Royal Medical Services	Full-Time	>1400 JDs	<40	1-3 on-calls	Yes	No	No	Sometimes	Often	Always	Very Often	Sometimes	Always	Sometimes	Very Often	Often	Always	Strongly disagree	Strongly disagree	Neutral/Undecided	Strongly disagree	Strongly agree
30	Male	Married	1-3 Persons	Rented Falt/House	North (Irbid, Ajloun, Jerash, Mafraq)	Smoker	Medical	Resident	Jordanian Ministry of Health	Full-Time	700-1400 JDs	40-48	1-3 on-calls	Yes	No	Yes	Always	Always	Always	Often	Often	Often	Never	Never	Often	Rarely	Neutral/undecided	Neutral/Undecided	Disagree	Agree	Neutral/Undecided
42	Male	Married	4-6 Persons	Owned Falt/House	Central (Amman, Zarqa, Madaba, Al-Balqaa)	Smoker	Medical	Specialist	Jordanian Ministry of Health	Full-Time	700-1400 JDs	40-48	1-3 on-calls	Yes	No	No	Very Often	Very Often	Often	Very Often	Sometimes	Very Often	Sometimes	Often	Very Often	Sometimes	Disagree	Neutral/Undecided	Agree	Disagree	Neutral/Undecided
33	Male	Married	4-6 Persons	Rented Falt/House	North (Irbid, Ajloun, Jerash, Mafraq)	Non-smoker	Medical	Specialist	Jordanian Ministry of Health	Full-Time	700-1400 JDs	40-48	>3	Yes	No	No	Very Often	Often	Rarely	Sometimes	Never	Very Often	Never	Rarely	Always	Very Often	Neutral/undecided	Neutral/Undecided	Neutral/Undecided	Agree	Disagree
28	Male	Single	1-3 Persons	Rented Falt/House	Central (Amman, Zarqa, Madaba, Al-Balqaa)	Smoker	Medical	Resident	Jordanian Ministry of Health	Part-Time	<700 JDs	40-48	1-3 on-calls	Yes	No	No	Often	Very Often	Often	Very Often	Never	Almost Never	Rarely	Never	Rarely	Never	Agree	Agree	Neutral/Undecided	Agree	Disagree
32	Male	Married	1-3 Persons	Owned Falt/House	Central (Amman, Zarqa, Madaba, Al-Balqaa)	Smoker	Medical	Specialist	Jordanian Royal Medical Services	Full-Time	700-1400 JDs	<40	1-3 on-calls	No	No	No	Sometimes	Sometimes	Never	Never	Never	Never	Never	Sometimes	Often	Sometimes	Neutral/undecided	Agree	Disagree	Agree	Strongly disagree
44	Male	Married	4-6 Persons	Owned Falt/House	Central (Amman, Zarqa, Madaba, Al-Balqaa)	Smoker	Medical	Consultant	Jordanian Royal Medical Services	Full-Time	>1400 JDs	<40	1-3 on-calls	Yes	No	No	Sometimes	Sometimes	Sometimes	Sometimes	Often	Sometimes	Often	Rarely	Sometimes	Rarely	Neutral/undecided	Neutral/Undecided	Neutral/Undecided	Neutral/Undecided	Neutral/Undecided
34	Male	Married	4-6 Persons	Owned Falt/House	North (Irbid, Ajloun, Jerash, Mafraq)	Non-smoker	Medical	Specialist	Jordanian Ministry of Health	Full-Time	>1400 JDs	40-48	1-3 on-calls	Yes	No	No	Sometimes	Often	Sometimes	Rarely	Sometimes	Sometimes	Sometimes	Never	Rarely	Sometimes	Disagree	Disagree	Neutral/Undecided	Disagree	Neutral/Undecided
40	Male	Married	4-6 Persons	Owned Falt/House	Central (Amman, Zarqa, Madaba, Al-Balqaa)	Smoker	Surgical	Consultant	Jordanian Royal Medical Services	Full-Time	700-1400 JDs	>48	1-3 on-calls	Yes	No	No	Always	Sometimes	Sometimes	Always	Always	Always	Always	Always	Always	Always	Agree	Neutral/Undecided	Strongly Agree	Neutral/Undecided	Neutral/Undecided
29	Male	Married	1-3 Persons	Owned Falt/House	Central (Amman, Zarqa, Madaba, Al-Balqaa)	Non-smoker	Surgical	Resident	Jordanian Royal Medical Services	Full-Time	<700 JDs	>48	1-3 on-calls	Yes	No	No	Always	Always	Very Often	Very Often	Very Often	Very Often	Very Often	Sometimes	Sometimes	Often	Strongly disagree	Neutral/Undecided	Neutral/Undecided	Agree	Disagree
31	Male	Married	1-3 Persons	Rented Falt/House	Central (Amman, Zarqa, Madaba, Al-Balqaa)	Non-smoker	Surgical	Specialist	Jordanian Royal Medical Services	Full-Time	700-1400 JDs	>48	1-3 on-calls	No	No	No	Often	Very Often	Sometimes	Often	Often	Very Often	Often	Almost Never	Very Often	Very Often	Neutral/undecided	Agree	Neutral/Undecided	Disagree	Neutral/Undecided
32	Male	Married	4-6 Persons	Rented Falt/House	North (Irbid, Ajloun, Jerash, Mafraq)	Non-smoker	Medical	Specialist	Jordanian Royal Medical Services	Part-Time	>1400 JDs	<40	1-3 on-calls	Yes	No	No	Rarely	Sometimes	Never	Rarely	Almost Never	Sometimes	Sometimes	Almost Never	Rarely	Rarely	Agree	Agree	Disagree	Neutral/Undecided	Disagree
36	Male	Married	1-3 Persons	Owned Falt/House	Central (Amman, Zarqa, Madaba, Al-Balqaa)	Non-smoker	Surgical	Specialist	Jordanian Royal Medical Services	Full-Time	700-1400 JDs	40-48	1-3 on-calls	Yes	No	No	Often	Very Often	Very Often	Often	Sometimes	Very Often	Sometimes	Rarely	Rarely	Rarely	Strongly disagree	Disagree	Neutral/Undecided	Strongly disagree	Neutral/Undecided
30	Male	Single	1-3 Persons	Owned Falt/House	North (Irbid, Ajloun, Jerash, Mafraq)	Smoker	Medical	Resident	Jordanian Royal Medical Services	Part-Time	700-1400 JDs	>48	1-3 on-calls	No	No	No	Always	Very Often	Very Often	Always	Often	Always	Always	Sometimes	Always	Always	Neutral/undecided	Neutral/Undecided	Agree	Neutral/Undecided	Agree
30	Male	Married	>6 Persons	Owned Falt/House	North (Irbid, Ajloun, Jerash, Mafraq)	Smoker	Medical	Resident	Jordanian Royal Medical Services	Full-Time	700-1400 JDs	40-48	1-3 on-calls	No	No	No	Always	Very Often	Very Often	Very Often	Sometimes	Often	Sometimes	Almost Never	Very Often	Often	Disagree	Neutral/Undecided	Agree	Neutral/Undecided	Disagree
31	Male	Single	4-6 Persons	Owned Falt/House	Central (Amman, Zarqa, Madaba, Al-Balqaa)	Smoker	Surgical	Specialist	Jordanian Royal Medical Services	Full-Time	700-1400 JDs	<40	0	Yes	No	Yes	Sometimes	Sometimes	Sometimes	Sometimes	Sometimes	Sometimes	Rarely	Rarely	Often	Sometimes	Neutral/undecided	Neutral/Undecided	Agree	Disagree	Agree
31	Male	Single	1-3 Persons	Owned Falt/House	Central (Amman, Zarqa, Madaba, Al-Balqaa)	Smoker	Surgical	Specialist	Jordanian Royal Medical Services	Full-Time	700-1400 JDs	>48	1-3 on-calls	No	No	No	Very Often	Always	Always	Very Often	Sometimes	Always	Sometimes	Sometimes	Sometimes	Always	Strongly disagree	Neutral/Undecided	Neutral/Undecided	Strongly disagree	Strongly agree
33	Male	Married	4-6 Persons	Owned Falt/House	South (Aqapa, Karak, Maan, Tafileh)	Smoker	Surgical	Specialist	Jordanian Royal Medical Services	Full-Time	700-1400 JDs	>48	1-3 on-calls	Yes	No	No	Often	Sometimes	Often	Rarely	Sometimes	Sometimes	Often	Rarely	Rarely	Rarely	Agree	Neutral/Undecided	Neutral/Undecided	Agree	Disagree
35	Male	Single	1-3 Persons	Owned Falt/House	Central (Amman, Zarqa, Madaba, Al-Balqaa)	Smoker	Surgical	Specialist	Jordanian Royal Medical Services	Full-Time	700-1400 JDs	40-48	1-3 on-calls	Yes	No	No	Often	Often	Often	Sometimes	Rarely	Very Often	Sometimes	Rarely	Sometimes	Sometimes	Neutral/undecided	Neutral/Undecided	Agree	Neutral/Undecided	Neutral/Undecided
29	Male	Married	4-6 Persons	Owned Falt/House	North (Irbid, Ajloun, Jerash, Mafraq)	Smoker	Surgical	Resident	Jordanian Royal Medical Services	Full-Time	700-1400 JDs	>48	1-3 on-calls	Yes	No	No	Always	Always	Often	Always	Rarely	Often	Sometimes	Rarely	Almost Never	Very Often	Agree	Disagree	Agree	Neutral/Undecided	Disagree
36	Male	Married	1-3 Persons	Rented Falt/House	Central (Amman, Zarqa, Madaba, Al-Balqaa)	Smoker	Medical	Specialist	Jordanian Royal Medical Services	Full-Time	>1400 JDs	>48	>3	No	No	No	Very Often	Always	Always	Always	Always	Always	Often	Always	Always	Very Often	Strongly disagree	Disagree	Agree	Neutral/Undecided	Strongly disagree
34	Female	Married	4-6 Persons	Owned Falt/House	North (Irbid, Ajloun, Jerash, Mafraq)	Non-smoker	Surgical	Specialist	Jordanian Royal Medical Services	Full-Time	700-1400 JDs	>48	1-3 on-calls	No	No	No	Sometimes	Very Often	Very Often	Very Often	Never	Sometimes	Sometimes	Almost Never	Sometimes	Often	Agree	Neutral/Undecided	Agree	Disagree	Agree
32	Male	Married	4-6 Persons	Rented Falt/House	Central (Amman, Zarqa, Madaba, Al-Balqaa)	Non-smoker	Medical	Specialist	Jordanian Royal Medical Services	Full-Time	700-1400 JDs	>48	>3	Yes	No	No	Sometimes	Never	Never	Never	Never	Never	Sometimes	Rarely	Always	Never	Neutral/undecided	Neutral/Undecided	Neutral/Undecided	Neutral/Undecided	Neutral/Undecided
43	Male	Married	1-3 Persons	Owned Falt/House	Central (Amman, Zarqa, Madaba, Al-Balqaa)	Non-smoker	Surgical	Specialist	Jordanian Royal Medical Services	Full-Time	700-1400 JDs	>48	1-3 on-calls	No	No	No	Sometimes	Often	Often	Very Often	Very Often	Sometimes	Sometimes	Rarely	Rarely	Sometimes	Neutral/undecided	Neutral/Undecided	Agree	Neutral/Undecided	Disagree
40	Male	Married	4-6 Persons	Owned Falt/House	Central (Amman, Zarqa, Madaba, Al-Balqaa)	Non-smoker	Surgical	Specialist	Private Hospitals/Clinics	Part-Time	<700 JDs	<40	0	Yes	No	No	Never	Sometimes	Never	Never	Never	Never	Never	Never	Never	Never	Strongly Agree	Strongly Agree	Strongly disagree	Strongly agree	Strongly disagree
28	Female	Married	1-3 Persons	Owned Falt/House	Central (Amman, Zarqa, Madaba, Al-Balqaa)	Non-smoker	Surgical	Resident	Jordanian Royal Medical Services	Full-Time	<700 JDs	>48	1-3 on-calls	Yes	No	No	Always	Always	Always	Always	Never	Always	Always	Never	Always	Always	Strongly disagree	Disagree	Agree	Neutral/Undecided	Strongly disagree
39	Male	Married	4-6 Persons	Owned Falt/House	North (Irbid, Ajloun, Jerash, Mafraq)	Smoker	Medical	Specialist	Jordanian Royal Medical Services	Full-Time	700-1400 JDs	40-48	0	No	No	No	Sometimes	Always	Very Often	Very Often	Rarely	Very Often	Often	Sometimes	Sometimes	Often	Disagree	Neutral/Undecided	Agree	Disagree	Strongly agree
43	Male	Married	4-6 Persons	Owned Falt/House	North (Irbid, Ajloun, Jerash, Mafraq)	Non-smoker	Medical	Specialist	Private Hospitals/Clinics	Full-Time	700-1400 JDs	<40	1-3 on-calls	Yes	No	No	Sometimes	Very Often	Rarely	Rarely	Never	Never	Rarely	Sometimes	Rarely	Never	Agree	Neutral/Undecided	Disagree	Neutral/Undecided	Agree
29	Male	Single	1-3 Persons	Owned Falt/House	Central (Amman, Zarqa, Madaba, Al-Balqaa)	Smoker	Surgical	Resident	Jordanian Royal Medical Services	Full-Time	700-1400 JDs	40-48	1-3 on-calls	Yes	No	No	Often	Often	Very Often	Often	Often	Often	Often	Often	Often	Often	Neutral/undecided	Neutral/Undecided	Neutral/Undecided	Agree	Neutral/Undecided
36	Male	Married	1-3 Persons	Owned Falt/House	Central (Amman, Zarqa, Madaba, Al-Balqaa)	Non-smoker	Surgical	Specialist	Jordanian Royal Medical Services	Full-Time	700-1400 JDs	40-48	1-3 on-calls	Yes	No	No	Sometimes	Sometimes	Rarely	Rarely	Almost Never	Rarely	Sometimes	Almost Never	Sometimes	Never	Agree	Agree	Disagree	Agree	Disagree
27	Male	Married	1-3 Persons	Rented Falt/House	North (Irbid, Ajloun, Jerash, Mafraq)	Non-smoker	Medical	Resident	Jordanian Royal Medical Services	Full-Time	700-1400 JDs	>48	>3	No	No	No	Often	Often	Sometimes	Rarely	Rarely	Rarely	Sometimes	Almost Never	Very Often	Rarely	Agree	Agree	Disagree	Agree	Disagree
31	Male	Married	1-3 Persons	Rented Falt/House	Central (Amman, Zarqa, Madaba, Al-Balqaa)	Smoker	Surgical	Resident	Jordanian Royal Medical Services	Full-Time	700-1400 JDs	40-48	1-3 on-calls	Yes	No	Yes	Sometimes	Very Often	Sometimes	Rarely	Rarely	Rarely	Almost Never	Never	Rarely	Almost Never	Neutral/undecided	Agree	Strongly disagree	Strongly agree	Strongly disagree
27	Female	Single	4-6 Persons	Owned Falt/House	Central (Amman, Zarqa, Madaba, Al-Balqaa)	Non-smoker	Medical	Resident	Jordanian Royal Medical Services	Full-Time	700-1400 JDs	>48	1-3 on-calls	No	No	Yes	Always	Always	Always	Always	Often	Always	Sometimes	Very Often	Sometimes	Very Often	Disagree	Neutral/Undecided	Disagree	Neutral/Undecided	Neutral/Undecided
31	Male	Married	1-3 Persons	Rented Falt/House	Central (Amman, Zarqa, Madaba, Al-Balqaa)	Smoker	Medical	Specialist	Jordanian Royal Medical Services	Full-Time	700-1400 JDs	>48	>3	Yes	No	No	Sometimes	Sometimes	Often	Often	Often	Very Often	Never	Never	Often	Almost Never	Strongly disagree	Neutral/Undecided	Neutral/Undecided	Disagree	Agree
27	Female	Single	4-6 Persons	Owned Falt/House	North (Irbid, Ajloun, Jerash, Mafraq)	Non-smoker	Medical	Resident	Jordanian Royal Medical Services	Full-Time	700-1400 JDs	>48	1-3 on-calls	No	No	No	Very Often	Always	Often	Very Often	Always	Often	Often	Sometimes	Sometimes	Sometimes	Disagree	Strongly disagree	Agree	Disagree	Neutral/Undecided
30	Male	Married	1-3 Persons	Owned Falt/House	North (Irbid, Ajloun, Jerash, Mafraq)	Smoker	Medical	Resident	Jordanian Royal Medical Services	Full-Time	700-1400 JDs	40-48	>3	Yes	Yes	No	Often	Never	Never	Rarely	Never	Rarely	Sometimes	Never	Sometimes	Very Often	Strongly Agree	Agree	Disagree	Agree	Disagree
27	Male	Single	4-6 Persons	Rented Falt/House	Central (Amman, Zarqa, Madaba, Al-Balqaa)	Smoker	Surgical	Resident	Jordanian Royal Medical Services	Full-Time	700-1400 JDs	>48	1-3 on-calls	Yes	Yes	No	Always	Often	Sometimes	Sometimes	Sometimes	Rarely	Often	Rarely	Very Often	Sometimes	Neutral/undecided	Agree	Strongly Agree	Agree	Disagree
34	Male	Married	4-6 Persons	Owned Falt/House	Central (Amman, Zarqa, Madaba, Al-Balqaa)	Smoker	Surgical	Specialist	Jordanian Royal Medical Services	Full-Time	700-1400 JDs	>48	0	Yes	No	No	Sometimes	Often	Sometimes	Sometimes	Sometimes	Sometimes	Sometimes	Sometimes	Sometimes	Sometimes	Agree	Agree	Agree	Strongly disagree	Agree
30	Male	Single	4-6 Persons	Owned Falt/House	Central (Amman, Zarqa, Madaba, Al-Balqaa)	Smoker	Surgical	Resident	Jordanian Royal Medical Services	Full-Time	700-1400 JDs	40-48	1-3 on-calls	No	No	No	Always	Often	Often	Very Often	Never	Often	Often	Sometimes	Always	Sometimes	Agree	Neutral/Undecided	Strongly disagree	Disagree	Strongly disagree
40	Male	Married	4-6 Persons	Owned Falt/House	Central (Amman, Zarqa, Madaba, Al-Balqaa)	Smoker	Surgical	Specialist	Jordanian Royal Medical Services	Full-Time	700-1400 JDs	>48	1-3 on-calls	No	No	No	Very Often	Often	Often	Often	Sometimes	Often	Sometimes	Rarely	Almost Never	Sometimes	Neutral/undecided	Neutral/Undecided	Neutral/Undecided	Agree	Disagree
27	Male	Single	>6 Persons	Owned Falt/House	Central (Amman, Zarqa, Madaba, Al-Balqaa)	Smoker	Medical	Resident	Jordanian Royal Medical Services	Full-Time	700-1400 JDs	40-48	1-3 on-calls	No	No	Yes	Very Often	Very Often	Often	Often	Sometimes	Often	Sometimes	Sometimes	Often	Often	Neutral/undecided	Neutral/Undecided	Neutral/Undecided	Neutral/Undecided	Neutral/Undecided
28	Male	Single	>6 Persons	Owned Falt/House	North (Irbid, Ajloun, Jerash, Mafraq)	Smoker	Medical	General Practitioner	Jordanian Royal Medical Services	Full-Time	700-1400 JDs	40-48	1-3 on-calls	Yes	No	No	Sometimes	Rarely	Sometimes	Rarely	Rarely	Rarely	Sometimes	Rarely	Sometimes	Rarely	Disagree	Disagree	Neutral/Undecided	Neutral/Undecided	Neutral/Undecided
34	Female	Married	4-6 Persons	Owned Falt/House	North (Irbid, Ajloun, Jerash, Mafraq)	Non-smoker	Surgical	Specialist	Jordanian Royal Medical Services	Full-Time	700-1400 JDs	>48	1-3 on-calls	No	No	No	Sometimes	Very Often	Very Often	Very Often	Never	Sometimes	Sometimes	Almost Never	Sometimes	Often	Agree	Neutral/Undecided	Agree	Disagree	Agree
28	Female	Married	1-3 Persons	Owned Falt/House	Central (Amman, Zarqa, Madaba, Al-Balqaa)	Non-smoker	Surgical	Resident	Jordanian Royal Medical Services	Full-Time	<700 JDs	>48	1-3 on-calls	Yes	No	No	Always	Always	Always	Always	Never	Always	Always	Never	Always	Always	Strongly disagree	Disagree	Agree	Neutral/Undecided	Strongly disagree
40	Male	Married	4-6 Persons	Owned Falt/House	Central (Amman, Zarqa, Madaba, Al-Balqaa)	Smoker	Surgical	Specialist	Jordanian Royal Medical Services	Full-Time	700-1400 JDs	>48	1-3 on-calls	No	No	No	Very Often	Often	Often	Often	Sometimes	Often	Sometimes	Rarely	Almost Never	Sometimes	Neutral/undecided	Neutral/Undecided	Neutral/Undecided	Agree	Disagree
27	Male	Single	4-6 Persons	Owned Falt/House	North (Irbid, Ajloun, Jerash, Mafraq)	Non-smoker	Medical	Resident	Jordanian Royal Medical Services	Full-Time	<700 JDs	>48	1-3 on-calls	Yes	No	No	Very Often	Always	Very Often	Very Often	Rarely	Always	Often	Almost Never	Almost Never	Very Often	Strongly Agree	Strongly Agree	Strongly Agree	Disagree	Agree
40	Male	Married	1-3 Persons	Rented Falt/House	Central (Amman, Zarqa, Madaba, Al-Balqaa)	Non-smoker	Surgical	Specialist	Jordanian Royal Medical Services	Full-Time	700-1400 JDs	<40	1-3 on-calls	Yes	No	No	Sometimes	Often	Often	Often	Often	Often	Sometimes	Sometimes	Rarely	Sometimes	Disagree	Disagree	Disagree	Disagree	Neutral/Undecided
45	Male	Married	4-6 Persons	Owned Falt/House	Central (Amman, Zarqa, Madaba, Al-Balqaa)	Non-smoker	Surgical	Consultant	Jordanian Royal Medical Services	Full-Time	700-1400 JDs	>48	>3	Yes	No	No	Often	Often	Sometimes	Sometimes	Sometimes	Sometimes	Rarely	Almost Never	Rarely	Rarely	Strongly Agree	Strongly Agree	Neutral/Undecided	Strongly agree	Strongly disagree
32	Male	Married	1-3 Persons	Owned Falt/House	Central (Amman, Zarqa, Madaba, Al-Balqaa)	Smoker	Medical	Resident	Jordanian Royal Medical Services	Full-Time	700-1400 JDs	>48	1-3 on-calls	No	No	No	Sometimes	Sometimes	Rarely	Sometimes	Almost Never	Rarely	Rarely	Rarely	Never	Almost Never	Neutral/undecided	Neutral/Undecided	Neutral/Undecided	Agree	Disagree
43	Male	Married	1-3 Persons	Owned Falt/House	Central (Amman, Zarqa, Madaba, Al-Balqaa)	Smoker	Surgical	Consultant	Jordanian Royal Medical Services	Full-Time	700-1400 JDs	<40	0	Yes	No	No	Very Often	Very Often	Often	Often	Often	Often	Very Often	Often	Very Often	Very Often	Neutral/undecided	Neutral/Undecided	Agree	Neutral/Undecided	Neutral/Undecided
57	Male	Married	1-3 Persons	Owned Falt/House	North (Irbid, Ajloun, Jerash, Mafraq)	Non-smoker	Medical	Consultant	Private Hospitals/Clinics	Full-Time	700-1400 JDs	>48	>3	Yes	No	Yes	Often	Sometimes	Often	Often	Often	Often	Often	Often	Often	Often	Agree	Agree	Agree	Agree	Agree
43	Male	Married	1-3 Persons	Owned Falt/House	Central (Amman, Zarqa, Madaba, Al-Balqaa)	Non-smoker	Medical	Consultant	Private Hospitals/Clinics	Full-Time	>1400 JDs	>48	0	Yes	No	No	Very Often	Very Often	Often	Very Often	Often	Sometimes	Sometimes	Sometimes	Very Often	Very Often	Agree	Agree	Neutral/Undecided	Agree	Strongly agree
40	Male	Married	4-6 Persons	Owned Falt/House	Central (Amman, Zarqa, Madaba, Al-Balqaa)	Smoker	Medical	Consultant	Private Hospitals/Clinics	Full-Time	>1400 JDs	>48	0	Yes	Yes	No	Rarely	Sometimes	Never	Almost Never	Never	Never	Rarely	Never	Rarely	Almost Never	Strongly Agree	Strongly Agree	Strongly disagree	Strongly agree	Strongly disagree
33	Male	Married	1-3 Persons	Rented Falt/House	North (Irbid, Ajloun, Jerash, Mafraq)	Non-smoker	Medical	Specialist	Jordanian Royal Medical Services	Full-Time	700-1400 JDs	40-48	>3	No	No	No	Often	Sometimes	Often	Sometimes	Rarely	Often	Rarely	Sometimes	Often	Sometimes	Neutral/undecided	Neutral/Undecided	Agree	Disagree	Neutral/Undecided
40	Male	Married	>6 Persons	Owned Falt/House	Central (Amman, Zarqa, Madaba, Al-Balqaa)	Smoker	Surgical	Consultant	Jordanian Royal Medical Services	Full-Time	700-1400 JDs	>48	1-3 on-calls	Yes	No	No	Often	Sometimes	Rarely	Often	Sometimes	Sometimes	Rarely	Rarely	Rarely	Rarely	Neutral/undecided	Disagree	Neutral/Undecided	Agree	Disagree
31	Male	Single	4-6 Persons	Rented Falt/House	Central (Amman, Zarqa, Madaba, Al-Balqaa)	Smoker	Surgical	Resident	Jordanian Ministry of Health	Full-Time	<700 JDs	>48	>3	No	No	No	Always	Always	Always	Always	Always	Always	Always	Never	Always	Sometimes	Agree	Disagree	Agree	Agree	Strongly disagree
50	Male	Married	>6 Persons	Owned Falt/House	Central (Amman, Zarqa, Madaba, Al-Balqaa)	Non-smoker	Surgical	Consultant	Jordanian Royal Medical Services	Full-Time	>1400 JDs	40-48	1-3 on-calls	No	No	No	Sometimes	Sometimes	Almost Never	Sometimes	Sometimes	Rarely	Almost Never	Almost Never	Often	Sometimes	Agree	Neutral/Undecided	Disagree	Neutral/Undecided	Disagree
41	Male	Married	1-3 Persons	Owned Falt/House	Central (Amman, Zarqa, Madaba, Al-Balqaa)	Non-smoker	Medical	Consultant	Jordanian Royal Medical Services	Full-Time	700-1400 JDs	40-48	1-3 on-calls	Yes	No	No	Always	Very Often	Sometimes	Very Often	Almost Never	Sometimes	Often	Sometimes	Rarely	Often	Neutral/undecided	Neutral/Undecided	Agree	Disagree	Neutral/Undecided
39	Male	Married	>6 Persons	Owned Falt/House	Central (Amman, Zarqa, Madaba, Al-Balqaa)	Non-smoker	Medical	Consultant	Private Hospitals/Clinics	Full-Time	>1400 JDs	<40	0	Yes	No	No	Sometimes	Sometimes	Sometimes	Sometimes	Sometimes	Rarely	Never	Never	Never	Sometimes	Strongly Agree	Strongly Agree	Neutral/Undecided	Strongly agree	Strongly disagree
32	Male	Single	4-6 Persons	Owned Falt/House	Central (Amman, Zarqa, Madaba, Al-Balqaa)	Smoker	Surgical	Resident	Jordanian Royal Medical Services	Full-Time	700-1400 JDs	>48	1-3 on-calls	Yes	No	No	Always	Very Often	Sometimes	Often	Rarely	Sometimes	Sometimes	Never	Often	Sometimes	Neutral/undecided	Agree	Disagree	Agree	Disagree
44	Male	Married	>6 Persons	Owned Falt/House	Central (Amman, Zarqa, Madaba, Al-Balqaa)	Smoker	Surgical	Consultant	Jordanian Royal Medical Services	Full-Time	700-1400 JDs	>48	>3	Yes	No	No	Often	Rarely	Sometimes	Sometimes	Sometimes	Sometimes	Sometimes	Sometimes	Sometimes	Sometimes	Strongly disagree	Strongly Agree	Neutral/Undecided	Strongly agree	Strongly disagree
31	Male	Single	1-3 Persons	Owned Falt/House	Central (Amman, Zarqa, Madaba, Al-Balqaa)	Smoker	Surgical	Specialist	Jordanian Royal Medical Services	Full-Time	700-1400 JDs	>48	1-3 on-calls	No	No	No	Very Often	Always	Always	Very Often	Sometimes	Always	Sometimes	Sometimes	Sometimes	Always	Strongly disagree	Neutral/Undecided	Neutral/Undecided	Strongly disagree	Strongly agree
43	Male	Married	>6 Persons	Rented Falt/House	Central (Amman, Zarqa, Madaba, Al-Balqaa)	Smoker	Surgical	Specialist	Jordanian Royal Medical Services	Full-Time	700-1400 JDs	>48	1-3 on-calls	No	No	No	Very Often	Always	Very Often	Very Often	Very Often	Very Often	Often	Sometimes	Often	Very Often	Disagree	Neutral/Undecided	Agree	Strongly disagree	Agree
40	Male	Single	1-3 Persons	Rented Falt/House	Central (Amman, Zarqa, Madaba, Al-Balqaa)	Smoker	Surgical	Specialist	Jordanian Royal Medical Services	Full-Time	<700 JDs	40-48	1-3 on-calls	Yes	No	No	Often	Very Often	Rarely	Sometimes	Rarely	Sometimes	Sometimes	Rarely	Sometimes	Often	Neutral/undecided	Neutral/Undecided	Neutral/Undecided	Neutral/Undecided	Neutral/Undecided
45	Male	Married	1-3 Persons	Owned Falt/House	Central (Amman, Zarqa, Madaba, Al-Balqaa)	Non-smoker	Surgical	Consultant	Jordanian Royal Medical Services	Full-Time	700-1400 JDs	40-48	0	Yes	No	No	Sometimes	Often	Never	Rarely	Rarely	Rarely	Rarely	Never	Sometimes	Rarely	Agree	Agree	Disagree	Agree	Disagree
47	Male	Married	4-6 Persons	Owned Falt/House	Central (Amman, Zarqa, Madaba, Al-Balqaa)	Non-smoker	Medical	Consultant	Jordanian Royal Medical Services	Full-Time	>1400 JDs	40-48	>3	Yes	No	Yes	Very Often	Sometimes	Very Often	Very Often	Often	Very Often	Often	Sometimes	Sometimes	Very Often	Disagree	Disagree	Disagree	Strongly disagree	Agree
28	Male	Single	4-6 Persons	Owned Falt/House	Central (Amman, Zarqa, Madaba, Al-Balqaa)	Non-smoker	Medical	Resident	Jordanian Royal Medical Services	Full-Time	<700 JDs	>48	1-3 on-calls	No	No	No	Often	Sometimes	Often	Sometimes	Sometimes	Always	Rarely	Sometimes	Sometimes	Sometimes	Agree	Neutral/Undecided	Agree	Neutral/Undecided	Neutral/Undecided
46	Male	Married	1-3 Persons	Rented Falt/House	Central (Amman, Zarqa, Madaba, Al-Balqaa)	Non-smoker	Surgical	Consultant	Jordanian Royal Medical Services	Full-Time	>1400 JDs	>48	1-3 on-calls	No	No	No	Sometimes	Sometimes	Almost Never	Rarely	Rarely	Sometimes	Rarely	Never	Rarely	Almost Never	Neutral/undecided	Agree	Disagree	Agree	Disagree
44	Male	Married	1-3 Persons	Owned Falt/House	Central (Amman, Zarqa, Madaba, Al-Balqaa)	Non-smoker	Medical	Consultant	Private Hospitals/Clinics	Full-Time	>1400 JDs	>48	>3	Yes	No	Yes	Often	Sometimes	Rarely	Rarely	Never	Almost Never	Sometimes	Almost Never	Sometimes	Almost Never	Neutral/undecided	Neutral/Undecided	Disagree	Agree	Disagree
44	Male	Married	1-3 Persons	Owned Falt/House	Central (Amman, Zarqa, Madaba, Al-Balqaa)	Non-smoker	Medical	Consultant	Private Hospitals/Clinics	Full-Time	>1400 JDs	>48	>3	Yes	No	Yes	Often	Sometimes	Rarely	Rarely	Never	Almost Never	Sometimes	Almost Never	Sometimes	Almost Never	Neutral/undecided	Neutral/Undecided	Disagree	Agree	Disagree
40	Male	Single	4-6 Persons	Owned Falt/House	Central (Amman, Zarqa, Madaba, Al-Balqaa)	Smoker	Surgical	Specialist	Jordanian Royal Medical Services	Full-Time	>1400 JDs	40-48	0	No	No	No	Often	Very Often	Very Often	Very Often	Sometimes	Very Often	Rarely	Almost Never	Very Often	Sometimes	Neutral/undecided	Strongly disagree	Neutral/Undecided	Strongly disagree	Neutral/Undecided
43	Male	Married	4-6 Persons	Owned Falt/House	Central (Amman, Zarqa, Madaba, Al-Balqaa)	Smoker	Medical	Specialist	Jordanian Royal Medical Services	Full-Time	>1400 JDs	>48	>3	Yes	Yes	No	Sometimes	Very Often	Sometimes	Sometimes	Never	Sometimes	Sometimes	Rarely	Often	Sometimes	Disagree	Neutral/Undecided	Disagree	Disagree	Disagree
33	Male	Married	1-3 Persons	Owned Falt/House	Central (Amman, Zarqa, Madaba, Al-Balqaa)	Smoker	Medical	Specialist	Jordanian Royal Medical Services	Full-Time	700-1400 JDs	>48	>3	Yes	No	Yes	Often	Sometimes	Sometimes	Very Often	Rarely	Almost Never	Sometimes	Rarely	Often	Sometimes	Disagree	Neutral/Undecided	Neutral/Undecided	Agree	Disagree
41	Male	Single	1-3 Persons	Owned Falt/House	Central (Amman, Zarqa, Madaba, Al-Balqaa)	Smoker	Medical	Specialist	Private Hospitals/Clinics	Full-Time	>1400 JDs	>48	1-3 on-calls	No	No	No	Very Often	Always	Always	Very Often	Always	Always	Very Often	Very Often	Always	Very Often	Strongly disagree	Strongly disagree	Strongly Agree	Strongly disagree	Strongly agree
36	Male	Married	1-3 Persons	Rented Falt/House	Central (Amman, Zarqa, Madaba, Al-Balqaa)	Smoker	Surgical	Specialist	Jordanian Royal Medical Services	Full-Time	700-1400 JDs	>48	1-3 on-calls	Yes	No	No	Often	Very Often	Almost Never	Very Often	Sometimes	Sometimes	Rarely	Almost Never	Often	Sometimes	Disagree	Neutral/Undecided	Neutral/Undecided	Neutral/Undecided	Agree
44	Male	Married	4-6 Persons	Owned Falt/House	Central (Amman, Zarqa, Madaba, Al-Balqaa)	Non-smoker	Medical	Specialist	Jordanian Royal Medical Services	Full-Time	700-1400 JDs	40-48	1-3 on-calls	Yes	No	No	Rarely	Sometimes	Sometimes	Sometimes	Sometimes	Often	Rarely	Sometimes	Rarely	Sometimes	Neutral/undecided	Neutral/Undecided	Agree	Neutral/Undecided	Neutral/Undecided
35	Male	Married	4-6 Persons	Owned Falt/House	Central (Amman, Zarqa, Madaba, Al-Balqaa)	Smoker	Medical	Specialist	Jordanian Royal Medical Services	Full-Time	700-1400 JDs	>48	>3	No	No	No	Very Often	Very Often	Sometimes	Sometimes	Sometimes	Sometimes	Sometimes	Sometimes	Sometimes	Sometimes	Strongly disagree	Neutral/Undecided	Agree	Strongly disagree	Agree
27	Male	Single	4-6 Persons	Owned Falt/House	North (Irbid, Ajloun, Jerash, Mafraq)	Non-smoker	Surgical	Resident	Jordanian Royal Medical Services	Full-Time	700-1400 JDs	40-48	1-3 on-calls	No	No	No	Often	Sometimes	Sometimes	Rarely	Rarely	Rarely	Sometimes	Rarely	Never	Almost Never	Agree	Agree	Neutral/Undecided	Neutral/Undecided	Disagree
33	Male	Married	4-6 Persons	Rented Falt/House	Central (Amman, Zarqa, Madaba, Al-Balqaa)	Smoker	Surgical	Specialist	Jordanian Royal Medical Services	Full-Time	700-1400 JDs	>48	>3	No	No	No	Very Often	Very Often	Sometimes	Very Often	Often	Very Often	Often	Sometimes	Often	Sometimes	Neutral/undecided	Neutral/Undecided	Agree	Agree	Disagree
36	Male	Married	4-6 Persons	Rented Falt/House	Central (Amman, Zarqa, Madaba, Al-Balqaa)	Non-smoker	Surgical	Specialist	Jordanian Royal Medical Services	Full-Time	700-1400 JDs	>48	>3	No	No	Yes	Always	Sometimes	Often	Sometimes	Sometimes	Often	Often	Rarely	Sometimes	Sometimes	Neutral/undecided	Disagree	Agree	Disagree	Neutral/Undecided
34	Female	Married	4-6 Persons	Owned Falt/House	Central (Amman, Zarqa, Madaba, Al-Balqaa)	Non-smoker	Medical	Specialist	Jordanian Royal Medical Services	Full-Time	700-1400 JDs	<40	0	No	No	No	Very Often	Sometimes	Sometimes	Sometimes	Often	Often	Sometimes	Sometimes	Rarely	Sometimes	Neutral/undecided	Neutral/Undecided	Agree	Neutral/Undecided	Neutral/Undecided
31	Male	Married	1-3 Persons	Owned Falt/House	North (Irbid, Ajloun, Jerash, Mafraq)	Smoker	Medical	Specialist	Jordanian Royal Medical Services	Full-Time	700-1400 JDs	40-48	1-3 on-calls	No	No	No	Often	Always	Very Often	Very Often	Often	Often	Often	Sometimes	Sometimes	Sometimes	Neutral/undecided	Neutral/Undecided	Neutral/Undecided	Disagree	Agree
40	Male	Married	4-6 Persons	Rented Falt/House	South (Aqapa, Karak, Maan, Tafileh)	Smoker	Surgical	Specialist	Jordanian Royal Medical Services	Full-Time	700-1400 JDs	40-48	1-3 on-calls	No	No	No	Often	Often	Often	Often	Often	Often	Sometimes	Sometimes	Sometimes	Sometimes	Agree	Neutral/Undecided	Agree	Disagree	Neutral/Undecided
27	Male	Single	4-6 Persons	Owned Falt/House	South (Aqapa, Karak, Maan, Tafileh)	Smoker	Surgical	Resident	Jordanian Royal Medical Services	Full-Time	<700 JDs	>48	>3	Yes	No	No	Always	Always	Always	Always	Rarely	Always	Sometimes	Sometimes	Always	Always	Strongly Agree	Strongly Agree	Strongly Agree	Disagree	Strongly agree
36	Male	Married	4-6 Persons	Rented Falt/House	Central (Amman, Zarqa, Madaba, Al-Balqaa)	Smoker	Surgical	Specialist	Jordanian Royal Medical Services	Full-Time	>1400 JDs	40-48	1-3 on-calls	No	No	No	Sometimes	Sometimes	Rarely	Rarely	Rarely	Rarely	Rarely	Rarely	Rarely	Rarely	Agree	Neutral/Undecided	Disagree	Neutral/Undecided	Disagree
43	Male	Married	4-6 Persons	Owned Falt/House	Central (Amman, Zarqa, Madaba, Al-Balqaa)	Non-smoker	Surgical	Specialist	Jordanian Royal Medical Services	Full-Time	700-1400 JDs	40-48	1-3 on-calls	Yes	No	No	Sometimes	Sometimes	Sometimes	Rarely	Rarely	Rarely	Rarely	Almost Never	Sometimes	Rarely	Agree	Agree	Disagree	Neutral/Undecided	Disagree
32	Male	Married	>6 Persons	Owned Falt/House	Central (Amman, Zarqa, Madaba, Al-Balqaa)	Smoker	Surgical	Resident	Jordanian Royal Medical Services	Full-Time	700-1400 JDs	>48	>3	Yes	No	No	Often	Sometimes	Never	Sometimes	Never	Rarely	Almost Never	Rarely	Almost Never	Rarely	Strongly Agree	Strongly Agree	Neutral/Undecided	Strongly agree	Strongly disagree
45	Male	Married	1-3 Persons	Rented Falt/House	Central (Amman, Zarqa, Madaba, Al-Balqaa)	Non-smoker	Surgical	Consultant	Jordanian Royal Medical Services	Full-Time	700-1400 JDs	40-48	1-3 on-calls	Yes	No	No	Often	Very Often	Sometimes	Sometimes	Rarely	Often	Rarely	Sometimes	Rarely	Rarely	Agree	Neutral/Undecided	Disagree	Neutral/Undecided	Disagree
45	Male	Married	4-6 Persons	Owned Falt/House	Central (Amman, Zarqa, Madaba, Al-Balqaa)	Non-smoker	Medical	Consultant	Jordanian Royal Medical Services	Full-Time	700-1400 JDs	40-48	1-3 on-calls	Yes	Yes	No	Sometimes	Sometimes	Rarely	Rarely	Never	Sometimes	Sometimes	Never	Rarely	Sometimes	Strongly Agree	Strongly Agree	Neutral/Undecided	Agree	Agree
45	Male	Married	1-3 Persons	Owned Falt/House	Central (Amman, Zarqa, Madaba, Al-Balqaa)	Non-smoker	Surgical	Consultant	Jordanian Royal Medical Services	Full-Time	700-1400 JDs	40-48	0	Yes	No	No	Sometimes	Often	Never	Rarely	Rarely	Rarely	Rarely	Never	Sometimes	Rarely	Agree	Agree	Disagree	Agree	Disagree
43	Male	Married	>6 Persons	Owned Falt/House	Central (Amman, Zarqa, Madaba, Al-Balqaa)	Smoker	Medical	Specialist	Jordanian Royal Medical Services	Full-Time	700-1400 JDs	>48	1-3 on-calls	Yes	No	No	Very Often	Always	Sometimes	Always	Very Often	Always	Very Often	Always	Very Often	Always	Disagree	Strongly Agree	Agree	Neutral/Undecided	Agree
29	Male	Single	4-6 Persons	Owned Falt/House	North (Irbid, Ajloun, Jerash, Mafraq)	Non-smoker	Medical	Resident	Jordanian Royal Medical Services	Full-Time	700-1400 JDs	40-48	1-3 on-calls	No	No	Yes	Sometimes	Sometimes	Sometimes	Often	Sometimes	Very Often	Very Often	Sometimes	Sometimes	Sometimes	Agree	Neutral/Undecided	Neutral/Undecided	Neutral/Undecided	Neutral/Undecided
30	Male	Married	1-3 Persons	Rented Falt/House	Central (Amman, Zarqa, Madaba, Al-Balqaa)	Smoker	Surgical	Resident	Jordanian Royal Medical Services	Full-Time	700-1400 JDs	>48	1-3 on-calls	No	No	Yes	Always	Always	Always	Always	Never	Always	Very Often	Almost Never	Almost Never	Sometimes	Strongly disagree	Agree	Disagree	Neutral/Undecided	Agree
47	Male	Married	4-6 Persons	Owned Falt/House	Central (Amman, Zarqa, Madaba, Al-Balqaa)	Smoker	Surgical	Consultant	Jordanian Royal Medical Services	Full-Time	>1400 JDs	>48	1-3 on-calls	Yes	No	No	Very Often	Sometimes	Sometimes	Rarely	Almost Never	Sometimes	Sometimes	Almost Never	Often	Almost Never	Agree	Agree	Disagree	Agree	Disagree
57	Male	Married	4-6 Persons	Owned Falt/House	Central (Amman, Zarqa, Madaba, Al-Balqaa)	Smoker	Surgical	Consultant	Jordanian Royal Medical Services	Full-Time	>1400 JDs	40-48	1-3 on-calls	No	No	No	Often	Very Often	Very Often	Very Often	Very Often	Very Often	Very Often	Never	Never	Rarely	Agree	Disagree	Disagree	Disagree	Agree
31	Male	Married	1-3 Persons	Owned Falt/House	Central (Amman, Zarqa, Madaba, Al-Balqaa)	Smoker	Surgical	Resident	Jordanian Royal Medical Services	Full-Time	700-1400 JDs	>48	1-3 on-calls	No	No	No	Always	Very Often	Very Often	Very Often	Sometimes	Very Often	Very Often	Very Often	Very Often	Very Often	Neutral/undecided	Neutral/Undecided	Agree	Neutral/Undecided	Neutral/Undecided
51	Male	Married	4-6 Persons	Owned Falt/House	North (Irbid, Ajloun, Jerash, Mafraq)	Non-smoker	Surgical	Consultant	Jordanian Royal Medical Services	Full-Time	>1400 JDs	<40	0	Yes	No	No	Sometimes	Sometimes	Rarely	Rarely	Sometimes	Rarely	Rarely	Sometimes	Rarely	Rarely	Strongly Agree	Agree	Strongly disagree	Strongly agree	Strongly disagree
49	Male	Married	4-6 Persons	Owned Falt/House	Central (Amman, Zarqa, Madaba, Al-Balqaa)	Non-smoker	Medical	Consultant	Private Hospitals/Clinics	Full-Time	700-1400 JDs	<40	0	Yes	No	No	Sometimes	Rarely	Rarely	Sometimes	Rarely	Sometimes	Sometimes	Never	Rarely	Rarely	Agree	Agree	Disagree	Agree	Disagree
37	Male	Married	1-3 Persons	Rented Falt/House	Central (Amman, Zarqa, Madaba, Al-Balqaa)	Smoker	Surgical	Specialist	Jordanian Royal Medical Services	Full-Time	700-1400 JDs	40-48	1-3 on-calls	Yes	No	No	Very Often	Often	Sometimes	Sometimes	Never	Sometimes	Rarely	Never	Sometimes	Rarely	Agree	Neutral/Undecided	Disagree	Strongly agree	Disagree
47	Male	Married	4-6 Persons	Owned Falt/House	Central (Amman, Zarqa, Madaba, Al-Balqaa)	Non-smoker	Medical	Consultant	Jordanian Royal Medical Services	Full-Time	>1400 JDs	40-48	>3	Yes	No	Yes	Very Often	Sometimes	Very Often	Very Often	Often	Very Often	Often	Sometimes	Sometimes	Very Often	Disagree	Disagree	Disagree	Strongly disagree	Agree
31	Male	Married	1-3 Persons	Owned Falt/House	Central (Amman, Zarqa, Madaba, Al-Balqaa)	Smoker	Surgical	Resident	Jordanian Royal Medical Services	Full-Time	700-1400 JDs	>48	1-3 on-calls	No	No	No	Always	Very Often	Very Often	Very Often	Sometimes	Very Often	Very Often	Very Often	Very Often	Very Often	Neutral/undecided	Neutral/Undecided	Agree	Neutral/Undecided	Neutral/Undecided
30	Male	Single	4-6 Persons	Owned Falt/House	Central (Amman, Zarqa, Madaba, Al-Balqaa)	Smoker	Surgical	Resident	Jordanian Royal Medical Services	Full-Time	700-1400 JDs	40-48	1-3 on-calls	No	No	No	Always	Often	Often	Very Often	Never	Often	Often	Sometimes	Always	Sometimes	Agree	Neutral/Undecided	Strongly disagree	Disagree	Strongly disagree
44	Male	Married	4-6 Persons	Owned Falt/House	Central (Amman, Zarqa, Madaba, Al-Balqaa)	Smoker	Medical	Consultant	Jordanian Royal Medical Services	Full-Time	>1400 JDs	>48	1-3 on-calls	Yes	No	No	Very Often	Very Often	Sometimes	Sometimes	Sometimes	Rarely	Often	Rarely	Rarely	Rarely	Neutral/undecided	Neutral/Undecided	Neutral/Undecided	Neutral/Undecided	Neutral/Undecided
34	Male	Single	1-3 Persons	Owned Falt/House	Central (Amman, Zarqa, Madaba, Al-Balqaa)	Non-smoker	Medical	Specialist	Private Hospitals/Clinics	Full-Time	700-1400 JDs	40-48	1-3 on-calls	Yes	No	No	Sometimes	Sometimes	Often	Sometimes	Often	Sometimes	Rarely	Sometimes	Rarely	Often	Neutral/undecided	Neutral/Undecided	Neutral/Undecided	Neutral/Undecided	Neutral/Undecided
36	Male	Single	1-3 Persons	Owned Falt/House	Central (Amman, Zarqa, Madaba, Al-Balqaa)	Smoker	Surgical	Specialist	Jordanian Ministry of Health	Full-Time	700-1400 JDs	40-48	1-3 on-calls	Yes	No	No	Often	Often	Sometimes	Always	Very Often	Always	Very Often	Very Often	Always	Very Often	Strongly disagree	Agree	Neutral/Undecided	Strongly disagree	Strongly agree
32	Male	Married	1-3 Persons	Rented Falt/House	Central (Amman, Zarqa, Madaba, Al-Balqaa)	Smoker	Medical	Resident	Jordanian Ministry of Health	Full-Time	<700 JDs	40-48	1-3 on-calls	Yes	No	No	Very Often	Very Often	Very Often	Very Often	Very Often	Very Often	Very Often	Very Often	Very Often	Very Often	Neutral/undecided	Agree	Strongly Agree	Strongly disagree	Agree
40	Male	Married	4-6 Persons	Owned Falt/House	Central (Amman, Zarqa, Madaba, Al-Balqaa)	Smoker	Surgical	Specialist	Jordanian Royal Medical Services	Full-Time	700-1400 JDs	40-48	1-3 on-calls	No	No	No	Very Often	Very Often	Very Often	Often	Very Often	Often	Often	Often	Very Often	Often	Strongly disagree	Neutral/Undecided	Neutral/Undecided	Disagree	Agree
27	Male	Single	4-6 Persons	Owned Falt/House	South (Aqapa, Karak, Maan, Tafileh)	Smoker	Surgical	Resident	Jordanian Royal Medical Services	Full-Time	<700 JDs	>48	>3	Yes	No	No	Always	Always	Always	Always	Rarely	Always	Sometimes	Sometimes	Always	Always	Strongly Agree	Strongly Agree	Strongly Agree	Disagree	Strongly agree
39	Male	Married	4-6 Persons	Owned Falt/House	Central (Amman, Zarqa, Madaba, Al-Balqaa)	Smoker	Medical	Consultant	Jordanian Royal Medical Services	Full-Time	700-1400 JDs	40-48	0	No	No	No	Sometimes	Always	Always	Always	Always	Always	Often	Very Often	Very Often	Always	Strongly disagree	Strongly disagree	Agree	Strongly disagree	Strongly agree
29	Male	Single	4-6 Persons	Owned Falt/House	Central (Amman, Zarqa, Madaba, Al-Balqaa)	Smoker	Surgical	Resident	Jordanian Royal Medical Services	Full-Time	700-1400 JDs	40-48	1-3 on-calls	Yes	No	No	Very Often	Often	Rarely	Never	Never	Sometimes	Rarely	Rarely	Often	Very Often	Agree	Neutral/Undecided	Agree	Agree	Strongly disagree
29	Male	Married	1-3 Persons	Rented Falt/House	North (Irbid, Ajloun, Jerash, Mafraq)	Non-smoker	Surgical	Resident	Jordanian Royal Medical Services	Full-Time	700-1400 JDs	40-48	1-3 on-calls	Yes	No	No	Very Often	Sometimes	Rarely	Rarely	Rarely	Sometimes	Often	Almost Never	Sometimes	Rarely	Disagree	Neutral/Undecided	Agree	Disagree	Neutral/Undecided
29	Male	Single	4-6 Persons	Owned Falt/House	Central (Amman, Zarqa, Madaba, Al-Balqaa)	Smoker	Surgical	Resident	Jordanian Royal Medical Services	Full-Time	700-1400 JDs	40-48	1-3 on-calls	Yes	No	No	Very Often	Often	Rarely	Never	Never	Sometimes	Rarely	Rarely	Often	Very Often	Agree	Neutral/Undecided	Agree	Agree	Strongly disagree
33	Male	Married	1-3 Persons	Rented Falt/House	North (Irbid, Ajloun, Jerash, Mafraq)	Smoker	Medical	Resident	Jordanian Ministry of Health	Full-Time	700-1400 JDs	<40	0	No	No	No	Sometimes	Very Often	Often	Often	Very Often	Often	Often	Rarely	Sometimes	Sometimes	Agree	Neutral/Undecided	Neutral/Undecided	Neutral/Undecided	Neutral/Undecided
28	Male	Single	>6 Persons	Owned Falt/House	North (Irbid, Ajloun, Jerash, Mafraq)	Non-smoker	Medical	Resident	Jordanian Royal Medical Services	Full-Time	<700 JDs	>48	1-3 on-calls	Yes	Yes	No	Very Often	Sometimes	Sometimes	Often	Very Often	Sometimes	Often	Often	Sometimes	Often	Agree	Agree	Agree	Agree	Agree
41	Male	Married	1-3 Persons	Owned Falt/House	Central (Amman, Zarqa, Madaba, Al-Balqaa)	Non-smoker	Medical	Consultant	Jordanian Royal Medical Services	Full-Time	700-1400 JDs	40-48	1-3 on-calls	Yes	No	No	Always	Very Often	Sometimes	Very Often	Almost Never	Sometimes	Often	Sometimes	Rarely	Often	Neutral/undecided	Neutral/Undecided	Agree	Disagree	Neutral/Undecided
26	Male	Single	4-6 Persons	Owned Falt/House	North (Irbid, Ajloun, Jerash, Mafraq)	Smoker	Medical	General Practitioner	Private Hospitals/Clinics	Part-Time	<700 JDs	<40	>3	No	No	No	Often	Very Often	Sometimes	Sometimes	Sometimes	Sometimes	Sometimes	Almost Never	Sometimes	Never	Strongly disagree	Neutral/Undecided	Neutral/Undecided	Strongly agree	Disagree
29	Male	Single	>6 Persons	Owned Falt/House	North (Irbid, Ajloun, Jerash, Mafraq)	Non-smoker	Medical	General Practitioner	Private Hospitals/Clinics	Part-Time	<700 JDs	40-48	0	Yes	No	No	Often	Very Often	Sometimes	Often	Sometimes	Often	Sometimes	Sometimes	Sometimes	Sometimes	Agree	Strongly Agree	Agree	Agree	Neutral/Undecided
25	Male	Single	4-6 Persons	Owned Falt/House	North (Irbid, Ajloun, Jerash, Mafraq)	Smoker	Medical	General Practitioner	Jordanian Royal Medical Services	Part-Time	700-1400 JDs	40-48	1-3 on-calls	Yes	No	No	Sometimes	Sometimes	Sometimes	Rarely	Sometimes	Sometimes	Often	Sometimes	Often	Rarely	Neutral/undecided	Neutral/Undecided	Neutral/Undecided	Agree	Disagree
28	Male	Single	4-6 Persons	Rented Falt/House	Central (Amman, Zarqa, Madaba, Al-Balqaa)	Non-smoker	Medical	General Practitioner	Private Hospitals/Clinics	Full-Time	<700 JDs	>48	1-3 on-calls	Yes	No	Yes	Often	Very Often	Often	Very Often	Very Often	Often	Sometimes	Sometimes	Sometimes	Rarely	Disagree	Neutral/Undecided	Neutral/Undecided	Disagree	Neutral/Undecided
43	Male	Married	4-6 Persons	Owned Falt/House	Central (Amman, Zarqa, Madaba, Al-Balqaa)	Non-smoker	Medical	Consultant	Jordanian Royal Medical Services	Full-Time	>1400 JDs	<40	0	Yes	No	No	Sometimes	Sometimes	Rarely	Almost Never	Rarely	Never	Almost Never	Never	Rarely	Rarely	Neutral/undecided	Neutral/Undecided	Disagree	Agree	Disagree
29	Male	Married	1-3 Persons	Rented Falt/House	North (Irbid, Ajloun, Jerash, Mafraq)	Non-smoker	Surgical	Resident	Jordanian Royal Medical Services	Full-Time	700-1400 JDs	40-48	1-3 on-calls	Yes	No	No	Very Often	Sometimes	Rarely	Rarely	Rarely	Sometimes	Often	Almost Never	Sometimes	Rarely	Disagree	Neutral/Undecided	Agree	Disagree	Neutral/Undecided
40	Male	Married	1-3 Persons	Rented Falt/House	Central (Amman, Zarqa, Madaba, Al-Balqaa)	Non-smoker	Surgical	Specialist	Jordanian Royal Medical Services	Full-Time	700-1400 JDs	<40	1-3 on-calls	Yes	No	No	Sometimes	Often	Often	Often	Often	Often	Sometimes	Sometimes	Rarely	Sometimes	Disagree	Disagree	Disagree	Disagree	Neutral/Undecided
28	Male	Single	4-6 Persons	Owned Falt/House	Central (Amman, Zarqa, Madaba, Al-Balqaa)	Smoker	Medical	Resident	Jordanian Royal Medical Services	Full-Time	700-1400 JDs	>48	>3	No	No	No	Very Often	Sometimes	Never	Sometimes	Never	Never	Very Often	Never	Always	Rarely	Neutral/undecided	Neutral/Undecided	Neutral/Undecided	Strongly disagree	Agree
45	Male	Married	1-3 Persons	Owned Falt/House	Central (Amman, Zarqa, Madaba, Al-Balqaa)	Non-smoker	Surgical	Consultant	Jordanian Royal Medical Services	Full-Time	700-1400 JDs	40-48	0	Yes	No	No	Sometimes	Often	Never	Rarely	Rarely	Rarely	Rarely	Never	Sometimes	Rarely	Agree	Agree	Disagree	Agree	Disagree
30	Male	Married	1-3 Persons	Rented Falt/House	Central (Amman, Zarqa, Madaba, Al-Balqaa)	Smoker	Surgical	Resident	Jordanian Royal Medical Services	Full-Time	700-1400 JDs	>48	>3	No	No	Yes	Always	Often	Often	Very Often	Sometimes	Often	Often	Very Often	Often	Very Often	Disagree	Neutral/Undecided	Strongly Agree	Neutral/Undecided	Agree
33	Male	Married	>6 Persons	Owned Falt/House	Central (Amman, Zarqa, Madaba, Al-Balqaa)	Smoker	Medical	Resident	Jordanian Royal Medical Services	Full-Time	<700 JDs	<40	0	No	No	No	Sometimes	Often	Sometimes	Sometimes	Rarely	Sometimes	Sometimes	Sometimes	Rarely	Sometimes	Agree	Agree	Neutral/Undecided	Neutral/Undecided	Agree
29	Male	Single	1-3 Persons	Owned Falt/House	Central (Amman, Zarqa, Madaba, Al-Balqaa)	Non-smoker	Medical	Resident	Jordanian Royal Medical Services	Full-Time	700-1400 JDs	>48	1-3 on-calls	Yes	No	Yes	Always	Always	Always	Always	Always	Always	Always	Always	Always	Always	Neutral/undecided	Strongly disagree	Strongly Agree	Strongly disagree	Agree
30	Male	Married	1-3 Persons	Owned Falt/House	North (Irbid, Ajloun, Jerash, Mafraq)	Smoker	Medical	Specialist	Private Hospitals/Clinics	Full-Time	>1400 JDs	40-48	0	Yes	No	No	Rarely	Never	Never	Never	Never	Never	Never	Never	Never	Often	Neutral/undecided	Neutral/Undecided	Neutral/Undecided	Neutral/Undecided	Neutral/Undecided
41	Male	Married	1-3 Persons	Owned Falt/House	Central (Amman, Zarqa, Madaba, Al-Balqaa)	Non-smoker	Medical	Consultant	Jordanian Royal Medical Services	Full-Time	700-1400 JDs	40-48	1-3 on-calls	Yes	No	No	Always	Very Often	Sometimes	Very Often	Almost Never	Sometimes	Often	Sometimes	Rarely	Often	Neutral/undecided	Neutral/Undecided	Agree	Disagree	Neutral/Undecided
31	Male	Married	1-3 Persons	Rented Falt/House	Central (Amman, Zarqa, Madaba, Al-Balqaa)	Non-smoker	Surgical	Resident	Jordanian Ministry of Health	Full-Time	700-1400 JDs	>48	1-3 on-calls	No	No	No	Sometimes	Sometimes	Rarely	Rarely	Rarely	Almost Never	Sometimes	Almost Never	Almost Never	Sometimes	Neutral/undecided	Neutral/Undecided	Disagree	Neutral/Undecided	Disagree
32	Male	Single	>6 Persons	Owned Falt/House	Central (Amman, Zarqa, Madaba, Al-Balqaa)	Smoker	Surgical	Resident	Jordanian Ministry of Health	Full-Time	700-1400 JDs	>48	1-3 on-calls	No	Yes	No	Always	Always	Always	Always	Always	Always	Always	Always	Always	Always	Strongly Agree	Strongly Agree	Strongly Agree	Strongly agree	Strongly agree
28	Male	Single	>6 Persons	Rented Falt/House	Central (Amman, Zarqa, Madaba, Al-Balqaa)	Smoker	Surgical	Resident	Jordanian Ministry of Health	Full-Time	<700 JDs	>48	>3	Yes	No	No	Rarely	Sometimes	Sometimes	Sometimes	Rarely	Sometimes	Very Often	Sometimes	Very Often	Sometimes	Neutral/undecided	Agree	Neutral/Undecided	Agree	Neutral/Undecided
33	Male	Married	1-3 Persons	Owned Falt/House	Central (Amman, Zarqa, Madaba, Al-Balqaa)	Non-smoker	Surgical	Resident	Jordanian Ministry of Health	Full-Time	<700 JDs	<40	1-3 on-calls	Yes	No	Yes	Sometimes	Rarely	Never	Never	Never	Never	Almost Never	Never	Never	Never	Agree	Agree	Disagree	Agree	Agree
31	Male	Married	>6 Persons	Owned Falt/House	Central (Amman, Zarqa, Madaba, Al-Balqaa)	Smoker	Surgical	Specialist	Jordanian Ministry of Health	Full-Time	700-1400 JDs	40-48	0	No	No	No	Sometimes	Sometimes	Rarely	Rarely	Rarely	Rarely	Rarely	Rarely	Rarely	Sometimes	Disagree	Neutral/Undecided	Neutral/Undecided	Neutral/Undecided	Neutral/Undecided
32	Male	Married	1-3 Persons	Rented Falt/House	Central (Amman, Zarqa, Madaba, Al-Balqaa)	Smoker	Surgical	Resident	Jordanian Ministry of Health	Full-Time	700-1400 JDs	>48	>3	Yes	Yes	No	Sometimes	Very Often	Often	Very Often	Very Often	Sometimes	Often	Almost Never	Always	Sometimes	Agree	Neutral/Undecided	Neutral/Undecided	Neutral/Undecided	Strongly disagree
29	Male	Single	1-3 Persons	Rented Falt/House	Central (Amman, Zarqa, Madaba, Al-Balqaa)	Non-smoker	Medical	Resident	Jordanian Ministry of Health	Full-Time	<700 JDs	40-48	1-3 on-calls	No	No	No	Very Often	Sometimes	Rarely	Sometimes	Rarely	Almost Never	Sometimes	Almost Never	Rarely	Almost Never	Agree	Neutral/Undecided	Neutral/Undecided	Neutral/Undecided	Neutral/Undecided
35	Male	Married	1-3 Persons	Rented Falt/House	Central (Amman, Zarqa, Madaba, Al-Balqaa)	Non-smoker	Surgical	Resident	Jordanian Ministry of Health	Full-Time	700-1400 JDs	40-48	1-3 on-calls	No	No	No	Sometimes	Sometimes	Rarely	Rarely	Rarely	Sometimes	Almost Never	Almost Never	Rarely	Rarely	Agree	Neutral/Undecided	Disagree	Agree	Disagree
32	Male	Married	1-3 Persons	Owned Falt/House	Central (Amman, Zarqa, Madaba, Al-Balqaa)	Smoker	Surgical	Resident	Jordanian Ministry of Health	Full-Time	700-1400 JDs	>48	1-3 on-calls	No	No	No	Very Often	Often	Rarely	Rarely	Sometimes	Often	Rarely	Sometimes	Often	Sometimes	Agree	Disagree	Neutral/Undecided	Neutral/Undecided	Agree
31	Male	Married	1-3 Persons	Rented Falt/House	Central (Amman, Zarqa, Madaba, Al-Balqaa)	Smoker	Surgical	Resident	Jordanian Ministry of Health	Full-Time	<700 JDs	<40	1-3 on-calls	No	No	No	Always	Always	Always	Always	Sometimes	Sometimes	Very Often	Often	Very Often	Very Often	Strongly disagree	Neutral/Undecided	Agree	Strongly disagree	Strongly agree
37	Male	Married	1-3 Persons	Rented Falt/House	Central (Amman, Zarqa, Madaba, Al-Balqaa)	Non-smoker	Surgical	Specialist	Jordanian Ministry of Health	Full-Time	700-1400 JDs	40-48	1-3 on-calls	Yes	No	No	Always	Sometimes	Very Often	Often	Almost Never	Sometimes	Never	Sometimes	Sometimes	Sometimes	Disagree	Neutral/Undecided	Strongly Agree	Agree	Disagree
29	Male	Married	1-3 Persons	Owned Falt/House	Central (Amman, Zarqa, Madaba, Al-Balqaa)	Non-smoker	Surgical	Resident	Jordanian Ministry of Health	Full-Time	700-1400 JDs	40-48	1-3 on-calls	No	No	Yes	Always	Always	Always	Always	Sometimes	Always	Often	Sometimes	Never	Often	Disagree	Disagree	Agree	Disagree	Agree
30	Male	Married	>6 Persons	Owned Falt/House	Central (Amman, Zarqa, Madaba, Al-Balqaa)	Smoker	Surgical	Resident	Jordanian Ministry of Health	Full-Time	<700 JDs	>48	1-3 on-calls	No	No	No	Always	Very Often	Often	Very Often	Often	Very Often	Very Often	Very Often	Very Often	Very Often	Strongly disagree	Neutral/Undecided	Neutral/Undecided	Strongly disagree	Strongly agree
33	Male	Married	1-3 Persons	Rented Falt/House	Central (Amman, Zarqa, Madaba, Al-Balqaa)	Smoker	Surgical	Specialist	Jordanian Ministry of Health	Full-Time	700-1400 JDs	>48	>3	No	No	No	Very Often	Often	Rarely	Sometimes	Rarely	Sometimes	Almost Never	Rarely	Often	Rarely	Neutral/undecided	Disagree	Disagree	Strongly disagree	Agree
31	Male	Married	1-3 Persons	Rented Falt/House	Central (Amman, Zarqa, Madaba, Al-Balqaa)	Non-smoker	Surgical	Specialist	Jordanian Royal Medical Services	Full-Time	700-1400 JDs	>48	1-3 on-calls	Yes	No	No	Sometimes	Sometimes	Sometimes	Sometimes	Sometimes	Rarely	Sometimes	Rarely	Rarely	Sometimes	Neutral/undecided	Neutral/Undecided	Disagree	Neutral/Undecided	Neutral/Undecided
30	Female	Married	1-3 Persons	Owned Falt/House	North (Irbid, Ajloun, Jerash, Mafraq)	Non-smoker	Medical	Resident	Jordanian Ministry of Health	Full-Time	700-1400 JDs	40-48	0	Yes	No	No	Sometimes	Sometimes	Never	Almost Never	Never	Almost Never	Rarely	Never	Never	Sometimes	Agree	Neutral/Undecided	Disagree	Agree	Strongly disagree
32	Male	Single	4-6 Persons	Rented Falt/House	Central (Amman, Zarqa, Madaba, Al-Balqaa)	Smoker	Surgical	Resident	Jordanian Ministry of Health	Full-Time	700-1400 JDs	40-48	1-3 on-calls	Yes	No	No	Always	Very Often	Very Often	Very Often	Rarely	Very Often	Rarely	Rarely	Often	Rarely	Strongly Agree	Disagree	Disagree	Agree	Disagree
32	Male	Married	1-3 Persons	Owned Falt/House	Central (Amman, Zarqa, Madaba, Al-Balqaa)	Smoker	Surgical	Resident	Jordanian Ministry of Health	Full-Time	700-1400 JDs	<40	>3	Yes	Yes	No	Often	Sometimes	Almost Never	Rarely	Never	Sometimes	Sometimes	Almost Never	Sometimes	Rarely	Agree	Neutral/Undecided	Disagree	Agree	Disagree
30	Male	Married	1-3 Persons	Owned Falt/House	Central (Amman, Zarqa, Madaba, Al-Balqaa)	Non-smoker	Surgical	Resident	Jordanian Ministry of Health	Full-Time	<700 JDs	>48	>3	No	No	No	Always	Always	Sometimes	Often	Never	Often	Sometimes	Almost Never	Always	Sometimes	Neutral/undecided	Neutral/Undecided	Neutral/Undecided	Neutral/Undecided	Neutral/Undecided
30	Male	Married	1-3 Persons	Owned Falt/House	Central (Amman, Zarqa, Madaba, Al-Balqaa)	Non-smoker	Surgical	Resident	Jordanian Ministry of Health	Full-Time	700-1400 JDs	>48	1-3 on-calls	No	No	No	Always	Very Often	Very Often	Often	Sometimes	Rarely	Often	Often	Never	Often	Agree	Agree	Agree	Disagree	Agree
47	Male	Married	>6 Persons	Owned Falt/House	Central (Amman, Zarqa, Madaba, Al-Balqaa)	Smoker	Surgical	Consultant	Private Hospitals/Clinics	Full-Time	>1400 JDs	<40	0	No	No	No	Sometimes	Sometimes	Rarely	Rarely	Rarely	Almost Never	Rarely	Almost Never	Almost Never	Almost Never	Agree	Agree	Disagree	Agree	Disagree
31	Male	Married	1-3 Persons	Rented Falt/House	North (Irbid, Ajloun, Jerash, Mafraq)	Smoker	Surgical	Resident	Jordanian Ministry of Health	Full-Time	700-1400 JDs	>48	1-3 on-calls	Yes	No	No	Sometimes	Very Often	Rarely	Sometimes	Rarely	Rarely	Very Often	Rarely	Almost Never	Almost Never	Neutral/undecided	Agree	Neutral/Undecided	Agree	Disagree
32	Male	Married	1-3 Persons	Rented Falt/House	Central (Amman, Zarqa, Madaba, Al-Balqaa)	Smoker	Medical	Specialist	Jordanian Royal Medical Services	Full-Time	700-1400 JDs	>48	1-3 on-calls	No	No	No	Very Often	Always	Sometimes	Very Often	Often	Often	Sometimes	Never	Sometimes	Rarely	Disagree	Neutral/Undecided	Neutral/Undecided	Disagree	Neutral/Undecided
36	Male	Married	1-3 Persons	Owned Falt/House	Central (Amman, Zarqa, Madaba, Al-Balqaa)	Smoker	Medical	Resident	Jordanian Ministry of Health	Full-Time	700-1400 JDs	>48	0	Yes	No	No	Often	Sometimes	Rarely	Sometimes	Almost Never	Never	Almost Never	Rarely	Almost Never	Often	Neutral/undecided	Neutral/Undecided	Neutral/Undecided	Agree	Neutral/Undecided
29	Male	Single	4-6 Persons	Rented Falt/House	Central (Amman, Zarqa, Madaba, Al-Balqaa)	Smoker	Surgical	Resident	Non-Governmental Organizations	Part-Time	<700 JDs	40-48	1-3 on-calls	Yes	Yes	Yes	Almost Never	Never	Sometimes	Almost Never	Sometimes	Rarely	Often	Sometimes	Sometimes	Sometimes	Agree	Agree	Disagree	Neutral/Undecided	Neutral/Undecided
30	Male	Married	4-6 Persons	Owned Falt/House	Central (Amman, Zarqa, Madaba, Al-Balqaa)	Smoker	Medical	Specialist	Private Hospitals/Clinics	Full-Time	700-1400 JDs	>48	1-3 on-calls	No	No	No	Very Often	Sometimes	Sometimes	Sometimes	Never	Sometimes	Rarely	Never	Rarely	Sometimes	Neutral/undecided	Agree	Neutral/Undecided	Agree	Neutral/Undecided
34	Male	Married	1-3 Persons	Owned Falt/House	Central (Amman, Zarqa, Madaba, Al-Balqaa)	Smoker	Medical	Resident	Jordanian Royal Medical Services	Full-Time	700-1400 JDs	>48	1-3 on-calls	Yes	No	No	Sometimes	Often	Rarely	Sometimes	Almost Never	Rarely	Rarely	Sometimes	Rarely	Rarely	Agree	Neutral/Undecided	Agree	Neutral/Undecided	Neutral/Undecided
34	Male	Married	1-3 Persons	Owned Falt/House	Central (Amman, Zarqa, Madaba, Al-Balqaa)	Smoker	Medical	Resident	Jordanian Royal Medical Services	Full-Time	700-1400 JDs	>48	1-3 on-calls	Yes	No	No	Sometimes	Often	Rarely	Sometimes	Almost Never	Rarely	Rarely	Sometimes	Rarely	Rarely	Agree	Neutral/Undecided	Agree	Neutral/Undecided	Neutral/Undecided
34	Male	Married	1-3 Persons	Owned Falt/House	Central (Amman, Zarqa, Madaba, Al-Balqaa)	Smoker	Medical	Resident	Jordanian Royal Medical Services	Full-Time	700-1400 JDs	>48	1-3 on-calls	Yes	No	No	Sometimes	Often	Rarely	Sometimes	Almost Never	Rarely	Rarely	Sometimes	Rarely	Rarely	Agree	Neutral/Undecided	Agree	Neutral/Undecided	Neutral/Undecided
32	Male	Married	1-3 Persons	Rented Falt/House	Central (Amman, Zarqa, Madaba, Al-Balqaa)	Non-smoker	Medical	Specialist	Jordanian Royal Medical Services	Full-Time	700-1400 JDs	40-48	1-3 on-calls	Yes	No	No	Very Often	Very Often	Often	Often	Sometimes	Rarely	Sometimes	Rarely	Rarely	Sometimes	Agree	Neutral/Undecided	Neutral/Undecided	Agree	Disagree
33	Male	Married	1-3 Persons	Rented Falt/House	Central (Amman, Zarqa, Madaba, Al-Balqaa)	Smoker	Medical	Specialist	Jordanian Royal Medical Services	Full-Time	700-1400 JDs	40-48	1-3 on-calls	Yes	No	No	Always	Often	Rarely	Sometimes	Never	Often	Rarely	Never	Sometimes	Often	Disagree	Neutral/Undecided	Disagree	Neutral/Undecided	Neutral/Undecided
33	Male	Married	1-3 Persons	Rented Falt/House	Central (Amman, Zarqa, Madaba, Al-Balqaa)	Smoker	Medical	Specialist	Jordanian Royal Medical Services	Full-Time	700-1400 JDs	40-48	1-3 on-calls	Yes	No	No	Always	Often	Rarely	Sometimes	Never	Often	Rarely	Never	Sometimes	Often	Disagree	Neutral/Undecided	Disagree	Neutral/Undecided	Neutral/Undecided
30	Male	Single	1-3 Persons	Owned Falt/House	Central (Amman, Zarqa, Madaba, Al-Balqaa)	Non-smoker	Medical	Specialist	Jordanian Royal Medical Services	Full-Time	>1400 JDs	40-48	1-3 on-calls	Yes	No	No	Often	Often	Almost Never	Rarely	Rarely	Rarely	Rarely	Never	Sometimes	Rarely	Agree	Disagree	Neutral/Undecided	Neutral/Undecided	Disagree
36	Male	Married	1-3 Persons	Rented Falt/House	Central (Amman, Zarqa, Madaba, Al-Balqaa)	Smoker	Medical	Specialist	Jordanian Royal Medical Services	Full-Time	700-1400 JDs	>48	1-3 on-calls	Yes	No	No	Always	Sometimes	Often	Always	Almost Never	Always	Almost Never	Almost Never	Very Often	Sometimes	Neutral/undecided	Disagree	Strongly Agree	Neutral/Undecided	Neutral/Undecided
29	Female	Married	1-3 Persons	Owned Falt/House	North (Irbid, Ajloun, Jerash, Mafraq)	Non-smoker	Medical	Resident	Jordanian Royal Medical Services	Full-Time	700-1400 JDs	>48	0	No	No	No	Very Often	Sometimes	Sometimes	Sometimes	Sometimes	Sometimes	Often	Almost Never	Sometimes	Sometimes	Neutral/undecided	Neutral/Undecided	Disagree	Disagree	Neutral/Undecided
35	Male	Married	4-6 Persons	Rented Falt/House	North (Irbid, Ajloun, Jerash, Mafraq)	Smoker	Medical	Specialist	Jordanian Royal Medical Services	Full-Time	700-1400 JDs	>48	>3	No	No	No	Always	Sometimes	Sometimes	Sometimes	Sometimes	Sometimes	Sometimes	Rarely	Often	Sometimes	Neutral/undecided	Neutral/Undecided	Agree	Neutral/Undecided	Neutral/Undecided
33	Male	Married	1-3 Persons	Owned Falt/House	Central (Amman, Zarqa, Madaba, Al-Balqaa)	Smoker	Medical	Specialist	Jordanian Royal Medical Services	Full-Time	>1400 JDs	>48	1-3 on-calls	No	No	No	Always	Often	Often	Always	Often	Often	Often	Sometimes	Rarely	Very Often	Strongly disagree	Disagree	Neutral/Undecided	Neutral/Undecided	Neutral/Undecided
29	Male	Married	1-3 Persons	Rented Falt/House	Central (Amman, Zarqa, Madaba, Al-Balqaa)	Non-smoker	Surgical	Resident	Jordanian Ministry of Health	Full-Time	700-1400 JDs	40-48	1-3 on-calls	Yes	No	No	Often	Often	Rarely	Sometimes	Sometimes	Often	Sometimes	Rarely	Often	Often	Disagree	Agree	Neutral/Undecided	Neutral/Undecided	Neutral/Undecided
34	Male	Single	1-3 Persons	Owned Falt/House	Central (Amman, Zarqa, Madaba, Al-Balqaa)	Smoker	Medical	Resident	Jordanian Ministry of Health	Full-Time	<700 JDs	>48	>3	Yes	No	Yes	Often	Very Often	Often	Often	Sometimes	Sometimes	Sometimes	Rarely	Sometimes	Sometimes	Neutral/undecided	Neutral/Undecided	Agree	Neutral/Undecided	Neutral/Undecided
31	Male	Married	>6 Persons	Owned Falt/House	Central (Amman, Zarqa, Madaba, Al-Balqaa)	Non-smoker	Medical	Resident	Jordanian Ministry of Health	Full-Time	<700 JDs	>48	1-3 on-calls	No	No	No	Always	Always	Always	Always	Always	Always	Always	Always	Always	Always	Strongly disagree	Neutral/Undecided	Strongly Agree	Strongly disagree	Strongly agree
30	Male	Married	1-3 Persons	Owned Falt/House	Central (Amman, Zarqa, Madaba, Al-Balqaa)	Non-smoker	Medical	Resident	Jordanian Royal Medical Services	Full-Time	700-1400 JDs	40-48	1-3 on-calls	Yes	No	No	Often	Sometimes	Rarely	Rarely	Almost Never	Almost Never	Sometimes	Rarely	Rarely	Rarely	Agree	Agree	Neutral/Undecided	Neutral/Undecided	Neutral/Undecided
27	Female	Married	1-3 Persons	Owned Falt/House	Central (Amman, Zarqa, Madaba, Al-Balqaa)	Non-smoker	Medical	Resident	Jordanian Royal Medical Services	Part-Time	<700 JDs	<40	1-3 on-calls	No	No	No	Always	Always	Always	Always	Rarely	Always	Very Often	Rarely	Very Often	Often	Disagree	Agree	Agree	Neutral/Undecided	Disagree
30	Male	Married	1-3 Persons	Rented Falt/House	Central (Amman, Zarqa, Madaba, Al-Balqaa)	Smoker	Surgical	Resident	Jordanian Royal Medical Services	Full-Time	<700 JDs	40-48	1-3 on-calls	No	No	No	Often	Sometimes	Sometimes	Rarely	Sometimes	Sometimes	Sometimes	Sometimes	Rarely	Often	Disagree	Strongly disagree	Agree	Disagree	Agree
33	Male	Married	>6 Persons	Rented Falt/House	North (Irbid, Ajloun, Jerash, Mafraq)	Smoker	Medical	Specialist	Jordanian Royal Medical Services	Full-Time	700-1400 JDs	<40	0	Yes	No	No	Almost Never	Rarely	Sometimes	Sometimes	Often	Often	Sometimes	Rarely	Sometimes	Sometimes	Neutral/undecided	Disagree	Disagree	Disagree	Agree
33	Male	Married	1-3 Persons	Rented Falt/House	North (Irbid, Ajloun, Jerash, Mafraq)	Non-smoker	Medical	Specialist	Jordanian Royal Medical Services	Full-Time	700-1400 JDs	>48	1-3 on-calls	Yes	No	No	Sometimes	Rarely	Sometimes	Almost Never	Never	Sometimes	Never	Rarely	Almost Never	Almost Never	Agree	Disagree	Disagree	Disagree	Disagree
34	Male	Married	4-6 Persons	Owned Falt/House	Central (Amman, Zarqa, Madaba, Al-Balqaa)	Non-smoker	Medical	Specialist	Jordanian Royal Medical Services	Full-Time	700-1400 JDs	<40	>3	Yes	No	No	Sometimes	Sometimes	Sometimes	Sometimes	Never	Sometimes	Sometimes	Almost Never	Sometimes	Almost Never	Neutral/undecided	Neutral/Undecided	Neutral/Undecided	Agree	Agree
32	Male	Married	1-3 Persons	Owned Falt/House	Central (Amman, Zarqa, Madaba, Al-Balqaa)	Smoker	Surgical	Resident	Jordanian Ministry of Health	Full-Time	<700 JDs	>48	>3	Yes	Yes	No	Often	Often	Sometimes	Sometimes	Rarely	Sometimes	Very Often	Rarely	Sometimes	Sometimes	Neutral/undecided	Neutral/Undecided	Neutral/Undecided	Agree	Neutral/Undecided
33	Female	Married	4-6 Persons	Rented Falt/House	Central (Amman, Zarqa, Madaba, Al-Balqaa)	Non-smoker	Medical	General Practitioner	Private Hospitals/Clinics	Full-Time	<700 JDs	<40	1-3 on-calls	No	No	No	Often	Very Often	Sometimes	Sometimes	Almost Never	Very Often	Very Often	Almost Never	Sometimes	Always	Neutral/undecided	Agree	Strongly Agree	Disagree	Neutral/Undecided
31	Male	Single	>6 Persons	Owned Falt/House	North (Irbid, Ajloun, Jerash, Mafraq)	Smoker	Surgical	Resident	Jordanian Ministry of Health	Full-Time	700-1400 JDs	>48	1-3 on-calls	No	No	No	Very Often	Very Often	Often	Very Often	Often	Always	Sometimes	Rarely	Always	Very Often	Agree	Disagree	Neutral/Undecided	Agree	Agree
30	Male	Married	1-3 Persons	Owned Falt/House	Central (Amman, Zarqa, Madaba, Al-Balqaa)	Smoker	Surgical	Resident	Jordanian Ministry of Health	Full-Time	700-1400 JDs	>48	1-3 on-calls	No	No	Yes	Very Often	Often	Sometimes	Often	Often	Often	Sometimes	Sometimes	Almost Never	Rarely	Neutral/undecided	Disagree	Neutral/Undecided	Neutral/Undecided	Agree
26	Female	Single	>6 Persons	Owned Falt/House	Central (Amman, Zarqa, Madaba, Al-Balqaa)	Smoker	Medical	General Practitioner	Private Hospitals/Clinics	Full-Time	<700 JDs	<40	1-3 on-calls	No	No	Yes	Always	Always	Always	Always	Always	Always	Very Often	Always	Always	Always	Strongly disagree	Strongly disagree	Strongly Agree	Disagree	Strongly agree
29	Male	Single	1-3 Persons	Owned Falt/House	Central (Amman, Zarqa, Madaba, Al-Balqaa)	Smoker	Surgical	Resident	Jordanian Ministry of Health	Full-Time	<700 JDs	>48	>3	No	No	No	Sometimes	Often	Sometimes	Sometimes	Rarely	Sometimes	Rarely	Very Often	Sometimes	Sometimes	Disagree	Neutral/Undecided	Disagree	Neutral/Undecided	Disagree
27	Male	Single	1-3 Persons	Owned Falt/House	Central (Amman, Zarqa, Madaba, Al-Balqaa)	Non-smoker	Medical	General Practitioner	Non-Governmental Organizations	Part-Time	<700 JDs	>48	>3	No	No	No	Very Often	Sometimes	Sometimes	Often	Rarely	Sometimes	Often	Rarely	Sometimes	Sometimes	Disagree	Neutral/Undecided	Neutral/Undecided	Agree	Disagree
29	Male	Single	4-6 Persons	Owned Falt/House	North (Irbid, Ajloun, Jerash, Mafraq)	Smoker	Surgical	Resident	Jordanian Ministry of Health	Full-Time	<700 JDs	>48	1-3 on-calls	No	No	No	Very Often	Often	Sometimes	Sometimes	Sometimes	Sometimes	Sometimes	Rarely	Sometimes	Often	Neutral/undecided	Neutral/Undecided	Agree	Disagree	Agree
28	Male	Single	4-6 Persons	Owned Falt/House	Central (Amman, Zarqa, Madaba, Al-Balqaa)	Smoker	Surgical	Resident	Jordanian Ministry of Health	Full-Time	<700 JDs	>48	1-3 on-calls	No	No	No	Very Often	Often	Often	Often	Sometimes	Very Often	Very Often	Often	Very Often	Often	Disagree	Neutral/Undecided	Agree	Disagree	Agree
32	Male	Married	1-3 Persons	Rented Falt/House	North (Irbid, Ajloun, Jerash, Mafraq)	Smoker	Surgical	Resident	Jordanian Ministry of Health	Full-Time	700-1400 JDs	>48	1-3 on-calls	Yes	No	No	Sometimes	Sometimes	Sometimes	Sometimes	Sometimes	Sometimes	Sometimes	Sometimes	Always	Sometimes	Agree	Agree	Agree	Agree	Agree
62	Male	Married	>6 Persons	Owned Falt/House	North (Irbid, Ajloun, Jerash, Mafraq)	Non-smoker	Surgical	Specialist	Private Hospitals/Clinics	Part-Time	700-1400 JDs	<40	0	Yes	No	No	Often	Sometimes	Often	Very Often	Sometimes	Sometimes	Often	Often	Always	Often	Neutral/undecided	Disagree	Neutral/Undecided	Disagree	Neutral/Undecided
32	Male	Married	1-3 Persons	Rented Falt/House	North (Irbid, Ajloun, Jerash, Mafraq)	Smoker	Surgical	Resident	Jordanian Ministry of Health	Full-Time	<700 JDs	>48	1-3 on-calls	No	No	No	Always	Very Often	Very Often	Always	Very Often	Always	Very Often	Always	Always	Always	Strongly disagree	Strongly disagree	Strongly Agree	Neutral/Undecided	Strongly agree
25	Male	Single	1-3 Persons	Owned Falt/House	Central (Amman, Zarqa, Madaba, Al-Balqaa)	Non-smoker	Medical	General Practitioner	Jordanian Ministry of Health	Full-Time	<700 JDs	<40	0	Yes	No	No	Very Often	Often	Sometimes	Very Often	Sometimes	Very Often	Very Often	Very Often	Always	Always	Neutral/undecided	Neutral/Undecided	Agree	Disagree	Neutral/Undecided
25	Male	Single	>6 Persons	Owned Falt/House	North (Irbid, Ajloun, Jerash, Mafraq)	Smoker	Medical	General Practitioner	Jordanian Ministry of Health	Part-Time	<700 JDs	<40	0	No	No	No	Often	Often	Very Often	Rarely	Often	Sometimes	Sometimes	Almost Never	Rarely	Often	Neutral/undecided	Disagree	Agree	Neutral/Undecided	Disagree
29	Male	Single	>6 Persons	Rented Falt/House	Central (Amman, Zarqa, Madaba, Al-Balqaa)	Non-smoker	Medical	General Practitioner	Private Hospitals/Clinics	Part-Time	<700 JDs	>48	0	Yes	No	No	Sometimes	Often	Rarely	Often	Rarely	Rarely	Sometimes	Almost Never	Often	Sometimes	Neutral/undecided	Neutral/Undecided	Disagree	Disagree	Agree
32	Male	Married	4-6 Persons	Owned Falt/House	North (Irbid, Ajloun, Jerash, Mafraq)	Non-smoker	Surgical	Resident	Jordanian Ministry of Health	Full-Time	700-1400 JDs	>48	1-3 on-calls	No	No	No	Sometimes	Very Often	Often	Rarely	Sometimes	Often	Rarely	Rarely	Sometimes	Rarely	Agree	Agree	Agree	Agree	Disagree
30	Female	Single	>6 Persons	Owned Falt/House	Central (Amman, Zarqa, Madaba, Al-Balqaa)	Smoker	Medical	Resident	Jordanian Ministry of Health	Full-Time	700-1400 JDs	>48	1-3 on-calls	No	No	No	Very Often	Often	Very Often	Always	Very Often	Always	Very Often	Sometimes	Sometimes	Very Often	Disagree	Neutral/Undecided	Agree	Disagree	Agree
30	Male	Single	4-6 Persons	Owned Falt/House	North (Irbid, Ajloun, Jerash, Mafraq)	Smoker	Surgical	Resident	Jordanian Ministry of Health	Full-Time	<700 JDs	>48	1-3 on-calls	Yes	Yes	No	Sometimes	Sometimes	Sometimes	Sometimes	Sometimes	Sometimes	Sometimes	Sometimes	Sometimes	Sometimes	Agree	Agree	Agree	Agree	Agree
37	Male	Single	1-3 Persons	Owned Falt/House	North (Irbid, Ajloun, Jerash, Mafraq)	Smoker	Surgical	Resident	Jordanian Ministry of Health	Full-Time	<700 JDs	>48	1-3 on-calls	No	No	No	Very Often	Always	Always	Always	Always	Always	Always	Very Often	Always	Very Often	Disagree	Neutral/Undecided	Agree	Disagree	Agree
31	Male	Married	4-6 Persons	Rented Falt/House	Central (Amman, Zarqa, Madaba, Al-Balqaa)	Smoker	Medical	Resident	Jordanian Ministry of Health	Full-Time	700-1400 JDs	40-48	1-3 on-calls	No	No	No	Very Often	Very Often	Often	Often	Very Often	Very Often	Sometimes	Often	Rarely	Often	Agree	Agree	Agree	Disagree	Agree
30	Female	Single	4-6 Persons	Owned Falt/House	Central (Amman, Zarqa, Madaba, Al-Balqaa)	Non-smoker	Medical	Resident	Jordanian Ministry of Health	Full-Time	<700 JDs	<40	1-3 on-calls	No	No	No	Always	Always	Always	Always	Often	Always	Very Often	Often	Often	Very Often	Disagree	Strongly disagree	Agree	Neutral/Undecided	Neutral/Undecided
32	Male	Married	1-3 Persons	Rented Falt/House	Central (Amman, Zarqa, Madaba, Al-Balqaa)	Non-smoker	Surgical	Resident	Jordanian Ministry of Health	Full-Time	700-1400 JDs	>48	>3	Yes	No	No	Always	Often	Very Often	Always	Very Often	Sometimes	Sometimes	Rarely	Rarely	Very Often	Neutral/undecided	Disagree	Agree	Disagree	Agree
34	Male	Married	4-6 Persons	Rented Falt/House	North (Irbid, Ajloun, Jerash, Mafraq)	Smoker	Surgical	Resident	Jordanian Ministry of Health	Full-Time	<700 JDs	>48	1-3 on-calls	Yes	No	No	Always	Always	Very Often	Rarely	Never	Rarely	Sometimes	Almost Never	Rarely	Almost Never	Neutral/undecided	Neutral/Undecided	Agree	Neutral/Undecided	Disagree
29	Male	Single	4-6 Persons	Owned Falt/House	North (Irbid, Ajloun, Jerash, Mafraq)	Non-smoker	Surgical	Resident	Jordanian Ministry of Health	Full-Time	<700 JDs	>48	1-3 on-calls	No	No	No	Sometimes	Sometimes	Sometimes	Often	Rarely	Sometimes	Sometimes	Never	Rarely	Sometimes	Neutral/undecided	Neutral/Undecided	Neutral/Undecided	Agree	Disagree
38	Male	Married	>6 Persons	Rented Falt/House	Central (Amman, Zarqa, Madaba, Al-Balqaa)	Non-smoker	Medical	Resident	Jordanian Ministry of Health	Full-Time	<700 JDs	>48	1-3 on-calls	Yes	No	No	Very Often	Often	Often	Often	Often	Often	Often	Sometimes	Often	Often	Neutral/undecided	Agree	Strongly Agree	Neutral/Undecided	Agree
30	Female	Single	1-3 Persons	Owned Falt/House	Central (Amman, Zarqa, Madaba, Al-Balqaa)	Smoker	Surgical	Resident	Jordanian Royal Medical Services	Full-Time	<700 JDs	40-48	1-3 on-calls	No	No	No	Always	Very Often	Very Often	Always	Sometimes	Always	Often	Sometimes	Often	Often	Disagree	Disagree	Strongly Agree	Neutral/Undecided	Agree
30	Male	Married	1-3 Persons	Owned Falt/House	Central (Amman, Zarqa, Madaba, Al-Balqaa)	Non-smoker	Surgical	Resident	Jordanian Ministry of Health	Full-Time	700-1400 JDs	>48	1-3 on-calls	No	No	Yes	Often	Very Often	Sometimes	Often	Sometimes	Sometimes	Often	Sometimes	Sometimes	Sometimes	Neutral/undecided	Neutral/Undecided	Disagree	Neutral/Undecided	Neutral/Undecided
31	Male	Married	1-3 Persons	Rented Falt/House	North (Irbid, Ajloun, Jerash, Mafraq)	Non-smoker	Surgical	Resident	Jordanian Ministry of Health	Full-Time	<700 JDs	>48	1-3 on-calls	No	No	No	Sometimes	Often	Rarely	Sometimes	Sometimes	Sometimes	Sometimes	Never	Sometimes	Almost Never	Neutral/undecided	Neutral/Undecided	Agree	Agree	Neutral/Undecided
31	Male	Married	1-3 Persons	Rented Falt/House	North (Irbid, Ajloun, Jerash, Mafraq)	Non-smoker	Surgical	Resident	Jordanian Ministry of Health	Full-Time	<700 JDs	>48	1-3 on-calls	No	No	No	Sometimes	Often	Rarely	Sometimes	Sometimes	Sometimes	Sometimes	Never	Sometimes	Almost Never	Neutral/undecided	Neutral/Undecided	Agree	Agree	Neutral/Undecided
73	Male	Married	1-3 Persons	Owned Falt/House	Central (Amman, Zarqa, Madaba, Al-Balqaa)	Smoker	Medical	Consultant	Private Hospitals/Clinics	Part-Time	>1400 JDs	<40	0	Yes	No	No	Sometimes	Sometimes	Rarely	Rarely	Rarely	Rarely	Sometimes	Almost Never	Sometimes	Rarely	Strongly Agree	Agree	Disagree	Strongly agree	Strongly disagree
32	Male	Single	1-3 Persons	Rented Falt/House	Central (Amman, Zarqa, Madaba, Al-Balqaa)	Smoker	Medical	General Practitioner	Jordanian Ministry of Health	Full-Time	700-1400 JDs	40-48	1-3 on-calls	Yes	No	No	Very Often	Very Often	Very Often	Very Often	Very Often	Very Often	Often	Often	Sometimes	Sometimes	Agree	Disagree	Agree	Disagree	Disagree
32	Female	Married	4-6 Persons	Owned Falt/House	Central (Amman, Zarqa, Madaba, Al-Balqaa)	Non-smoker	Medical	Specialist	Jordanian Ministry of Health	Full-Time	700-1400 JDs	40-48	0	Yes	No	No	Often	Very Often	Sometimes	Very Often	Sometimes	Sometimes	Often	Sometimes	Sometimes	Often	Disagree	Neutral/Undecided	Disagree	Neutral/Undecided	Neutral/Undecided
37	Male	Single	4-6 Persons	Owned Falt/House	Central (Amman, Zarqa, Madaba, Al-Balqaa)	Smoker	Medical	Resident	Jordanian Ministry of Health	Full-Time	700-1400 JDs	40-48	1-3 on-calls	No	No	No	Often	Often	Sometimes	Sometimes	Sometimes	Sometimes	Sometimes	Sometimes	Rarely	Rarely	Neutral/undecided	Agree	Neutral/Undecided	Neutral/Undecided	Neutral/Undecided
30	Female	Married	4-6 Persons	Rented Falt/House	Central (Amman, Zarqa, Madaba, Al-Balqaa)	Non-smoker	Medical	Resident	Jordanian Ministry of Health	Full-Time	<700 JDs	<40	0	No	No	No	Always	Always	Always	Always	Always	Always	Often	Sometimes	Rarely	Often	Strongly disagree	Strongly disagree	Agree	Strongly disagree	Strongly agree
29	Male	Single	>6 Persons	Owned Falt/House	Central (Amman, Zarqa, Madaba, Al-Balqaa)	Non-smoker	Medical	Resident	Jordanian Ministry of Health	Full-Time	700-1400 JDs	40-48	1-3 on-calls	No	No	No	Sometimes	Very Often	Sometimes	Sometimes	Rarely	Sometimes	Rarely	Rarely	Sometimes	Sometimes	Disagree	Neutral/Undecided	Neutral/Undecided	Neutral/Undecided	Disagree
32	Male	Married	1-3 Persons	Owned Falt/House	North (Irbid, Ajloun, Jerash, Mafraq)	Smoker	Medical	Resident	Jordanian Ministry of Health	Full-Time	700-1400 JDs	>48	0	No	No	Yes	Always	Often	Sometimes	Sometimes	Sometimes	Sometimes	Often	Rarely	Often	Sometimes	Disagree	Neutral/Undecided	Agree	Disagree	Agree
29	Male	Married	1-3 Persons	Owned Falt/House	North (Irbid, Ajloun, Jerash, Mafraq)	Smoker	Surgical	Resident	Jordanian Ministry of Health	Full-Time	700-1400 JDs	>48	>3	No	No	Yes	Often	Sometimes	Rarely	Often	Rarely	Rarely	Almost Never	Rarely	Often	Always	Agree	Neutral/Undecided	Agree	Neutral/Undecided	Neutral/Undecided
28	Male	Single	>6 Persons	Owned Falt/House	North (Irbid, Ajloun, Jerash, Mafraq)	Non-smoker	Surgical	Resident	Jordanian Ministry of Health	Full-Time	<700 JDs	>48	1-3 on-calls	No	No	No	Always	Always	Always	Always	Always	Always	Often	Never	Always	Always	Strongly disagree	Strongly disagree	Strongly Agree	Strongly disagree	Strongly agree
32	Male	Married	1-3 Persons	Owned Falt/House	North (Irbid, Ajloun, Jerash, Mafraq)	Smoker	Surgical	Resident	Jordanian Ministry of Health	Full-Time	700-1400 JDs	>48	1-3 on-calls	No	No	No	Very Often	Always	Always	Always	Almost Never	Very Often	Very Often	Never	Almost Never	Very Often	Strongly disagree	Strongly disagree	Agree	Neutral/Undecided	Agree
27	Male	Single	>6 Persons	Owned Falt/House	South (Aqapa, Karak, Maan, Tafileh)	Non-smoker	Medical	General Practitioner	Private Hospitals/Clinics	Part-Time	<700 JDs	<40	0	No	No	No	Often	Sometimes	Always	Always	Rarely	Always	Sometimes	Sometimes	Often	Sometimes	Disagree	Disagree	Strongly Agree	Neutral/Undecided	Neutral/Undecided
31	Female	Single	>6 Persons	Owned Falt/House	Central (Amman, Zarqa, Madaba, Al-Balqaa)	Non-smoker	Medical	Resident	Jordanian Ministry of Health	Full-Time	<700 JDs	<40	1-3 on-calls	No	No	No	Sometimes	Often	Sometimes	Sometimes	Sometimes	Sometimes	Sometimes	Rarely	Never	Rarely	Neutral/undecided	Neutral/Undecided	Disagree	Neutral/Undecided	Neutral/Undecided
26	Male	Single	4-6 Persons	Owned Falt/House	Central (Amman, Zarqa, Madaba, Al-Balqaa)	Smoker	Medical	General Practitioner	Jordanian Ministry of Health	Full-Time	<700 JDs	>48	0	No	No	No	Very Often	Very Often	Very Often	Very Often	Very Often	Always	Very Often	Often	Often	Very Often	Disagree	Disagree	Strongly Agree	Neutral/Undecided	Agree
29	Male	Married	1-3 Persons	Rented Falt/House	Central (Amman, Zarqa, Madaba, Al-Balqaa)	Smoker	Surgical	Resident	Jordanian Ministry of Health	Full-Time	<700 JDs	>48	1-3 on-calls	No	No	No	Always	Always	Sometimes	Sometimes	Sometimes	Often	Sometimes	Rarely	Never	Rarely	Strongly disagree	Neutral/Undecided	Agree	Agree	Neutral/Undecided
42	Male	Single	1-3 Persons	Owned Falt/House	Central (Amman, Zarqa, Madaba, Al-Balqaa)	Smoker	Medical	General Practitioner	Private Hospitals/Clinics	Full-Time	<700 JDs	>48	>3	Yes	No	No	Almost Never	Almost Never	Almost Never	Almost Never	Almost Never	Almost Never	Almost Never	Almost Never	Almost Never	Almost Never	Agree	Agree	Agree	Strongly agree	Agree
26	Female	Single	4-6 Persons	Owned Falt/House	Central (Amman, Zarqa, Madaba, Al-Balqaa)	Smoker	Medical	General Practitioner	Private Hospitals/Clinics	Part-Time	<700 JDs	40-48	1-3 on-calls	Yes	No	Yes	Sometimes	Almost Never	Rarely	Sometimes	Never	Rarely	Rarely	Almost Never	Sometimes	Rarely	Neutral/undecided	Neutral/Undecided	Neutral/Undecided	Neutral/Undecided	Neutral/Undecided
42	Male	Single	1-3 Persons	Owned Falt/House	Central (Amman, Zarqa, Madaba, Al-Balqaa)	Smoker	Surgical	Specialist	Jordanian Ministry of Health	Full-Time	700-1400 JDs	>48	1-3 on-calls	No	No	Yes	Always	Always	Very Often	Very Often	Always	Always	Very Often	Sometimes	Always	Always	Disagree	Disagree	Agree	Disagree	Strongly agree
30	Male	Married	4-6 Persons	Rented Falt/House	North (Irbid, Ajloun, Jerash, Mafraq)	Smoker	Surgical	Resident	Jordanian Ministry of Health	Full-Time	700-1400 JDs	>48	1-3 on-calls	No	No	No	Always	Always	Always	Always	Sometimes	Sometimes	Often	Sometimes	Very Often	Sometimes	Neutral/undecided	Neutral/Undecided	Agree	Neutral/Undecided	Neutral/Undecided
32	Female	Married	1-3 Persons	Owned Falt/House	Central (Amman, Zarqa, Madaba, Al-Balqaa)	Smoker	Surgical	Resident	Jordanian Royal Medical Services	Full-Time	<700 JDs	>48	>3	No	No	No	Always	Sometimes	Sometimes	Sometimes	Often	Sometimes	Very Often	Rarely	Very Often	Sometimes	Disagree	Neutral/Undecided	Neutral/Undecided	Agree	Neutral/Undecided
26	Female	Single	4-6 Persons	Owned Falt/House	Central (Amman, Zarqa, Madaba, Al-Balqaa)	Non-smoker	Medical	Resident	Jordanian Ministry of Health	Full-Time	<700 JDs	<40	0	No	No	No	Rarely	Sometimes	Sometimes	Sometimes	Rarely	Rarely	Rarely	Rarely	Rarely	Sometimes	Neutral/undecided	Neutral/Undecided	Disagree	Neutral/Undecided	Neutral/Undecided
26	Male	Single	>6 Persons	Owned Falt/House	Central (Amman, Zarqa, Madaba, Al-Balqaa)	Non-smoker	Medical	Resident	Private Hospitals/Clinics	Full-Time	<700 JDs	>48	1-3 on-calls	Yes	No	No	Sometimes	Sometimes	Rarely	Rarely	Rarely	Rarely	Sometimes	Rarely	Rarely	Rarely	Agree	Agree	Disagree	Agree	Disagree
31	Male	Married	1-3 Persons	Owned Falt/House	Central (Amman, Zarqa, Madaba, Al-Balqaa)	Non-smoker	Medical	Specialist	Jordanian Ministry of Health	Full-Time	700-1400 JDs	40-48	1-3 on-calls	Yes	No	No	Often	Very Often	Very Often	Often	Sometimes	Sometimes	Very Often	Sometimes	Rarely	Rarely	Agree	Strongly Agree	Neutral/Undecided	Agree	Disagree
31	Male	Single	1-3 Persons	Owned Falt/House	Central (Amman, Zarqa, Madaba, Al-Balqaa)	Smoker	Medical	Specialist	Jordanian Royal Medical Services	Full-Time	700-1400 JDs	40-48	0	No	No	No	Rarely	Sometimes	Sometimes	Sometimes	Often	Rarely	Almost Never	Rarely	Sometimes	Often	Neutral/undecided	Neutral/Undecided	Agree	Neutral/Undecided	Disagree
26	Male	Single	>6 Persons	Owned Falt/House	Central (Amman, Zarqa, Madaba, Al-Balqaa)	Smoker	Medical	General Practitioner	Private Hospitals/Clinics	Part-Time	<700 JDs	40-48	0	No	No	No	Very Often	Rarely	Rarely	Sometimes	Rarely	Sometimes	Very Often	Rarely	Often	Often	Disagree	Neutral/Undecided	Neutral/Undecided	Neutral/Undecided	Neutral/Undecided
27	Male	Married	1-3 Persons	Rented Falt/House	North (Irbid, Ajloun, Jerash, Mafraq)	Non-smoker	Surgical	Resident	Jordanian Ministry of Health	Full-Time	700-1400 JDs	>48	1-3 on-calls	No	No	Yes	Very Often	Often	Sometimes	Sometimes	Sometimes	Sometimes	Sometimes	Sometimes	Very Often	Sometimes	Strongly Agree	Neutral/Undecided	Neutral/Undecided	Neutral/Undecided	Strongly disagree
36	Male	Married	4-6 Persons	Rented Falt/House	Central (Amman, Zarqa, Madaba, Al-Balqaa)	Smoker	Medical	Specialist	Jordanian Ministry of Health	Part-Time	700-1400 JDs	>48	1-3 on-calls	Yes	Yes	Yes	Sometimes	Sometimes	Often	Rarely	Very Often	Sometimes	Rarely	Often	Almost Never	Sometimes	Disagree	Neutral/Undecided	Agree	Strongly disagree	Agree
32	Male	Single	4-6 Persons	Owned Falt/House	North (Irbid, Ajloun, Jerash, Mafraq)	Smoker	Surgical	Resident	Jordanian Ministry of Health	Full-Time	700-1400 JDs	>48	1-3 on-calls	No	No	No	Always	Always	Always	Always	Always	Always	Always	Always	Always	Always	Strongly disagree	Strongly disagree	Strongly Agree	Strongly disagree	Strongly agree
31	Male	Single	4-6 Persons	Owned Falt/House	Central (Amman, Zarqa, Madaba, Al-Balqaa)	Non-smoker	Surgical	Resident	Jordanian Ministry of Health	Full-Time	<700 JDs	>48	>3	No	No	Yes	Always	Very Often	Sometimes	Often	Very Often	Very Often	Always	Sometimes	Always	Often	Neutral/undecided	Neutral/Undecided	Agree	Neutral/Undecided	Disagree
27	Male	Married	>6 Persons	Rented Falt/House	Central (Amman, Zarqa, Madaba, Al-Balqaa)	Non-smoker	Medical	General Practitioner	Non-Governmental Organizations	Full-Time	700-1400 JDs	40-48	1-3 on-calls	Yes	No	No	Sometimes	Often	Often	Sometimes	Sometimes	Often	Sometimes	Rarely	Sometimes	Almost Never	Agree	Neutral/Undecided	Disagree	Disagree	Agree
32	Female	Married	1-3 Persons	Owned Falt/House	Central (Amman, Zarqa, Madaba, Al-Balqaa)	Smoker	Surgical	Resident	Jordanian Royal Medical Services	Full-Time	<700 JDs	>48	>3	No	No	No	Always	Sometimes	Sometimes	Sometimes	Often	Sometimes	Very Often	Rarely	Very Often	Sometimes	Disagree	Neutral/Undecided	Neutral/Undecided	Agree	Neutral/Undecided
26	Male	Single	1-3 Persons	Rented Falt/House	North (Irbid, Ajloun, Jerash, Mafraq)	Smoker	Surgical	Resident	Jordanian Ministry of Health	Full-Time	<700 JDs	>48	1-3 on-calls	Yes	No	No	Very Often	Very Often	Very Often	Very Often	Very Often	Very Often	Very Often	Very Often	Always	Very Often	Neutral/undecided	Neutral/Undecided	Agree	Disagree	Strongly agree
38	Male	Married	1-3 Persons	Rented Falt/House	North (Irbid, Ajloun, Jerash, Mafraq)	Non-smoker	Surgical	Specialist	Jordanian Ministry of Health	Full-Time	700-1400 JDs	>48	1-3 on-calls	No	No	No	Sometimes	Very Often	Often	Often	Often	Very Often	Sometimes	Often	Very Often	Often	Disagree	Strongly disagree	Neutral/Undecided	Disagree	Disagree
32	Male	Married	1-3 Persons	Owned Falt/House	Central (Amman, Zarqa, Madaba, Al-Balqaa)	Smoker	Surgical	Specialist	Jordanian Royal Medical Services	Full-Time	700-1400 JDs	>48	1-3 on-calls	Yes	No	Yes	Sometimes	Sometimes	Rarely	Rarely	Rarely	Rarely	Rarely	Almost Never	Always	Rarely	Agree	Agree	Disagree	Agree	Strongly disagree
30	Male	Married	>6 Persons	Owned Falt/House	North (Irbid, Ajloun, Jerash, Mafraq)	Smoker	Surgical	Resident	Jordanian Ministry of Health	Full-Time	700-1400 JDs	>48	>3	No	No	No	Always	Always	Always	Always	Sometimes	Always	Always	Always	Always	Always	Strongly disagree	Strongly disagree	Neutral/Undecided	Strongly disagree	Strongly agree
25	Male	Single	4-6 Persons	Owned Falt/House	Central (Amman, Zarqa, Madaba, Al-Balqaa)	Smoker	Medical	General Practitioner	Private Hospitals/Clinics	Part-Time	<700 JDs	>48	0	Yes	No	No	Often	Always	Often	Rarely	Rarely	Rarely	Sometimes	Almost Never	Very Often	Sometimes	Strongly disagree	Disagree	Neutral/Undecided	Disagree	Neutral/Undecided
32	Female	Married	4-6 Persons	Rented Falt/House	South (Aqapa, Karak, Maan, Tafileh)	Non-smoker	Medical	Resident	Jordanian Ministry of Health	Full-Time	<700 JDs	40-48	0	No	No	No	Sometimes	Very Often	Sometimes	Often	Often	Often	Sometimes	Sometimes	Sometimes	Sometimes	Neutral/undecided	Neutral/Undecided	Agree	Neutral/Undecided	Neutral/Undecided
29	Male	Single	1-3 Persons	Owned Falt/House	Central (Amman, Zarqa, Madaba, Al-Balqaa)	Non-smoker	Medical	General Practitioner	Private Hospitals/Clinics	Part-Time	<700 JDs	<40	>3	No	No	No	Often	Very Often	Very Often	Often	Rarely	Sometimes	Sometimes	Never	Often	Sometimes	Disagree	Agree	Disagree	Agree	Neutral/Undecided
29	Male	Married	4-6 Persons	Rented Falt/House	Central (Amman, Zarqa, Madaba, Al-Balqaa)	Smoker	Surgical	Resident	Jordanian Ministry of Health	Full-Time	<700 JDs	>48	1-3 on-calls	No	No	Yes	Always	Very Often	Always	Sometimes	Sometimes	Very Often	Sometimes	Sometimes	Sometimes	Sometimes	Neutral/undecided	Neutral/Undecided	Neutral/Undecided	Disagree	Neutral/Undecided
28	Female	Single	>6 Persons	Rented Falt/House	Central (Amman, Zarqa, Madaba, Al-Balqaa)	Non-smoker	Surgical	Resident	Jordanian Ministry of Health	Full-Time	<700 JDs	>48	0	Yes	No	Yes	Sometimes	Sometimes	Sometimes	Rarely	Sometimes	Rarely	Almost Never	Almost Never	Sometimes	Sometimes	Neutral/undecided	Neutral/Undecided	Neutral/Undecided	Neutral/Undecided	Disagree
26	Male	Single	4-6 Persons	Owned Falt/House	North (Irbid, Ajloun, Jerash, Mafraq)	Non-smoker	Medical	General Practitioner	Private Hospitals/Clinics	Part-Time	<700 JDs	<40	0	Yes	No	No	Often	Often	Sometimes	Sometimes	Almost Never	Often	Often	Sometimes	Sometimes	Sometimes	Strongly disagree	Neutral/Undecided	Neutral/Undecided	Agree	Neutral/Undecided
60	Female	Married	4-6 Persons	Owned Falt/House	North (Irbid, Ajloun, Jerash, Mafraq)	Non-smoker	Medical	Consultant	Jordanian Ministry of Health	Part-Time	700-1400 JDs	40-48	0	Yes	No	No	Sometimes	Sometimes	Sometimes	Sometimes	Sometimes	Almost Never	Sometimes	Almost Never	Often	Rarely	Agree	Agree	Disagree	Strongly agree	Strongly disagree
32	Male	Married	1-3 Persons	Rented Falt/House	North (Irbid, Ajloun, Jerash, Mafraq)	Smoker	Surgical	Resident	Jordanian Ministry of Health	Full-Time	<700 JDs	>48	>3	No	No	Yes	Always	Very Often	Very Often	Often	Always	Very Often	Sometimes	Sometimes	Always	Often	Agree	Neutral/Undecided	Agree	Agree	Neutral/Undecided
29	Female	Married	>6 Persons	Owned Falt/House	Central (Amman, Zarqa, Madaba, Al-Balqaa)	Non-smoker	Surgical	Resident	Private Hospitals/Clinics	Full-Time	<700 JDs	>48	>3	No	No	No	Very Often	Very Often	Very Often	Always	Very Often	Always	Very Often	Often	Very Often	Very Often	Strongly disagree	Neutral/Undecided	Agree	Strongly agree	Agree
28	Male	Married	1-3 Persons	Owned Falt/House	Central (Amman, Zarqa, Madaba, Al-Balqaa)	Non-smoker	Surgical	Resident	Jordanian Ministry of Health	Full-Time	700-1400 JDs	>48	1-3 on-calls	No	No	No	Very Often	Sometimes	Often	Often	Very Often	Sometimes	Sometimes	Sometimes	Sometimes	Sometimes	Disagree	Disagree	Neutral/Undecided	Disagree	Agree
27	Male	Married	>6 Persons	Owned Falt/House	Central (Amman, Zarqa, Madaba, Al-Balqaa)	Non-smoker	Medical	Specialist	Jordanian Ministry of Health	Part-Time	<700 JDs	<40	0	No	No	No	Very Often	Rarely	Always	Rarely	Very Often	Very Often	Sometimes	Sometimes	Sometimes	Always	Neutral/undecided	Neutral/Undecided	Neutral/Undecided	Neutral/Undecided	Neutral/Undecided
30	Male	Single	>6 Persons	Owned Falt/House	Central (Amman, Zarqa, Madaba, Al-Balqaa)	Smoker	Surgical	Resident	Jordanian Ministry of Health	Full-Time	<700 JDs	>48	1-3 on-calls	No	No	No	Very Often	Very Often	Sometimes	Sometimes	Rarely	Sometimes	Sometimes	Rarely	Often	Rarely	Agree	Agree	Neutral/Undecided	Agree	Disagree
30	Male	Married	1-3 Persons	Owned Falt/House	North (Irbid, Ajloun, Jerash, Mafraq)	Non-smoker	Medical	Resident	Jordanian Royal Medical Services	Full-Time	700-1400 JDs	>48	1-3 on-calls	No	No	No	Always	Sometimes	Always	Always	Never	Always	Sometimes	Never	Very Often	Always	Disagree	Neutral/Undecided	Agree	Disagree	Agree
60	Male	Married	>6 Persons	Owned Falt/House	Central (Amman, Zarqa, Madaba, Al-Balqaa)	Non-smoker	Surgical	Consultant	Private Hospitals/Clinics	Full-Time	700-1400 JDs	<40	1-3 on-calls	Yes	No	No	Often	Sometimes	Rarely	Sometimes	Rarely	Sometimes	Very Often	Rarely	Very Often	Very Often	Agree	Agree	Agree	Strongly disagree	Agree
35	Male	Married	>6 Persons	Rented Falt/House	Central (Amman, Zarqa, Madaba, Al-Balqaa)	Smoker	Medical	Resident	Jordanian Ministry of Health	Full-Time	<700 JDs	<40	1-3 on-calls	No	No	No	Always	Very Often	Very Often	Always	Very Often	Very Often	Often	Very Often	Always	Very Often	Disagree	Neutral/Undecided	Strongly Agree	Agree	Agree
32	Female	Married	1-3 Persons	Owned Falt/House	Central (Amman, Zarqa, Madaba, Al-Balqaa)	Non-smoker	Medical	Resident	Jordanian Ministry of Health	Full-Time	700-1400 JDs	<40	1-3 on-calls	No	No	Yes	Very Often	Sometimes	Often	Often	Often	Often	Often	Often	Sometimes	Often	Neutral/undecided	Neutral/Undecided	Neutral/Undecided	Disagree	Agree
28	Male	Married	1-3 Persons	Owned Falt/House	Central (Amman, Zarqa, Madaba, Al-Balqaa)	Smoker	Surgical	Resident	Jordanian Royal Medical Services	Full-Time	<700 JDs	>48	1-3 on-calls	No	No	No	Always	Always	Always	Always	Always	Always	Always	Always	Always	Always	Disagree	Neutral/Undecided	Agree	Neutral/Undecided	Neutral/Undecided
32	Male	Married	1-3 Persons	Rented Falt/House	Central (Amman, Zarqa, Madaba, Al-Balqaa)	Smoker	Surgical	Resident	Jordanian Ministry of Health	Full-Time	<700 JDs	>48	>3	No	No	No	Always	Always	Always	Always	Sometimes	Always	Often	Never	Sometimes	Sometimes	Neutral/undecided	Neutral/Undecided	Strongly Agree	Neutral/Undecided	Agree
58	Male	Married	4-6 Persons	Owned Falt/House	North (Irbid, Ajloun, Jerash, Mafraq)	Smoker	Medical	Specialist	Jordanian Ministry of Health	Full-Time	>1400 JDs	40-48	0	No	No	No	Rarely	Sometimes	Never	Never	Rarely	Never	Sometimes	Never	Often	Almost Never	Agree	Neutral/Undecided	Neutral/Undecided	Agree	Strongly disagree
29	Male	Married	1-3 Persons	Rented Falt/House	Central (Amman, Zarqa, Madaba, Al-Balqaa)	Non-smoker	Surgical	Resident	Jordanian Ministry of Health	Full-Time	<700 JDs	>48	1-3 on-calls	No	No	No	Always	Always	Often	Always	Very Often	Rarely	Sometimes	Never	Never	Rarely	Disagree	Neutral/Undecided	Neutral/Undecided	Agree	Disagree
33	Male	Married	1-3 Persons	Rented Falt/House	Central (Amman, Zarqa, Madaba, Al-Balqaa)	Non-smoker	Surgical	Specialist	Jordanian Ministry of Health	Full-Time	700-1400 JDs	<40	1-3 on-calls	No	No	No	Often	Often	Sometimes	Often	Often	Sometimes	Sometimes	Rarely	Rarely	Often	Neutral/undecided	Neutral/Undecided	Neutral/Undecided	Disagree	Agree
32	Male	Married	1-3 Persons	Rented Falt/House	Central (Amman, Zarqa, Madaba, Al-Balqaa)	Smoker	Surgical	Resident	Jordanian Ministry of Health	Full-Time	<700 JDs	>48	1-3 on-calls	No	No	No	Always	Very Often	Often	Always	Sometimes	Always	Often	Sometimes	Rarely	Very Often	Disagree	Strongly disagree	Agree	Disagree	Agree
29	Male	Married	1-3 Persons	Rented Falt/House	Central (Amman, Zarqa, Madaba, Al-Balqaa)	Non-smoker	Surgical	Resident	Jordanian Ministry of Health	Full-Time	<700 JDs	>48	1-3 on-calls	No	No	No	Always	Always	Often	Always	Very Often	Rarely	Sometimes	Never	Never	Rarely	Disagree	Neutral/Undecided	Neutral/Undecided	Agree	Disagree
27	Male	Single	4-6 Persons	Owned Falt/House	Central (Amman, Zarqa, Madaba, Al-Balqaa)	Non-smoker	Medical	General Practitioner	Non-Governmental Organizations	Part-Time	<700 JDs	<40	0	Yes	No	No	Often	Often	Often	Often	Often	Often	Often	Often	Often	Often	Neutral/undecided	Agree	Neutral/Undecided	Neutral/Undecided	Agree
39	Male	Married	4-6 Persons	Rented Falt/House	Central (Amman, Zarqa, Madaba, Al-Balqaa)	Smoker	Medical	Resident	Jordanian Ministry of Health	Full-Time	700-1400 JDs	40-48	0	No	No	No	Often	Often	Sometimes	Sometimes	Rarely	Sometimes	Rarely	Rarely	Often	Sometimes	Neutral/undecided	Neutral/Undecided	Agree	Neutral/Undecided	Agree
26	Male	Married	1-3 Persons	Owned Falt/House	Central (Amman, Zarqa, Madaba, Al-Balqaa)	Smoker	Medical	General Practitioner	Private Hospitals/Clinics	Part-Time	<700 JDs	>48	1-3 on-calls	Yes	No	No	Always	Sometimes	Sometimes	Rarely	Sometimes	Rarely	Rarely	Almost Never	Very Often	Almost Never	Neutral/undecided	Disagree	Disagree	Agree	Neutral/Undecided
30	Male	Married	1-3 Persons	Rented Falt/House	Central (Amman, Zarqa, Madaba, Al-Balqaa)	Non-smoker	Medical	Specialist	Jordanian Royal Medical Services	Full-Time	700-1400 JDs	>48	1-3 on-calls	No	No	No	Very Often	Sometimes	Often	Very Often	Very Often	Very Often	Sometimes	Sometimes	Often	Often	Agree	Neutral/Undecided	Agree	Disagree	Agree
24	Female	Single	4-6 Persons	Owned Falt/House	Central (Amman, Zarqa, Madaba, Al-Balqaa)	Non-smoker	Medical	General Practitioner	Private Hospitals/Clinics	Full-Time	<700 JDs	40-48	1-3 on-calls	Yes	No	No	Often	Sometimes	Almost Never	Sometimes	Almost Never	Almost Never	Sometimes	Never	Sometimes	Rarely	Agree	Agree	Disagree	Agree	Strongly disagree
29	Female	Married	1-3 Persons	Owned Falt/House	North (Irbid, Ajloun, Jerash, Mafraq)	Non-smoker	Medical	Resident	Jordanian Ministry of Health	Full-Time	700-1400 JDs	40-48	0	No	No	No	Very Often	Very Often	Rarely	Sometimes	Always	Rarely	Often	Almost Never	Sometimes	Often	Neutral/undecided	Strongly disagree	Agree	Neutral/Undecided	Agree
29	Male	Married	1-3 Persons	Rented Falt/House	Central (Amman, Zarqa, Madaba, Al-Balqaa)	Non-smoker	Surgical	Resident	Jordanian Ministry of Health	Full-Time	<700 JDs	>48	1-3 on-calls	No	No	No	Always	Always	Often	Always	Very Often	Rarely	Sometimes	Never	Never	Rarely	Disagree	Neutral/Undecided	Neutral/Undecided	Agree	Disagree
28	Male	Single	>6 Persons	Rented Falt/House	Central (Amman, Zarqa, Madaba, Al-Balqaa)	Smoker	Medical	General Practitioner	Private Hospitals/Clinics	Full-Time	<700 JDs	>48	0	No	Yes	No	Always	Sometimes	Often	Often	Often	Very Often	Always	Very Often	Always	Sometimes	Neutral/undecided	Neutral/Undecided	Agree	Agree	Strongly agree
32	Male	Married	1-3 Persons	Owned Falt/House	Central (Amman, Zarqa, Madaba, Al-Balqaa)	Smoker	Surgical	Resident	Jordanian Ministry of Health	Full-Time	<700 JDs	>48	>3	Yes	Yes	No	Often	Often	Sometimes	Sometimes	Rarely	Sometimes	Very Often	Rarely	Sometimes	Sometimes	Neutral/undecided	Neutral/Undecided	Neutral/Undecided	Agree	Neutral/Undecided
40	Male	Married	4-6 Persons	Rented Falt/House	North (Irbid, Ajloun, Jerash, Mafraq)	Non-smoker	Medical	Specialist	Jordanian Ministry of Health	Part-Time	700-1400 JDs	>48	0	Yes	No	No	Never	Almost Never	Never	Almost Never	Rarely	Rarely	Never	Rarely	Sometimes	Often	Neutral/undecided	Agree	Neutral/Undecided	Agree	Neutral/Undecided
32	Male	Married	4-6 Persons	Owned Falt/House	North (Irbid, Ajloun, Jerash, Mafraq)	Non-smoker	Surgical	Resident	Jordanian Ministry of Health	Full-Time	700-1400 JDs	>48	1-3 on-calls	No	No	No	Sometimes	Very Often	Often	Rarely	Sometimes	Often	Rarely	Rarely	Sometimes	Rarely	Agree	Agree	Agree	Agree	Disagree
32	Male	Single	1-3 Persons	Owned Falt/House	North (Irbid, Ajloun, Jerash, Mafraq)	Smoker	Medical	Resident	Jordanian Ministry of Health	Full-Time	<700 JDs	>48	1-3 on-calls	No	No	No	Often	Sometimes	Always	Always	Always	Always	Always	Always	Always	Always	Strongly disagree	Agree	Agree	Strongly disagree	Agree
31	Female	Married	1-3 Persons	Owned Falt/House	Central (Amman, Zarqa, Madaba, Al-Balqaa)	Non-smoker	Medical	Resident	Jordanian Ministry of Health	Full-Time	700-1400 JDs	40-48	0	No	No	No	Very Often	Sometimes	Very Often	Often	Sometimes	Sometimes	Often	Rarely	Rarely	Sometimes	Neutral/undecided	Agree	Agree	Neutral/Undecided	Neutral/Undecided
28	Male	Single	4-6 Persons	Owned Falt/House	South (Aqapa, Karak, Maan, Tafileh)	Non-smoker	Medical	General Practitioner	Private Hospitals/Clinics	Part-Time	<700 JDs	40-48	0	Yes	No	No	Sometimes	Sometimes	Sometimes	Sometimes	Sometimes	Often	Often	Sometimes	Sometimes	Sometimes	Neutral/undecided	Neutral/Undecided	Disagree	Agree	Disagree
28	Male	Single	4-6 Persons	Owned Falt/House	Central (Amman, Zarqa, Madaba, Al-Balqaa)	Non-smoker	Surgical	Resident	Jordanian Royal Medical Services	Full-Time	700-1400 JDs	40-48	1-3 on-calls	Yes	No	No	Rarely	Almost Never	Never	Sometimes	Sometimes	Sometimes	Almost Never	Almost Never	Sometimes	Sometimes	Strongly Agree	Neutral/Undecided	Disagree	Neutral/Undecided	Neutral/Undecided
57	Male	Married	4-6 Persons	Owned Falt/House	North (Irbid, Ajloun, Jerash, Mafraq)	Non-smoker	Surgical	Specialist	Jordanian Ministry of Health	Full-Time	700-1400 JDs	40-48	0	No	No	No	Always	Always	Sometimes	Sometimes	Sometimes	Sometimes	Sometimes	Sometimes	Sometimes	Often	Neutral/undecided	Agree	Agree	Neutral/Undecided	Neutral/Undecided
27	Male	Single	4-6 Persons	Owned Falt/House	Central (Amman, Zarqa, Madaba, Al-Balqaa)	Non-smoker	Surgical	Resident	Private Hospitals/Clinics	Full-Time	<700 JDs	>48	1-3 on-calls	Yes	No	No	Often	Often	Very Often	Often	Rarely	Always	Always	Always	Always	Always	Neutral/undecided	Strongly disagree	Neutral/Undecided	Neutral/Undecided	Disagree
65	Female	Single	1-3 Persons	Owned Falt/House	Central (Amman, Zarqa, Madaba, Al-Balqaa)	Non-smoker	Medical	General Practitioner	Private Hospitals/Clinics	Full-Time	700-1400 JDs	40-48	0	No	No	No	Rarely	Often	Sometimes	Sometimes	Sometimes	Sometimes	Rarely	Never	Rarely	Never	Agree	Agree	Disagree	Agree	Disagree
38	Male	Married	1-3 Persons	Owned Falt/House	Central (Amman, Zarqa, Madaba, Al-Balqaa)	Smoker	Surgical	Specialist	Jordanian Ministry of Health	Full-Time	700-1400 JDs	40-48	1-3 on-calls	No	Yes	No	Sometimes	Very Often	Sometimes	Often	Very Often	Sometimes	Sometimes	Rarely	Sometimes	Often	Neutral/undecided	Neutral/Undecided	Disagree	Disagree	Neutral/Undecided
32	Male	Married	1-3 Persons	Rented Falt/House	Central (Amman, Zarqa, Madaba, Al-Balqaa)	Smoker	Surgical	Resident	Jordanian Ministry of Health	Full-Time	<700 JDs	>48	>3	No	No	No	Always	Always	Always	Always	Sometimes	Always	Often	Never	Sometimes	Sometimes	Neutral/undecided	Neutral/Undecided	Strongly Agree	Neutral/Undecided	Agree
36	Male	Single	1-3 Persons	Owned Falt/House	Central (Amman, Zarqa, Madaba, Al-Balqaa)	Smoker	Surgical	Resident	Jordanian Ministry of Health	Full-Time	700-1400 JDs	>48	>3	No	No	No	Always	Always	Always	Always	Always	Always	Always	Always	Always	Always	Strongly disagree	Neutral/Undecided	Strongly Agree	Strongly disagree	Strongly agree
67	Male	Married	1-3 Persons	Owned Falt/House	Central (Amman, Zarqa, Madaba, Al-Balqaa)	Smoker	Medical	Consultant	Private Hospitals/Clinics	Full-Time	>1400 JDs	<40	0	Yes	No	No	Sometimes	Sometimes	Sometimes	Sometimes	Sometimes	Sometimes	Sometimes	Rarely	Sometimes	Rarely	Agree	Neutral/Undecided	Neutral/Undecided	Neutral/Undecided	Disagree
32	Male	Married	1-3 Persons	Rented Falt/House	Central (Amman, Zarqa, Madaba, Al-Balqaa)	Smoker	Medical	Resident	Jordanian Ministry of Health	Full-Time	700-1400 JDs	40-48	1-3 on-calls	No	No	No	Sometimes	Sometimes	Sometimes	Sometimes	Sometimes	Often	Often	Rarely	Sometimes	Often	Disagree	Disagree	Agree	Disagree	Agree
32	Female	Married	1-3 Persons	Rented Falt/House	Central (Amman, Zarqa, Madaba, Al-Balqaa)	Non-smoker	Medical	General Practitioner	Non-Governmental Organizations	Full-Time	700-1400 JDs	<40	0	Yes	No	No	Sometimes	Very Often	Often	Sometimes	Sometimes	Often	Often	Sometimes	Sometimes	Sometimes	Agree	Neutral/Undecided	Neutral/Undecided	Neutral/Undecided	Neutral/Undecided
26	Male	Married	4-6 Persons	Owned Falt/House	South (Aqapa, Karak, Maan, Tafileh)	Smoker	Medical	General Practitioner	Non-Governmental Organizations	Part-Time	<700 JDs	<40	0	Yes	No	No	Never	Rarely	Rarely	Rarely	Always	Sometimes	Sometimes	Rarely	Sometimes	Rarely	Neutral/undecided	Neutral/Undecided	Agree	Agree	Neutral/Undecided
28	Female	Single	>6 Persons	Rented Falt/House	Central (Amman, Zarqa, Madaba, Al-Balqaa)	Non-smoker	Medical	General Practitioner	Non-Governmental Organizations	Part-Time	<700 JDs	40-48	1-3 on-calls	No	No	No	Often	Often	Always	Often	Sometimes	Always	Very Often	Very Often	Often	Very Often	Disagree	Neutral/Undecided	Agree	Neutral/Undecided	Neutral/Undecided
25	Male	Single	4-6 Persons	Owned Falt/House	Central (Amman, Zarqa, Madaba, Al-Balqaa)	Smoker	Medical	General Practitioner	Non-Governmental Organizations	Part-Time	<700 JDs	<40	0	Yes	No	No	Always	Very Often	Sometimes	Sometimes	Sometimes	Sometimes	Often	Sometimes	Very Often	Often	Strongly disagree	Strongly disagree	Neutral/Undecided	Neutral/Undecided	Agree
27	Male	Married	>6 Persons	Owned Falt/House	South (Aqapa, Karak, Maan, Tafileh)	Non-smoker	Medical	Resident	Jordanian Ministry of Health	Full-Time	700-1400 JDs	>48	1-3 on-calls	No	No	Yes	Very Often	Often	Often	Sometimes	Sometimes	Very Often	Very Often	Rarely	Very Often	Often	Neutral/undecided	Neutral/Undecided	Agree	Neutral/Undecided	Disagree
28	Male	Single	4-6 Persons	Owned Falt/House	South (Aqapa, Karak, Maan, Tafileh)	Non-smoker	Medical	General Practitioner	Private Hospitals/Clinics	Part-Time	<700 JDs	40-48	0	Yes	No	No	Sometimes	Sometimes	Sometimes	Sometimes	Sometimes	Often	Often	Sometimes	Sometimes	Sometimes	Neutral/undecided	Neutral/Undecided	Disagree	Agree	Disagree
32	Male	Single	1-3 Persons	Rented Falt/House	Central (Amman, Zarqa, Madaba, Al-Balqaa)	Smoker	Surgical	Resident	Jordanian Ministry of Health	Full-Time	700-1400 JDs	>48	1-3 on-calls	Yes	No	Yes	Often	Rarely	Almost Never	Sometimes	Rarely	Rarely	Sometimes	Almost Never	Very Often	Sometimes	Agree	Strongly Agree	Disagree	Agree	Strongly disagree
31	Male	Married	1-3 Persons	Rented Falt/House	South (Aqapa, Karak, Maan, Tafileh)	Non-smoker	Medical	Resident	Jordanian Ministry of Health	Full-Time	700-1400 JDs	>48	1-3 on-calls	No	No	No	Often	Sometimes	Rarely	Sometimes	Rarely	Sometimes	Rarely	Rarely	Sometimes	Sometimes	Neutral/undecided	Neutral/Undecided	Neutral/Undecided	Agree	Neutral/Undecided
25	Female	Single	1-3 Persons	Owned Falt/House	Central (Amman, Zarqa, Madaba, Al-Balqaa)	Non-smoker	Medical	General Practitioner	Private Hospitals/Clinics	Part-Time	<700 JDs	40-48	0	Yes	Yes	No	Very Often	Rarely	Never	Never	Never	Never	Never	Never	Almost Never	Rarely	Neutral/undecided	Neutral/Undecided	Agree	Neutral/Undecided	Neutral/Undecided
32	Male	Married	1-3 Persons	Rented Falt/House	Central (Amman, Zarqa, Madaba, Al-Balqaa)	Smoker	Surgical	Resident	Jordanian Ministry of Health	Full-Time	<700 JDs	>48	>3	No	No	No	Always	Always	Always	Always	Sometimes	Always	Often	Never	Sometimes	Sometimes	Neutral/undecided	Neutral/Undecided	Strongly Agree	Neutral/Undecided	Agree
31	Male	Single	1-3 Persons	Owned Falt/House	Central (Amman, Zarqa, Madaba, Al-Balqaa)	Smoker	Surgical	Resident	Jordanian Ministry of Health	Full-Time	<700 JDs	>48	1-3 on-calls	No	No	No	Always	Often	Rarely	Always	Rarely	Very Often	Often	Never	Almost Never	Rarely	Neutral/undecided	Neutral/Undecided	Agree	Neutral/Undecided	Neutral/Undecided
29	Male	Married	1-3 Persons	Rented Falt/House	Central (Amman, Zarqa, Madaba, Al-Balqaa)	Smoker	Medical	Resident	Private Hospitals/Clinics	Full-Time	<700 JDs	>48	1-3 on-calls	No	No	Yes	Always	Always	Always	Always	Always	Always	Always	Always	Always	Always	Disagree	Neutral/Undecided	Strongly Agree	Agree	Strongly agree
33	Male	Single	4-6 Persons	Owned Falt/House	South (Aqapa, Karak, Maan, Tafileh)	Smoker	Surgical	Specialist	Jordanian Ministry of Health	Full-Time	<700 JDs	>48	1-3 on-calls	No	No	No	Always	Always	Always	Always	Always	Very Often	Often	Sometimes	Rarely	Often	Disagree	Disagree	Agree	Disagree	Agree
31	Male	Married	>6 Persons	Owned Falt/House	Central (Amman, Zarqa, Madaba, Al-Balqaa)	Smoker	Medical	Specialist	Jordanian Ministry of Health	Full-Time	>1400 JDs	>48	1-3 on-calls	Yes	No	No	Always	Always	Very Often	Very Often	Rarely	Always	Almost Never	Very Often	Often	Often	Disagree	Disagree	Neutral/Undecided	Disagree	Agree
31	Male	Married	1-3 Persons	Rented Falt/House	Central (Amman, Zarqa, Madaba, Al-Balqaa)	Non-smoker	Medical	Resident	Jordanian Royal Medical Services	Full-Time	700-1400 JDs	<40	1-3 on-calls	Yes	No	No	Almost Never	Sometimes	Almost Never	Sometimes	Sometimes	Rarely	Rarely	Often	Almost Never	Sometimes	Agree	Agree	Strongly disagree	Agree	Disagree
30	Male	Single	4-6 Persons	Owned Falt/House	Central (Amman, Zarqa, Madaba, Al-Balqaa)	Smoker	Medical	Resident	Jordanian Royal Medical Services	Part-Time	<700 JDs	40-48	1-3 on-calls	No	No	No	Sometimes	Sometimes	Always	Very Often	Never	Often	Sometimes	Never	Sometimes	Sometimes	Disagree	Neutral/Undecided	Neutral/Undecided	Disagree	Agree
28	Male	Single	1-3 Persons	Owned Falt/House	Central (Amman, Zarqa, Madaba, Al-Balqaa)	Smoker	Medical	Resident	Jordanian Royal Medical Services	Full-Time	<700 JDs	<40	1-3 on-calls	No	No	No	Often	Very Often	Very Often	Very Often	Sometimes	Often	Very Often	Sometimes	Sometimes	Often	Disagree	Disagree	Agree	Neutral/Undecided	Agree
30	Female	Married	1-3 Persons	Owned Falt/House	Central (Amman, Zarqa, Madaba, Al-Balqaa)	Smoker	Medical	Resident	Jordanian Royal Medical Services	Full-Time	700-1400 JDs	<40	0	Yes	No	No	Sometimes	Sometimes	Often	Very Often	Very Often	Always	Rarely	Sometimes	Rarely	Rarely	Neutral/undecided	Disagree	Disagree	Neutral/Undecided	Neutral/Undecided
30	Male	Single	>6 Persons	Owned Falt/House	North (Irbid, Ajloun, Jerash, Mafraq)	Non-smoker	Medical	Resident	Jordanian Royal Medical Services	Full-Time	700-1400 JDs	>48	1-3 on-calls	Yes	No	No	Often	Often	Rarely	Often	Rarely	Sometimes	Sometimes	Sometimes	Often	Often	Agree	Agree	Agree	Agree	Agree
33	Male	Married	1-3 Persons	Rented Falt/House	Central (Amman, Zarqa, Madaba, Al-Balqaa)	Smoker	Surgical	Resident	Jordanian Ministry of Health	Full-Time	<700 JDs	>48	>3	No	No	No	Always	Very Often	Very Often	Always	Sometimes	Always	Always	Sometimes	Very Often	Very Often	Strongly disagree	Neutral/Undecided	Strongly Agree	Disagree	Strongly agree
45	Male	Married	4-6 Persons	Rented Falt/House	Central (Amman, Zarqa, Madaba, Al-Balqaa)	Non-smoker	Medical	Specialist	Jordanian Ministry of Health	Full-Time	700-1400 JDs	40-48	1-3 on-calls	Yes	No	No	Always	Often	Sometimes	Very Often	Sometimes	Very Often	Sometimes	Rarely	Often	Often	Strongly Agree	Neutral/Undecided	Disagree	Agree	Strongly disagree
37	Male	Married	1-3 Persons	Rented Falt/House	Central (Amman, Zarqa, Madaba, Al-Balqaa)	Smoker	Medical	Resident	Jordanian Ministry of Health	Full-Time	700-1400 JDs	40-48	1-3 on-calls	No	No	Yes	Sometimes	Never	Never	Sometimes	Sometimes	Sometimes	Never	Never	Always	Sometimes	Neutral/undecided	Neutral/Undecided	Agree	Neutral/Undecided	Strongly agree
35	Male	Married	1-3 Persons	Rented Falt/House	Central (Amman, Zarqa, Madaba, Al-Balqaa)	Smoker	Medical	Specialist	Jordanian Ministry of Health	Full-Time	700-1400 JDs	<40	0	No	No	No	Often	Very Often	Often	Often	Often	Often	Often	Often	Often	Sometimes	Disagree	Disagree	Neutral/Undecided	Neutral/Undecided	Neutral/Undecided
32	Male	Married	1-3 Persons	Owned Falt/House	Central (Amman, Zarqa, Madaba, Al-Balqaa)	Non-smoker	Surgical	Resident	Jordanian Ministry of Health	Full-Time	700-1400 JDs	40-48	1-3 on-calls	Yes	Yes	No	Often	Very Often	Often	Sometimes	Sometimes	Often	Often	Never	Often	Sometimes	Disagree	Neutral/Undecided	Strongly Agree	Strongly disagree	Neutral/Undecided
59	Male	Married	4-6 Persons	Owned Falt/House	Central (Amman, Zarqa, Madaba, Al-Balqaa)	Non-smoker	Medical	Specialist	Jordanian Ministry of Health	Full-Time	700-1400 JDs	40-48	0	No	No	No	Often	Often	Rarely	Rarely	Almost Never	Never	Almost Never	Almost Never	Almost Never	Almost Never	Agree	Agree	Disagree	Agree	Disagree
38	Male	Single	4-6 Persons	Owned Falt/House	Central (Amman, Zarqa, Madaba, Al-Balqaa)	Non-smoker	Surgical	Specialist	Private Hospitals/Clinics	Part-Time	<700 JDs	>48	>3	No	No	No	Never	Sometimes	Never	Never	Never	Never	Never	Never	Never	Never	Strongly disagree	Strongly disagree	Strongly disagree	Strongly disagree	Strongly disagree
35	Female	Single	4-6 Persons	Owned Falt/House	Central (Amman, Zarqa, Madaba, Al-Balqaa)	Non-smoker	Surgical	Resident	Jordanian Ministry of Health	Full-Time	700-1400 JDs	>48	1-3 on-calls	No	No	Yes	Always	Very Often	Sometimes	Sometimes	Sometimes	Very Often	Often	Sometimes	Sometimes	Often	Neutral/undecided	Neutral/Undecided	Agree	Strongly agree	Neutral/Undecided
30	Male	Married	1-3 Persons	Rented Falt/House	Central (Amman, Zarqa, Madaba, Al-Balqaa)	Smoker	Medical	Resident	Jordanian Royal Medical Services	Full-Time	700-1400 JDs	>48	1-3 on-calls	No	No	Yes	Often	Very Often	Sometimes	Often	Sometimes	Sometimes	Sometimes	Sometimes	Often	Sometimes	Neutral/undecided	Disagree	Neutral/Undecided	Disagree	Neutral/Undecided
30	Male	Married	1-3 Persons	Rented Falt/House	Central (Amman, Zarqa, Madaba, Al-Balqaa)	Smoker	Medical	Resident	Jordanian Royal Medical Services	Full-Time	700-1400 JDs	>48	1-3 on-calls	No	No	Yes	Often	Very Often	Sometimes	Often	Sometimes	Sometimes	Sometimes	Sometimes	Often	Sometimes	Neutral/undecided	Disagree	Neutral/Undecided	Disagree	Neutral/Undecided
28	Female	Married	1-3 Persons	Rented Falt/House	Central (Amman, Zarqa, Madaba, Al-Balqaa)	Non-smoker	Medical	Resident	Jordanian Royal Medical Services	Full-Time	<700 JDs	>48	1-3 on-calls	Yes	No	No	Very Often	Always	Often	Always	Rarely	Always	Sometimes	Sometimes	Very Often	Very Often	Disagree	Disagree	Agree	Neutral/Undecided	Agree
40	Male	Married	4-6 Persons	Owned Falt/House	Central (Amman, Zarqa, Madaba, Al-Balqaa)	Non-smoker	Surgical	Specialist	Private Hospitals/Clinics	Full-Time	>1400 JDs	40-48	1-3 on-calls	Yes	No	No	Often	Very Often	Often	Sometimes	Sometimes	Sometimes	Often	Sometimes	Often	Sometimes	Neutral/undecided	Neutral/Undecided	Neutral/Undecided	Neutral/Undecided	Neutral/Undecided
60	Male	Married	4-6 Persons	Owned Falt/House	Central (Amman, Zarqa, Madaba, Al-Balqaa)	Non-smoker	Medical	Consultant	Jordanian Ministry of Health	Full-Time	>1400 JDs	<40	1-3 on-calls	Yes	No	No	Sometimes	Rarely	Often	Sometimes	Sometimes	Sometimes	Sometimes	Rarely	Rarely	Sometimes	Neutral/undecided	Neutral/Undecided	Neutral/Undecided	Neutral/Undecided	Neutral/Undecided
37	Male	Married	1-3 Persons	Rented Falt/House	Central (Amman, Zarqa, Madaba, Al-Balqaa)	Non-smoker	Surgical	Specialist	Private Hospitals/Clinics	Full-Time	700-1400 JDs	<40	1-3 on-calls	Yes	No	No	Sometimes	Sometimes	Sometimes	Sometimes	Sometimes	Sometimes	Sometimes	Never	Sometimes	Sometimes	Agree	Agree	Neutral/Undecided	Agree	Disagree
29	Male	Married	1-3 Persons	Owned Falt/House	North (Irbid, Ajloun, Jerash, Mafraq)	Smoker	Surgical	Resident	Jordanian Royal Medical Services	Full-Time	700-1400 JDs	40-48	1-3 on-calls	Yes	No	No	Sometimes	Rarely	Never	Rarely	Almost Never	Almost Never	Almost Never	Almost Never	Almost Never	Almost Never	Agree	Agree	Agree	Agree	Disagree
29	Male	Married	1-3 Persons	Owned Falt/House	North (Irbid, Ajloun, Jerash, Mafraq)	Smoker	Surgical	Resident	Jordanian Royal Medical Services	Full-Time	700-1400 JDs	40-48	1-3 on-calls	Yes	No	No	Sometimes	Rarely	Never	Rarely	Almost Never	Almost Never	Almost Never	Almost Never	Almost Never	Almost Never	Agree	Agree	Agree	Agree	Disagree
33	Male	Married	4-6 Persons	Owned Falt/House	Central (Amman, Zarqa, Madaba, Al-Balqaa)	Smoker	Surgical	Specialist	Jordanian Royal Medical Services	Full-Time	700-1400 JDs	40-48	1-3 on-calls	No	No	No	Sometimes	Sometimes	Sometimes	Sometimes	Sometimes	Sometimes	Sometimes	Sometimes	Sometimes	Rarely	Neutral/undecided	Neutral/Undecided	Disagree	Neutral/Undecided	Neutral/Undecided
27	Male	Single	4-6 Persons	Owned Falt/House	Central (Amman, Zarqa, Madaba, Al-Balqaa)	Smoker	Surgical	Resident	Jordanian Royal Medical Services	Full-Time	<700 JDs	>48	1-3 on-calls	No	No	Yes	Often	Always	Very Often	Always	Always	Very Often	Sometimes	Sometimes	Rarely	Often	Neutral/undecided	Agree	Disagree	Neutral/Undecided	Neutral/Undecided
28	Female	Single	1-3 Persons	Rented Falt/House	Central (Amman, Zarqa, Madaba, Al-Balqaa)	Non-smoker	Surgical	Resident	Jordanian Ministry of Health	Part-Time	<700 JDs	>48	1-3 on-calls	No	No	No	Often	Often	Often	Often	Often	Often	Often	Sometimes	Often	Sometimes	Disagree	Neutral/Undecided	Agree	Neutral/Undecided	Agree
26	Male	Single	1-3 Persons	Owned Falt/House	Central (Amman, Zarqa, Madaba, Al-Balqaa)	Smoker	Surgical	Resident	Jordanian Royal Medical Services	Full-Time	700-1400 JDs	>48	1-3 on-calls	No	No	Yes	Very Often	Sometimes	Rarely	Never	Sometimes	Often	Often	Never	Very Often	Very Often	Agree	Agree	Disagree	Strongly agree	Strongly disagree
30	Female	Married	4-6 Persons	Rented Falt/House	Central (Amman, Zarqa, Madaba, Al-Balqaa)	Smoker	Surgical	Resident	Jordanian Ministry of Health	Full-Time	<700 JDs	40-48	1-3 on-calls	No	No	No	Very Often	Often	Often	Often	Sometimes	Sometimes	Sometimes	Rarely	Never	Rarely	Neutral/undecided	Neutral/Undecided	Agree	Agree	Disagree
33	Male	Married	4-6 Persons	Owned Falt/House	Central (Amman, Zarqa, Madaba, Al-Balqaa)	Smoker	Surgical	Specialist	Jordanian Royal Medical Services	Full-Time	700-1400 JDs	40-48	1-3 on-calls	No	No	No	Sometimes	Sometimes	Sometimes	Sometimes	Sometimes	Sometimes	Sometimes	Sometimes	Sometimes	Rarely	Neutral/undecided	Neutral/Undecided	Disagree	Neutral/Undecided	Neutral/Undecided
30	Female	Single	1-3 Persons	Owned Falt/House	Central (Amman, Zarqa, Madaba, Al-Balqaa)	Smoker	Surgical	Resident	Jordanian Ministry of Health	Full-Time	<700 JDs	>48	>3	No	No	No	Always	Often	Sometimes	Often	Sometimes	Often	Very Often	Sometimes	Always	Sometimes	Neutral/undecided	Neutral/Undecided	Neutral/Undecided	Agree	Strongly disagree
27	Female	Single	1-3 Persons	Rented Falt/House	Central (Amman, Zarqa, Madaba, Al-Balqaa)	Non-smoker	Surgical	Resident	Jordanian Ministry of Health	Full-Time	<700 JDs	>48	1-3 on-calls	No	No	No	Always	Sometimes	Very Often	Very Often	Sometimes	Very Often	Very Often	Always	Always	Sometimes	Disagree	Neutral/Undecided	Neutral/Undecided	Agree	Neutral/Undecided
42	Male	Married	4-6 Persons	Rented Falt/House	Central (Amman, Zarqa, Madaba, Al-Balqaa)	Non-smoker	Medical	Resident	Jordanian Ministry of Health	Full-Time	700-1400 JDs	40-48	0	Yes	No	No	Sometimes	Always	Often	Rarely	Often	Rarely	Almost Never	Almost Never	Almost Never	Sometimes	Strongly Agree	Strongly Agree	Disagree	Agree	Strongly disagree
26	Female	Single	1-3 Persons	Rented Falt/House	Central (Amman, Zarqa, Madaba, Al-Balqaa)	Non-smoker	Surgical	Resident	Jordanian Ministry of Health	Full-Time	<700 JDs	40-48	1-3 on-calls	Yes	No	Yes	Always	Always	Very Often	Often	Rarely	Very Often	Sometimes	Almost Never	Often	Often	Disagree	Disagree	Strongly Agree	Neutral/Undecided	Neutral/Undecided
26	Male	Single	1-3 Persons	Owned Falt/House	Central (Amman, Zarqa, Madaba, Al-Balqaa)	Smoker	Surgical	Resident	Jordanian Royal Medical Services	Full-Time	700-1400 JDs	>48	1-3 on-calls	No	No	Yes	Very Often	Sometimes	Rarely	Never	Sometimes	Often	Often	Never	Very Often	Very Often	Agree	Agree	Disagree	Strongly agree	Strongly disagree
30	Male	Married	1-3 Persons	Owned Falt/House	Central (Amman, Zarqa, Madaba, Al-Balqaa)	Non-smoker	Medical	General Practitioner	Private Hospitals/Clinics	Full-Time	<700 JDs	<40	0	No	No	Yes	Sometimes	Sometimes	Often	Often	Rarely	Sometimes	Never	Never	Rarely	Never	Neutral/undecided	Agree	Disagree	Strongly agree	Strongly disagree
26	Male	Single	4-6 Persons	Owned Falt/House	Central (Amman, Zarqa, Madaba, Al-Balqaa)	Non-smoker	Surgical	Resident	Private Hospitals/Clinics	Full-Time	<700 JDs	>48	1-3 on-calls	No	No	Yes	Very Often	Very Often	Sometimes	Very Often	Often	Very Often	Very Often	Rarely	Sometimes	Very Often	Neutral/undecided	Neutral/Undecided	Neutral/Undecided	Neutral/Undecided	Neutral/Undecided
30	Male	Single	4-6 Persons	Owned Falt/House	Central (Amman, Zarqa, Madaba, Al-Balqaa)	Smoker	Medical	Resident	Jordanian Royal Medical Services	Part-Time	<700 JDs	40-48	1-3 on-calls	No	No	No	Sometimes	Sometimes	Always	Very Often	Never	Often	Sometimes	Never	Sometimes	Sometimes	Disagree	Neutral/Undecided	Neutral/Undecided	Disagree	Agree
31	Female	Married	1-3 Persons	Rented Falt/House	Central (Amman, Zarqa, Madaba, Al-Balqaa)	Non-smoker	Surgical	Resident	Jordanian Ministry of Health	Full-Time	700-1400 JDs	40-48	1-3 on-calls	No	No	No	Very Often	Sometimes	Sometimes	Sometimes	Sometimes	Often	Often	Rarely	Sometimes	Often	Neutral/undecided	Agree	Agree	Neutral/Undecided	Agree
27	Male	Single	1-3 Persons	Owned Falt/House	Central (Amman, Zarqa, Madaba, Al-Balqaa)	Non-smoker	Surgical	Resident	Jordanian Ministry of Health	Full-Time	<700 JDs	40-48	1-3 on-calls	No	No	Yes	Very Often	Very Often	Very Often	Very Often	Often	Very Often	Very Often	Rarely	Sometimes	Very Often	Neutral/undecided	Disagree	Agree	Neutral/Undecided	Neutral/Undecided
32	Male	Married	1-3 Persons	Rented Falt/House	Central (Amman, Zarqa, Madaba, Al-Balqaa)	Smoker	Surgical	Resident	Jordanian Ministry of Health	Full-Time	700-1400 JDs	>48	1-3 on-calls	Yes	No	Yes	Always	Always	Often	Often	Often	Sometimes	Sometimes	Often	Often	Often	Agree	Neutral/Undecided	Strongly Agree	Agree	Agree
33	Male	Single	4-6 Persons	Rented Falt/House	North (Irbid, Ajloun, Jerash, Mafraq)	Smoker	Medical	Resident	Jordanian Ministry of Health	Part-Time	700-1400 JDs	40-48	0	Yes	Yes	Yes	Very Often	Always	Often	Very Often	Sometimes	Often	Rarely	Never	Often	Sometimes	Disagree	Disagree	Disagree	Agree	Strongly agree
30	Male	Single	1-3 Persons	Owned Falt/House	Central (Amman, Zarqa, Madaba, Al-Balqaa)	Smoker	Surgical	Resident	Private Hospitals/Clinics	Part-Time	<700 JDs	<40	0	Yes	No	No	Often	Sometimes	Sometimes	Sometimes	Sometimes	Sometimes	Sometimes	Sometimes	Sometimes	Often	Neutral/undecided	Neutral/Undecided	Neutral/Undecided	Neutral/Undecided	Neutral/Undecided
31	Male	Married	4-6 Persons	Rented Falt/House	Central (Amman, Zarqa, Madaba, Al-Balqaa)	Non-smoker	Surgical	Resident	Jordanian Ministry of Health	Full-Time	700-1400 JDs	>48	>3	Yes	No	No	Very Often	Rarely	Rarely	Almost Never	Almost Never	Almost Never	Often	Never	Often	Very Often	Agree	Agree	Disagree	Agree	Disagree
32	Male	Single	>6 Persons	Owned Falt/House	North (Irbid, Ajloun, Jerash, Mafraq)	Non-smoker	Surgical	Specialist	Jordanian Royal Medical Services	Full-Time	700-1400 JDs	>48	1-3 on-calls	No	No	No	Often	Sometimes	Sometimes	Sometimes	Sometimes	Sometimes	Rarely	Rarely	Sometimes	Sometimes	Neutral/undecided	Neutral/Undecided	Neutral/Undecided	Neutral/Undecided	Neutral/Undecided
27	Female	Single	>6 Persons	Owned Falt/House	North (Irbid, Ajloun, Jerash, Mafraq)	Non-smoker	Medical	Resident	Jordanian Royal Medical Services	Full-Time	<700 JDs	<40	0	Yes	No	No	Sometimes	Sometimes	Sometimes	Sometimes	Almost Never	Rarely	Almost Never	Never	Sometimes	Sometimes	Neutral/undecided	Neutral/Undecided	Neutral/Undecided	Neutral/Undecided	Neutral/Undecided
31	Male	Married	1-3 Persons	Rented Falt/House	Central (Amman, Zarqa, Madaba, Al-Balqaa)	Smoker	Surgical	Resident	Jordanian Royal Medical Services	Full-Time	700-1400 JDs	40-48	1-3 on-calls	Yes	No	No	Often	Very Often	Very Often	Often	Rarely	Rarely	Sometimes	Rarely	Very Often	Sometimes	Disagree	Neutral/Undecided	Disagree	Strongly disagree	Agree
34	Male	Married	4-6 Persons	Rented Falt/House	Central (Amman, Zarqa, Madaba, Al-Balqaa)	Smoker	Surgical	Resident	Jordanian Ministry of Health	Full-Time	<700 JDs	40-48	1-3 on-calls	No	No	No	Very Often	Often	Sometimes	Sometimes	Never	Very Often	Often	Rarely	Very Often	Sometimes	Agree	Neutral/Undecided	Neutral/Undecided	Agree	Strongly disagree
31	Female	Married	4-6 Persons	Rented Falt/House	Central (Amman, Zarqa, Madaba, Al-Balqaa)	Non-smoker	Surgical	Resident	Jordanian Royal Medical Services	Part-Time	<700 JDs	40-48	1-3 on-calls	Yes	No	No	Rarely	Rarely	Sometimes	Often	Rarely	Sometimes	Almost Never	Very Often	Sometimes	Sometimes	Neutral/undecided	Disagree	Neutral/Undecided	Agree	Neutral/Undecided
31	Female	Single	4-6 Persons	Rented Falt/House	Central (Amman, Zarqa, Madaba, Al-Balqaa)	Non-smoker	Surgical	Resident	Jordanian Ministry of Health	Full-Time	<700 JDs	40-48	0	Yes	No	No	Very Often	Sometimes	Sometimes	Often	Often	Often	Sometimes	Sometimes	Often	Sometimes	Disagree	Neutral/Undecided	Agree	Neutral/Undecided	Agree
30	Male	Single	4-6 Persons	Owned Falt/House	Central (Amman, Zarqa, Madaba, Al-Balqaa)	Smoker	Surgical	Resident	Jordanian Royal Medical Services	Full-Time	<700 JDs	>48	1-3 on-calls	Yes	No	No	Very Often	Sometimes	Often	Sometimes	Sometimes	Sometimes	Sometimes	Rarely	Sometimes	Rarely	Agree	Neutral/Undecided	Neutral/Undecided	Disagree	Neutral/Undecided
26	Male	Single	4-6 Persons	Rented Falt/House	Central (Amman, Zarqa, Madaba, Al-Balqaa)	Smoker	Surgical	Resident	Non-Governmental Organizations	Part-Time	<700 JDs	40-48	1-3 on-calls	Yes	Yes	No	Sometimes	Rarely	Often	Sometimes	Very Often	Sometimes	Rarely	Almost Never	Almost Never	Rarely	Neutral/undecided	Disagree	Neutral/Undecided	Neutral/Undecided	Neutral/Undecided
41	Male	Married	>6 Persons	Owned Falt/House	Central (Amman, Zarqa, Madaba, Al-Balqaa)	Smoker	Medical	Resident	Jordanian Ministry of Health	Full-Time	700-1400 JDs	40-48	1-3 on-calls	No	No	Yes	Often	Often	Always	Often	Very Often	Often	Always	Often	Rarely	Very Often	Disagree	Neutral/Undecided	Strongly Agree	Strongly agree	Agree
28	Male	Married	4-6 Persons	Owned Falt/House	Central (Amman, Zarqa, Madaba, Al-Balqaa)	Non-smoker	Surgical	Resident	Jordanian Royal Medical Services	Full-Time	<700 JDs	40-48	1-3 on-calls	No	No	No	Often	Sometimes	Sometimes	Sometimes	Rarely	Sometimes	Sometimes	Rarely	Rarely	Sometimes	Neutral/undecided	Neutral/Undecided	Agree	Neutral/Undecided	Disagree
29	Female	Married	4-6 Persons	Owned Falt/House	Central (Amman, Zarqa, Madaba, Al-Balqaa)	Non-smoker	Medical	Specialist	Non-Governmental Organizations	Full-Time	<700 JDs	40-48	0	Yes	No	No	Sometimes	Sometimes	Sometimes	Sometimes	Sometimes	Sometimes	Sometimes	Sometimes	Sometimes	Sometimes	Neutral/undecided	Neutral/Undecided	Neutral/Undecided	Agree	Neutral/Undecided
28	Female	Married	1-3 Persons	Rented Falt/House	Central (Amman, Zarqa, Madaba, Al-Balqaa)	Non-smoker	Surgical	Resident	Jordanian Ministry of Health	Part-Time	<700 JDs	<40	0	No	No	Yes	Never	Often	Never	Almost Never	Almost Never	Never	Almost Never	Always	Never	Almost Never	Strongly disagree	Strongly disagree	Strongly disagree	Strongly agree	Agree
25	Female	Married	4-6 Persons	Rented Falt/House	Central (Amman, Zarqa, Madaba, Al-Balqaa)	Non-smoker	Medical	General Practitioner	Private Hospitals/Clinics	Full-Time	<700 JDs	<40	0	Yes	Yes	No	Sometimes	Almost Never	Often	Never	Rarely	Often	Sometimes	Rarely	Rarely	Sometimes	Neutral/undecided	Neutral/Undecided	Disagree	Neutral/Undecided	Agree
35	Male	Married	1-3 Persons	Owned Falt/House	Central (Amman, Zarqa, Madaba, Al-Balqaa)	Non-smoker	Medical	Specialist	Jordanian Ministry of Health	Full-Time	700-1400 JDs	40-48	0	Yes	No	No	Often	Often	Rarely	Often	Rarely	Sometimes	Sometimes	Sometimes	Sometimes	Sometimes	Disagree	Neutral/Undecided	Neutral/Undecided	Disagree	Agree
30	Male	Married	1-3 Persons	Rented Falt/House	Central (Amman, Zarqa, Madaba, Al-Balqaa)	Smoker	Surgical	Resident	Jordanian Ministry of Health	Full-Time	700-1400 JDs	>48	1-3 on-calls	Yes	Yes	No	Very Often	Sometimes	Rarely	Sometimes	Sometimes	Sometimes	Sometimes	Sometimes	Sometimes	Sometimes	Neutral/undecided	Neutral/Undecided	Neutral/Undecided	Neutral/Undecided	Neutral/Undecided
30	Male	Single	>6 Persons	Owned Falt/House	Central (Amman, Zarqa, Madaba, Al-Balqaa)	Smoker	Medical	General Practitioner	Jordanian Ministry of Health	Full-Time	<700 JDs	40-48	0	No	No	Yes	Very Often	Often	Rarely	Very Often	Almost Never	Very Often	Never	Almost Never	Rarely	Sometimes	Neutral/undecided	Disagree	Neutral/Undecided	Neutral/Undecided	Neutral/Undecided
33	Male	Married	>6 Persons	Owned Falt/House	Central (Amman, Zarqa, Madaba, Al-Balqaa)	Smoker	Surgical	Resident	Jordanian Ministry of Health	Full-Time	700-1400 JDs	>48	1-3 on-calls	No	No	No	Very Often	Always	Sometimes	Often	Sometimes	Often	Very Often	Rarely	Always	Often	Neutral/undecided	Disagree	Agree	Neutral/Undecided	Disagree
29	Male	Single	1-3 Persons	Owned Falt/House	North (Irbid, Ajloun, Jerash, Mafraq)	Non-smoker	Surgical	Resident	Jordanian Ministry of Health	Full-Time	<700 JDs	>48	1-3 on-calls	No	No	No	Very Often	Very Often	Sometimes	Sometimes	Almost Never	Almost Never	Almost Never	Almost Never	Very Often	Sometimes	Neutral/undecided	Neutral/Undecided	Neutral/Undecided	Neutral/Undecided	Neutral/Undecided
33	Male	Single	1-3 Persons	Rented Falt/House	Central (Amman, Zarqa, Madaba, Al-Balqaa)	Smoker	Medical	General Practitioner	Jordanian Ministry of Health	Full-Time	<700 JDs	>48	0	No	No	Yes	Always	Always	Sometimes	Sometimes	Sometimes	Sometimes	Sometimes	Sometimes	Often	Often	Agree	Neutral/Undecided	Neutral/Undecided	Neutral/Undecided	Neutral/Undecided
32	Male	Married	1-3 Persons	Rented Falt/House	Central (Amman, Zarqa, Madaba, Al-Balqaa)	Non-smoker	Medical	Specialist	Jordanian Ministry of Health	Full-Time	700-1400 JDs	<40	1-3 on-calls	Yes	Yes	No	Almost Never	Rarely	Rarely	Sometimes	Often	Often	Sometimes	Often	Sometimes	Sometimes	Agree	Neutral/Undecided	Neutral/Undecided	Agree	Neutral/Undecided
38	Female	Married	4-6 Persons	Owned Falt/House	Central (Amman, Zarqa, Madaba, Al-Balqaa)	Non-smoker	Medical	Resident	Jordanian Ministry of Health	Full-Time	700-1400 JDs	40-48	0	Yes	No	No	Often	Sometimes	Never	Sometimes	Never	Sometimes	Often	Never	Never	Almost Never	Agree	Disagree	Neutral/Undecided	Agree	Neutral/Undecided
31	Female	Single	1-3 Persons	Owned Falt/House	Central (Amman, Zarqa, Madaba, Al-Balqaa)	Non-smoker	Medical	Resident	Jordanian Ministry of Health	Full-Time	700-1400 JDs	<40	0	No	No	No	Often	Very Often	Very Often	Often	Often	Often	Sometimes	Rarely	Sometimes	Sometimes	Neutral/undecided	Neutral/Undecided	Disagree	Agree	Neutral/Undecided
29	Female	Married	1-3 Persons	Rented Falt/House	Central (Amman, Zarqa, Madaba, Al-Balqaa)	Non-smoker	Medical	Resident	Jordanian Royal Medical Services	Full-Time	700-1400 JDs	40-48	1-3 on-calls	No	No	No	Often	Often	Often	Sometimes	Sometimes	Very Often	Sometimes	Rarely	Sometimes	Very Often	Disagree	Disagree	Strongly Agree	Disagree	Agree
30	Male	Married	1-3 Persons	Rented Falt/House	South (Aqapa, Karak, Maan, Tafileh)	Smoker	Medical	Specialist	Jordanian Royal Medical Services	Part-Time	700-1400 JDs	<40	1-3 on-calls	Yes	No	No	Sometimes	Rarely	Rarely	Sometimes	Rarely	Sometimes	Rarely	Rarely	Rarely	Rarely	Neutral/undecided	Neutral/Undecided	Neutral/Undecided	Neutral/Undecided	Agree
30	Female	Single	1-3 Persons	Owned Falt/House	North (Irbid, Ajloun, Jerash, Mafraq)	Non-smoker	Surgical	Resident	Jordanian Royal Medical Services	Full-Time	700-1400 JDs	<40	1-3 on-calls	Yes	No	No	Sometimes	Rarely	Rarely	Sometimes	Rarely	Very Often	Very Often	Rarely	Often	Very Often	Disagree	Disagree	Agree	Disagree	Disagree
31	Female	Single	4-6 Persons	Owned Falt/House	Central (Amman, Zarqa, Madaba, Al-Balqaa)	Non-smoker	Medical	Specialist	Private Hospitals/Clinics	Full-Time	>1400 JDs	<40	0	Yes	Yes	No	Often	Very Often	Sometimes	Rarely	Rarely	Rarely	Sometimes	Never	Sometimes	Sometimes	Agree	Agree	Neutral/Undecided	Agree	Disagree
30	Female	Married	1-3 Persons	Owned Falt/House	Central (Amman, Zarqa, Madaba, Al-Balqaa)	Non-smoker	Surgical	Resident	Jordanian Ministry of Health	Part-Time	700-1400 JDs	<40	1-3 on-calls	No	No	Yes	Very Often	Very Often	Sometimes	Sometimes	Sometimes	Sometimes	Often	Rarely	Very Often	Very Often	Agree	Neutral/Undecided	Neutral/Undecided	Disagree	Disagree
32	Male	Married	1-3 Persons	Owned Falt/House	Central (Amman, Zarqa, Madaba, Al-Balqaa)	Non-smoker	Surgical	Specialist	Jordanian Royal Medical Services	Part-Time	700-1400 JDs	<40	1-3 on-calls	No	No	Yes	Sometimes	Very Often	Often	Often	Rarely	Often	Sometimes	Rarely	Sometimes	Sometimes	Neutral/undecided	Agree	Neutral/Undecided	Neutral/Undecided	Neutral/Undecided
31	Female	Married	4-6 Persons	Owned Falt/House	Central (Amman, Zarqa, Madaba, Al-Balqaa)	Non-smoker	Medical	Resident	Jordanian Royal Medical Services	Full-Time	700-1400 JDs	<40	0	No	No	No	Often	Very Often	Often	Sometimes	Rarely	Sometimes	Sometimes	Rarely	Rarely	Sometimes	Neutral/undecided	Neutral/Undecided	Agree	Neutral/Undecided	Agree
31	Female	Married	1-3 Persons	Owned Falt/House	Central (Amman, Zarqa, Madaba, Al-Balqaa)	Non-smoker	Surgical	Resident	Jordanian Ministry of Health	Full-Time	700-1400 JDs	<40	1-3 on-calls	No	No	Yes	Always	Always	Very Often	Very Often	Often	Very Often	Very Often	Very Often	Sometimes	Rarely	Agree	Neutral/Undecided	Agree	Neutral/Undecided	Disagree
30	Male	Married	4-6 Persons	Rented Falt/House	North (Irbid, Ajloun, Jerash, Mafraq)	Smoker	Medical	Resident	Jordanian Royal Medical Services	Full-Time	<700 JDs	40-48	1-3 on-calls	No	No	No	Often	Sometimes	Sometimes	Sometimes	Sometimes	Very Often	Often	Sometimes	Often	Often	Neutral/undecided	Neutral/Undecided	Agree	Disagree	Agree
32	Female	Married	1-3 Persons	Rented Falt/House	Central (Amman, Zarqa, Madaba, Al-Balqaa)	Non-smoker	Medical	Specialist	Jordanian Ministry of Health	Full-Time	700-1400 JDs	40-48	1-3 on-calls	Yes	No	No	Often	Often	Often	Almost Never	Rarely	Sometimes	Often	Almost Never	Sometimes	Sometimes	Agree	Neutral/Undecided	Neutral/Undecided	Neutral/Undecided	Agree
30	Female	Single	4-6 Persons	Owned Falt/House	North (Irbid, Ajloun, Jerash, Mafraq)	Smoker	Medical	Specialist	Jordanian Royal Medical Services	Full-Time	700-1400 JDs	40-48	1-3 on-calls	No	No	No	Very Often	Very Often	Very Often	Very Often	Very Often	Sometimes	Sometimes	Rarely	Rarely	Sometimes	Neutral/undecided	Neutral/Undecided	Neutral/Undecided	Neutral/Undecided	Neutral/Undecided
33	Male	Married	1-3 Persons	Owned Falt/House	Central (Amman, Zarqa, Madaba, Al-Balqaa)	Non-smoker	Medical	Resident	Jordanian Ministry of Health	Part-Time	<700 JDs	>48	1-3 on-calls	Yes	Yes	Yes	Never	Always	Sometimes	Sometimes	Sometimes	Always	Sometimes	Sometimes	Sometimes	Sometimes	Strongly disagree	Disagree	Disagree	Agree	Strongly disagree
33	Male	Married	1-3 Persons	Owned Falt/House	Central (Amman, Zarqa, Madaba, Al-Balqaa)	Non-smoker	Medical	Resident	Jordanian Ministry of Health	Part-Time	<700 JDs	>48	1-3 on-calls	Yes	Yes	Yes	Never	Always	Sometimes	Sometimes	Sometimes	Always	Sometimes	Sometimes	Sometimes	Sometimes	Strongly disagree	Disagree	Disagree	Agree	Strongly disagree
30	Female	Married	1-3 Persons	Rented Falt/House	North (Irbid, Ajloun, Jerash, Mafraq)	Non-smoker	Medical	General Practitioner	Non-Governmental Organizations	Full-Time	700-1400 JDs	<40	0	Yes	No	No	Often	Very Often	Rarely	Sometimes	Rarely	Rarely	Rarely	Almost Never	Rarely	Rarely	Agree	Agree	Disagree	Agree	Disagree
37	Male	Married	1-3 Persons	Rented Falt/House	Central (Amman, Zarqa, Madaba, Al-Balqaa)	Non-smoker	Surgical	Specialist	Private Hospitals/Clinics	Full-Time	700-1400 JDs	<40	1-3 on-calls	Yes	No	No	Sometimes	Sometimes	Sometimes	Sometimes	Sometimes	Sometimes	Sometimes	Never	Sometimes	Sometimes	Agree	Agree	Neutral/Undecided	Agree	Disagree
37	Male	Married	1-3 Persons	Rented Falt/House	Central (Amman, Zarqa, Madaba, Al-Balqaa)	Non-smoker	Surgical	Specialist	Private Hospitals/Clinics	Full-Time	700-1400 JDs	<40	1-3 on-calls	Yes	No	No	Sometimes	Sometimes	Sometimes	Sometimes	Sometimes	Sometimes	Sometimes	Never	Sometimes	Sometimes	Agree	Agree	Neutral/Undecided	Agree	Disagree
30	Female	Married	1-3 Persons	Rented Falt/House	Central (Amman, Zarqa, Madaba, Al-Balqaa)	Non-smoker	Surgical	Resident	Private Hospitals/Clinics	Full-Time	<700 JDs	40-48	1-3 on-calls	Yes	No	No	Very Often	Sometimes	Sometimes	Rarely	Almost Never	Sometimes	Sometimes	Rarely	Rarely	Sometimes	Disagree	Neutral/Undecided	Disagree	Agree	Neutral/Undecided
28	Female	Single	1-3 Persons	Owned Falt/House	Central (Amman, Zarqa, Madaba, Al-Balqaa)	Smoker	Medical	General Practitioner	Private Hospitals/Clinics	Part-Time	<700 JDs	<40	0	Yes	No	No	Rarely	Rarely	Rarely	Never	Almost Never	Sometimes	Sometimes	Almost Never	Rarely	Sometimes	Agree	Agree	Disagree	Agree	Disagree
31	Female	Single	4-6 Persons	Owned Falt/House	Central (Amman, Zarqa, Madaba, Al-Balqaa)	Non-smoker	Surgical	Resident	Jordanian Royal Medical Services	Full-Time	<700 JDs	>48	1-3 on-calls	No	No	No	Always	Very Often	Very Often	Very Often	Very Often	Very Often	Often	Sometimes	Always	Often	Neutral/undecided	Neutral/Undecided	Agree	Agree	Disagree
29	Female	Single	4-6 Persons	Owned Falt/House	Central (Amman, Zarqa, Madaba, Al-Balqaa)	Smoker	Medical	Resident	Jordanian Royal Medical Services	Full-Time	<700 JDs	>48	1-3 on-calls	Yes	No	No	Very Often	Sometimes	Sometimes	Sometimes	Rarely	Sometimes	Sometimes	Almost Never	Very Often	Rarely	Neutral/undecided	Agree	Disagree	Neutral/Undecided	Disagree
31	Female	Married	1-3 Persons	Owned Falt/House	Central (Amman, Zarqa, Madaba, Al-Balqaa)	Smoker	Medical	Specialist	Jordanian Ministry of Health	Full-Time	>1400 JDs	<40	1-3 on-calls	Yes	No	No	Often	Very Often	Sometimes	Sometimes	Often	Often	Often	Sometimes	Sometimes	Sometimes	Agree	Neutral/Undecided	Agree	Disagree	Strongly agree
29	Female	Married	1-3 Persons	Rented Falt/House	Central (Amman, Zarqa, Madaba, Al-Balqaa)	Smoker	Medical	Resident	Jordanian Ministry of Health	Part-Time	700-1400 JDs	<40	0	Yes	No	No	Sometimes	Sometimes	Sometimes	Sometimes	Sometimes	Sometimes	Sometimes	Sometimes	Rarely	Rarely	Neutral/undecided	Neutral/Undecided	Neutral/Undecided	Agree	Disagree
32	Female	Married	1-3 Persons	Owned Falt/House	Central (Amman, Zarqa, Madaba, Al-Balqaa)	Non-smoker	Medical	Resident	Jordanian Ministry of Health	Full-Time	700-1400 JDs	<40	0	Yes	No	No	Very Often	Very Often	Very Often	Often	Often	Always	Very Often	Sometimes	Sometimes	Very Often	Neutral/undecided	Agree	Agree	Neutral/Undecided	Agree
31	Female	Married	4-6 Persons	Owned Falt/House	Central (Amman, Zarqa, Madaba, Al-Balqaa)	Non-smoker	Medical	Resident	Jordanian Ministry of Health	Full-Time	<700 JDs	40-48	0	Yes	No	No	Sometimes	Sometimes	Rarely	Rarely	Almost Never	Rarely	Rarely	Almost Never	Rarely	Rarely	Agree	Neutral/Undecided	Disagree	Neutral/Undecided	Strongly disagree
33	Female	Married	1-3 Persons	Owned Falt/House	Central (Amman, Zarqa, Madaba, Al-Balqaa)	Non-smoker	Medical	Specialist	Jordanian Ministry of Health	Full-Time	700-1400 JDs	<40	0	No	No	No	Often	Very Often	Rarely	Sometimes	Almost Never	Rarely	Rarely	Almost Never	Rarely	Sometimes	Agree	Neutral/Undecided	Neutral/Undecided	Agree	Disagree
41	Female	Married	4-6 Persons	Owned Falt/House	Central (Amman, Zarqa, Madaba, Al-Balqaa)	Non-smoker	Medical	Resident	Jordanian Ministry of Health	Full-Time	700-1400 JDs	40-48	0	No	No	No	Often	Often	Often	Often	Sometimes	Always	Rarely	Sometimes	Always	Often	Neutral/undecided	Neutral/Undecided	Neutral/Undecided	Neutral/Undecided	Neutral/Undecided
32	Female	Single	4-6 Persons	Owned Falt/House	Central (Amman, Zarqa, Madaba, Al-Balqaa)	Non-smoker	Medical	Specialist	Jordanian Ministry of Health	Full-Time	700-1400 JDs	40-48	0	No	No	Yes	Sometimes	Sometimes	Sometimes	Sometimes	Sometimes	Rarely	Rarely	Rarely	Sometimes	Sometimes	Agree	Agree	Agree	Strongly agree	Disagree
28	Female	Married	1-3 Persons	Rented Falt/House	Central (Amman, Zarqa, Madaba, Al-Balqaa)	Non-smoker	Medical	Resident	Jordanian Ministry of Health	Part-Time	<700 JDs	40-48	0	No	No	No	Often	Very Often	Very Often	Often	Rarely	Very Often	Very Often	Rarely	Sometimes	Sometimes	Agree	Neutral/Undecided	Neutral/Undecided	Neutral/Undecided	Disagree
32	Female	Married	1-3 Persons	Owned Falt/House	Central (Amman, Zarqa, Madaba, Al-Balqaa)	Non-smoker	Medical	Resident	Jordanian Ministry of Health	Part-Time	<700 JDs	40-48	0	Yes	No	Yes	Sometimes	Sometimes	Sometimes	Sometimes	Often	Sometimes	Often	Sometimes	Rarely	Rarely	Agree	Neutral/Undecided	Disagree	Neutral/Undecided	Disagree
30	Male	Single	1-3 Persons	Owned Falt/House	Central (Amman, Zarqa, Madaba, Al-Balqaa)	Smoker	Surgical	Specialist	Private Hospitals/Clinics	Full-Time	700-1400 JDs	>48	1-3 on-calls	No	No	No	Very Often	Always	Sometimes	Often	Very Often	Always	Very Often	Rarely	Often	Often	Neutral/undecided	Neutral/Undecided	Agree	Neutral/Undecided	Neutral/Undecided
30	Female	Married	1-3 Persons	Rented Falt/House	North (Irbid, Ajloun, Jerash, Mafraq)	Non-smoker	Medical	Resident	Jordanian Ministry of Health	Full-Time	700-1400 JDs	40-48	1-3 on-calls	Yes	No	No	Very Often	Rarely	Sometimes	Often	Sometimes	Very Often	Very Often	Sometimes	Often	Very Often	Disagree	Disagree	Agree	Disagree	Agree
30	Female	Married	1-3 Persons	Rented Falt/House	Central (Amman, Zarqa, Madaba, Al-Balqaa)	Non-smoker	Medical	Resident	Jordanian Ministry of Health	Full-Time	700-1400 JDs	<40	0	No	No	No	Sometimes	Rarely	Almost Never	Rarely	Rarely	Sometimes	Very Often	Almost Never	Sometimes	Often	Agree	Agree	Agree	Agree	Agree
29	Female	Married	4-6 Persons	Owned Falt/House	Central (Amman, Zarqa, Madaba, Al-Balqaa)	Non-smoker	Medical	Specialist	Non-Governmental Organizations	Full-Time	700-1400 JDs	40-48	0	Yes	No	No	Sometimes	Rarely	Rarely	Rarely	Sometimes	Rarely	Rarely	Almost Never	Almost Never	Sometimes	Agree	Agree	Neutral/Undecided	Agree	Disagree
28	Female	Single	1-3 Persons	Owned Falt/House	North (Irbid, Ajloun, Jerash, Mafraq)	Non-smoker	Surgical	Resident	Jordanian Royal Medical Services	Full-Time	700-1400 JDs	40-48	1-3 on-calls	Yes	No	No	Sometimes	Almost Never	Almost Never	Never	Almost Never	Rarely	Often	Never	Rarely	Sometimes	Agree	Agree	Neutral/Undecided	Agree	Disagree
30	Female	Single	>6 Persons	Owned Falt/House	North (Irbid, Ajloun, Jerash, Mafraq)	Non-smoker	Surgical	Specialist	University Hospitals	Part-Time	<700 JDs	<40	1-3 on-calls	Yes	No	No	Always	Often	Often	Often	Often	Sometimes	Often	Sometimes	Often	Sometimes	Neutral/undecided	Neutral/Undecided	Neutral/Undecided	Neutral/Undecided	Neutral/Undecided
30	Male	Single	4-6 Persons	Owned Falt/House	Central (Amman, Zarqa, Madaba, Al-Balqaa)	Smoker	Medical	Resident	Jordanian Royal Medical Services	Full-Time	700-1400 JDs	>48	1-3 on-calls	Yes	No	No	Often	Very Often	Often	Often	Sometimes	Rarely	Sometimes	Almost Never	Almost Never	Sometimes	Neutral/undecided	Neutral/Undecided	Neutral/Undecided	Neutral/Undecided	Disagree
32	Male	Married	1-3 Persons	Rented Falt/House	Central (Amman, Zarqa, Madaba, Al-Balqaa)	Non-smoker	Surgical	Specialist	Private Hospitals/Clinics	Full-Time	700-1400 JDs	<40	0	No	No	No	Sometimes	Sometimes	Rarely	Rarely	Rarely	Sometimes	Often	Rarely	Rarely	Sometimes	Neutral/undecided	Neutral/Undecided	Disagree	Neutral/Undecided	Disagree
27	Female	Married	1-3 Persons	Rented Falt/House	Central (Amman, Zarqa, Madaba, Al-Balqaa)	Non-smoker	Medical	Resident	Private Hospitals/Clinics	Full-Time	<700 JDs	40-48	1-3 on-calls	No	No	No	Always	Always	Very Often	Always	Very Often	Very Often	Always	Always	Very Often	Very Often	Strongly Agree	Strongly disagree	Strongly Agree	Strongly disagree	Strongly agree
27	Female	Single	1-3 Persons	Owned Falt/House	Central (Amman, Zarqa, Madaba, Al-Balqaa)	Non-smoker	Medical	Resident	Private Hospitals/Clinics	Full-Time	<700 JDs	>48	>3	Yes	No	No	Often	Sometimes	Rarely	Often	Almost Never	Sometimes	Sometimes	Rarely	Very Often	Sometimes	Neutral/undecided	Neutral/Undecided	Neutral/Undecided	Neutral/Undecided	Neutral/Undecided
28	Female	Married	1-3 Persons	Rented Falt/House	Central (Amman, Zarqa, Madaba, Al-Balqaa)	Non-smoker	Medical	Resident	University Hospitals	Full-Time	<700 JDs	>48	1-3 on-calls	Yes	No	Yes	Always	Very Often	Often	Sometimes	Sometimes	Often	Sometimes	Sometimes	Almost Never	Sometimes	Disagree	Neutral/Undecided	Neutral/Undecided	Neutral/Undecided	Agree
32	Male	Married	1-3 Persons	Owned Falt/House	Central (Amman, Zarqa, Madaba, Al-Balqaa)	Non-smoker	Surgical	Specialist	Private Hospitals/Clinics	Part-Time	700-1400 JDs	<40	1-3 on-calls	Yes	No	No	Sometimes	Sometimes	Sometimes	Sometimes	Sometimes	Rarely	Sometimes	Rarely	Sometimes	Sometimes	Neutral/undecided	Neutral/Undecided	Neutral/Undecided	Neutral/Undecided	Disagree
32	Male	Married	1-3 Persons	Rented Falt/House	Central (Amman, Zarqa, Madaba, Al-Balqaa)	Non-smoker	Surgical	Specialist	Jordanian Ministry of Health	Full-Time	700-1400 JDs	40-48	1-3 on-calls	No	No	No	Very Often	Very Often	Sometimes	Sometimes	Sometimes	Often	Often	Sometimes	Very Often	Sometimes	Disagree	Agree	Agree	Neutral/Undecided	Disagree
31	Male	Single	1-3 Persons	Rented Falt/House	Central (Amman, Zarqa, Madaba, Al-Balqaa)	Non-smoker	Surgical	Resident	Private Hospitals/Clinics	Full-Time	<700 JDs	>48	>3	Yes	No	No	Very Often	Often	Very Often	Always	Always	Often	Often	Very Often	Almost Never	Often	Strongly disagree	Neutral/Undecided	Agree	Agree	Neutral/Undecided
35	Male	Married	4-6 Persons	Owned Falt/House	Central (Amman, Zarqa, Madaba, Al-Balqaa)	Smoker	Medical	Consultant	University Hospitals	Full-Time	>1400 JDs	40-48	0	Yes	No	No	Almost Never	Rarely	Rarely	Rarely	Never	Often	Sometimes	Rarely	Never	Never	Neutral/undecided	Neutral/Undecided	Neutral/Undecided	Neutral/Undecided	Neutral/Undecided
31	Female	Married	4-6 Persons	Rented Falt/House	Central (Amman, Zarqa, Madaba, Al-Balqaa)	Non-smoker	Medical	Resident	Private Hospitals/Clinics	Full-Time	<700 JDs	>48	1-3 on-calls	No	No	No	Always	Always	Always	Always	Always	Always	Always	Always	Always	Always	Strongly disagree	Strongly disagree	Strongly Agree	Strongly disagree	Strongly agree
29	Female	Married	1-3 Persons	Rented Falt/House	Central (Amman, Zarqa, Madaba, Al-Balqaa)	Non-smoker	Surgical	Resident	Jordanian Royal Medical Services	Full-Time	700-1400 JDs	40-48	>3	Yes	No	No	Always	Very Often	Always	Often	Sometimes	Often	Never	Never	Very Often	Often	Strongly Agree	Neutral/Undecided	Agree	Strongly agree	Strongly disagree
30	Male	Single	1-3 Persons	Owned Falt/House	Central (Amman, Zarqa, Madaba, Al-Balqaa)	Smoker	Medical	Resident	Private Hospitals/Clinics	Full-Time	<700 JDs	>48	1-3 on-calls	Yes	No	No	Sometimes	Sometimes	Sometimes	Sometimes	Sometimes	Sometimes	Sometimes	Sometimes	Sometimes	Sometimes	Neutral/undecided	Neutral/Undecided	Agree	Neutral/Undecided	Neutral/Undecided
32	Male	Married	1-3 Persons	Owned Falt/House	Central (Amman, Zarqa, Madaba, Al-Balqaa)	Non-smoker	Surgical	Specialist	Private Hospitals/Clinics	Part-Time	<700 JDs	<40	0	No	No	No	Always	Always	Always	Always	Always	Always	Always	Very Often	Very Often	Very Often	Neutral/undecided	Disagree	Neutral/Undecided	Neutral/Undecided	Agree
28	Female	Married	1-3 Persons	Owned Falt/House	Central (Amman, Zarqa, Madaba, Al-Balqaa)	Non-smoker	Medical	Resident	Jordanian Ministry of Health	Full-Time	<700 JDs	40-48	1-3 on-calls	No	No	No	Often	Always	Sometimes	Sometimes	Sometimes	Very Often	Very Often	Sometimes	Rarely	Sometimes	Neutral/undecided	Disagree	Neutral/Undecided	Neutral/Undecided	Agree
31	Female	Married	1-3 Persons	Rented Falt/House	Central (Amman, Zarqa, Madaba, Al-Balqaa)	Smoker	Medical	Resident	Jordanian Royal Medical Services	Full-Time	700-1400 JDs	>48	>3	Yes	No	No	Sometimes	Often	Often	Always	Sometimes	Always	Sometimes	Sometimes	Often	Always	Neutral/undecided	Neutral/Undecided	Neutral/Undecided	Disagree	Agree
32	Male	Single	1-3 Persons	Owned Falt/House	Central (Amman, Zarqa, Madaba, Al-Balqaa)	Non-smoker	Surgical	Specialist	Private Hospitals/Clinics	Full-Time	700-1400 JDs	40-48	0	Yes	No	No	Often	Often	Often	Sometimes	Sometimes	Sometimes	Rarely	Sometimes	Almost Never	Rarely	Neutral/undecided	Neutral/Undecided	Disagree	Neutral/Undecided	Disagree
37	Male	Married	4-6 Persons	Owned Falt/House	Central (Amman, Zarqa, Madaba, Al-Balqaa)	Non-smoker	Medical	Specialist	Private Hospitals/Clinics	Part-Time	700-1400 JDs	<40	1-3 on-calls	Yes	Yes	No	Never	Never	Sometimes	Sometimes	Sometimes	Sometimes	Sometimes	Sometimes	Sometimes	Sometimes	Neutral/undecided	Neutral/Undecided	Neutral/Undecided	Neutral/Undecided	Neutral/Undecided
26	Male	Single	>6 Persons	Owned Falt/House	Central (Amman, Zarqa, Madaba, Al-Balqaa)	Smoker	Surgical	Resident	Private Hospitals/Clinics	Full-Time	<700 JDs	>48	>3	No	No	No	Often	Sometimes	Rarely	Almost Never	Almost Never	Almost Never	Sometimes	Almost Never	Often	Rarely	Neutral/undecided	Neutral/Undecided	Disagree	Agree	Disagree
30	Female	Married	1-3 Persons	Rented Falt/House	Central (Amman, Zarqa, Madaba, Al-Balqaa)	Non-smoker	Surgical	Specialist	Private Hospitals/Clinics	Full-Time	700-1400 JDs	40-48	0	No	No	No	Often	Sometimes	Sometimes	Often	Sometimes	Sometimes	Often	Sometimes	Sometimes	Often	Agree	Agree	Disagree	Agree	Strongly disagree
47	Male	Married	4-6 Persons	Owned Falt/House	Central (Amman, Zarqa, Madaba, Al-Balqaa)	Smoker	Medical	Specialist	Non-Governmental Organizations	Full-Time	>1400 JDs	40-48	0	Yes	Yes	No	Rarely	Sometimes	Rarely	Rarely	Never	Sometimes	Rarely	Rarely	Almost Never	Almost Never	Neutral/undecided	Neutral/Undecided	Agree	Neutral/Undecided	Disagree
34	Male	Single	1-3 Persons	Rented Falt/House	Central (Amman, Zarqa, Madaba, Al-Balqaa)	Non-smoker	Surgical	Specialist	Private Hospitals/Clinics	Part-Time	700-1400 JDs	<40	0	No	No	Yes	Often	Very Often	Very Often	Always	Always	Often	Sometimes	Rarely	Sometimes	Sometimes	Strongly disagree	Agree	Disagree	Strongly agree	Disagree
30	Male	Single	1-3 Persons	Owned Falt/House	Central (Amman, Zarqa, Madaba, Al-Balqaa)	Non-smoker	Surgical	Specialist	Private Hospitals/Clinics	Part-Time	<700 JDs	<40	0	No	No	No	Sometimes	Sometimes	Rarely	Rarely	Rarely	Rarely	Sometimes	Sometimes	Sometimes	Rarely	Neutral/undecided	Neutral/Undecided	Disagree	Agree	Disagree
53	Male	Married	>6 Persons	Owned Falt/House	Central (Amman, Zarqa, Madaba, Al-Balqaa)	Smoker	Medical	Consultant	Jordanian Ministry of Health	Full-Time	>1400 JDs	<40	1-3 on-calls	No	No	No	Often	Sometimes	Sometimes	Sometimes	Rarely	Sometimes	Sometimes	Rarely	Rarely	Rarely	Agree	Neutral/Undecided	Neutral/Undecided	Agree	Disagree
32	Male	Married	1-3 Persons	Rented Falt/House	Central (Amman, Zarqa, Madaba, Al-Balqaa)	Non-smoker	Surgical	Resident	University Hospitals	Full-Time	<700 JDs	>48	>3	Yes	No	No	Sometimes	Often	Often	Often	Often	Sometimes	Sometimes	Sometimes	Rarely	Rarely	Neutral/undecided	Disagree	Agree	Disagree	Agree
25	Male	Single	1-3 Persons	Owned Falt/House	Central (Amman, Zarqa, Madaba, Al-Balqaa)	Non-smoker	Surgical	Resident	University Hospitals	Full-Time	<700 JDs	>48	1-3 on-calls	No	No	Yes	Sometimes	Often	Often	Sometimes	Almost Never	Rarely	Rarely	Almost Never	Almost Never	Rarely	Agree	Neutral/Undecided	Disagree	Neutral/Undecided	Disagree
32	Male	Single	4-6 Persons	Owned Falt/House	Central (Amman, Zarqa, Madaba, Al-Balqaa)	Non-smoker	Medical	Specialist	Jordanian Ministry of Health	Part-Time	700-1400 JDs	<40	0	Yes	No	No	Sometimes	Rarely	Almost Never	Rarely	Almost Never	Rarely	Sometimes	Sometimes	Sometimes	Sometimes	Neutral/undecided	Agree	Neutral/Undecided	Agree	Strongly disagree
27	Male	Single	1-3 Persons	Owned Falt/House	North (Irbid, Ajloun, Jerash, Mafraq)	Smoker	Surgical	Resident	University Hospitals	Full-Time	<700 JDs	>48	1-3 on-calls	No	No	No	Often	Always	Sometimes	Sometimes	Rarely	Often	Sometimes	Rarely	Often	Sometimes	Neutral/undecided	Agree	Agree	Agree	Disagree
49	Male	Married	4-6 Persons	Rented Falt/House	South (Aqapa, Karak, Maan, Tafileh)	Non-smoker	Medical	Specialist	Private Hospitals/Clinics	Full-Time	>1400 JDs	40-48	0	Yes	No	No	Sometimes	Often	Sometimes	Often	Sometimes	Sometimes	Sometimes	Rarely	Rarely	Rarely	Disagree	Agree	Disagree	Strongly agree	Strongly disagree
25	Male	Single	4-6 Persons	Owned Falt/House	North (Irbid, Ajloun, Jerash, Mafraq)	Smoker	Surgical	Resident	University Hospitals	Full-Time	<700 JDs	>48	1-3 on-calls	No	No	No	Always	Very Often	Sometimes	Always	Sometimes	Sometimes	Rarely	Sometimes	Almost Never	Sometimes	Disagree	Neutral/Undecided	Disagree	Neutral/Undecided	Disagree
28	Female	Single	>6 Persons	Rented Falt/House	Central (Amman, Zarqa, Madaba, Al-Balqaa)	Non-smoker	Medical	Resident	University Hospitals	Full-Time	<700 JDs	40-48	0	Yes	No	No	Sometimes	Often	Sometimes	Rarely	Rarely	Rarely	Rarely	Rarely	Rarely	Rarely	Strongly Agree	Strongly Agree	Disagree	Strongly agree	Strongly disagree
33	Male	Married	1-3 Persons	Owned Falt/House	Central (Amman, Zarqa, Madaba, Al-Balqaa)	Non-smoker	Medical	Specialist	Non-Governmental Organizations	Full-Time	700-1400 JDs	>48	0	Yes	No	No	Often	Often	Often	Often	Sometimes	Sometimes	Sometimes	Rarely	Often	Sometimes	Neutral/undecided	Neutral/Undecided	Disagree	Neutral/Undecided	Neutral/Undecided
34	Male	Married	1-3 Persons	Rented Falt/House	Central (Amman, Zarqa, Madaba, Al-Balqaa)	Smoker	Medical	Resident	Private Hospitals/Clinics	Full-Time	700-1400 JDs	40-48	0	Yes	No	No	Rarely	Sometimes	Rarely	Rarely	Almost Never	Rarely	Almost Never	Never	Rarely	Sometimes	Agree	Agree	Neutral/Undecided	Agree	Disagree
24	Female	Single	1-3 Persons	Owned Falt/House	North (Irbid, Ajloun, Jerash, Mafraq)	Non-smoker	Surgical	Resident	University Hospitals	Full-Time	<700 JDs	>48	1-3 on-calls	No	No	No	Sometimes	Sometimes	Sometimes	Sometimes	Sometimes	Rarely	Rarely	Almost Never	Rarely	Rarely	Neutral/undecided	Neutral/Undecided	Disagree	Agree	Disagree
25	Female	Single	1-3 Persons	Rented Falt/House	North (Irbid, Ajloun, Jerash, Mafraq)	Non-smoker	Surgical	Resident	University Hospitals	Full-Time	<700 JDs	40-48	1-3 on-calls	Yes	No	No	Often	Often	Very Often	Very Often	Very Often	Sometimes	Often	Almost Never	Sometimes	Sometimes	Disagree	Agree	Agree	Agree	Disagree
29	Male	Married	1-3 Persons	Owned Falt/House	Central (Amman, Zarqa, Madaba, Al-Balqaa)	Non-smoker	Surgical	Resident	Jordanian Royal Medical Services	Full-Time	700-1400 JDs	>48	1-3 on-calls	No	No	Yes	Always	Often	Sometimes	Sometimes	Rarely	Sometimes	Sometimes	Rarely	Rarely	Rarely	Agree	Agree	Disagree	Agree	Agree
31	Male	Married	1-3 Persons	Rented Falt/House	North (Irbid, Ajloun, Jerash, Mafraq)	Non-smoker	Surgical	Resident	University Hospitals	Full-Time	<700 JDs	>48	1-3 on-calls	Yes	No	No	Very Often	Always	Always	Very Often	Always	Very Often	Often	Often	Very Often	Very Often	Neutral/undecided	Neutral/Undecided	Neutral/Undecided	Neutral/Undecided	Strongly agree
25	Female	Single	4-6 Persons	Owned Falt/House	North (Irbid, Ajloun, Jerash, Mafraq)	Non-smoker	Surgical	Resident	University Hospitals	Full-Time	<700 JDs	>48	1-3 on-calls	No	No	No	Very Often	Very Often	Often	Sometimes	Sometimes	Often	Sometimes	Rarely	Almost Never	Often	Neutral/undecided	Neutral/Undecided	Agree	Neutral/Undecided	Neutral/Undecided
29	Female	Single	4-6 Persons	Owned Falt/House	Central (Amman, Zarqa, Madaba, Al-Balqaa)	Non-smoker	Medical	Resident	University Hospitals	Full-Time	<700 JDs	>48	1-3 on-calls	No	No	No	Very Often	Sometimes	Rarely	Rarely	Sometimes	Sometimes	Sometimes	Rarely	Rarely	Sometimes	Agree	Neutral/Undecided	Neutral/Undecided	Agree	Disagree
26	Male	Single	1-3 Persons	Owned Falt/House	Central (Amman, Zarqa, Madaba, Al-Balqaa)	Smoker	Surgical	Resident	University Hospitals	Full-Time	<700 JDs	>48	1-3 on-calls	No	No	No	Often	Often	Often	Very Often	Rarely	Sometimes	Sometimes	Almost Never	Very Often	Sometimes	Neutral/undecided	Agree	Strongly Agree	Agree	Strongly disagree
36	Male	Married	4-6 Persons	Owned Falt/House	Central (Amman, Zarqa, Madaba, Al-Balqaa)	Non-smoker	Surgical	Specialist	Jordanian Royal Medical Services	Full-Time	700-1400 JDs	>48	0	Yes	No	Yes	Very Often	Sometimes	Very Often	Always	Very Often	Sometimes	Sometimes	Rarely	Rarely	Sometimes	Disagree	Neutral/Undecided	Agree	Disagree	Agree
31	Male	Married	4-6 Persons	Rented Falt/House	North (Irbid, Ajloun, Jerash, Mafraq)	Smoker	Surgical	Resident	University Hospitals	Full-Time	700-1400 JDs	>48	1-3 on-calls	Yes	No	No	Sometimes	Always	Always	Never	Never	Never	Never	Never	Often	Rarely	Agree	Agree	Disagree	Agree	Strongly disagree
29	Female	Married	1-3 Persons	Owned Falt/House	Central (Amman, Zarqa, Madaba, Al-Balqaa)	Non-smoker	Medical	Resident	Jordanian Royal Medical Services	Full-Time	700-1400 JDs	>48	1-3 on-calls	No	No	No	Very Often	Sometimes	Sometimes	Sometimes	Never	Sometimes	Sometimes	Never	Often	Sometimes	Agree	Neutral/Undecided	Agree	Agree	Disagree
28	Male	Single	1-3 Persons	Rented Falt/House	North (Irbid, Ajloun, Jerash, Mafraq)	Non-smoker	Surgical	Resident	University Hospitals	Full-Time	<700 JDs	>48	1-3 on-calls	Yes	No	No	Often	Sometimes	Rarely	Sometimes	Rarely	Sometimes	Rarely	Never	Sometimes	Almost Never	Agree	Agree	Disagree	Neutral/Undecided	Strongly disagree
25	Female	Single	4-6 Persons	Owned Falt/House	North (Irbid, Ajloun, Jerash, Mafraq)	Non-smoker	Surgical	Resident	University Hospitals	Full-Time	<700 JDs	>48	1-3 on-calls	No	No	No	Often	Very Often	Always	Very Often	Very Often	Very Often	Sometimes	Sometimes	Very Often	Sometimes	Neutral/undecided	Neutral/Undecided	Agree	Neutral/Undecided	Neutral/Undecided
39	Male	Married	4-6 Persons	Rented Falt/House	Central (Amman, Zarqa, Madaba, Al-Balqaa)	Non-smoker	Surgical	Specialist	Jordanian Ministry of Health	Full-Time	>1400 JDs	>48	>3	No	No	No	Always	Always	Always	Always	Always	Always	Always	Always	Always	Always	Neutral/undecided	Neutral/Undecided	Strongly disagree	Strongly disagree	Strongly disagree
31	Female	Single	1-3 Persons	Owned Falt/House	Central (Amman, Zarqa, Madaba, Al-Balqaa)	Non-smoker	Medical	Specialist	Private Hospitals/Clinics	Full-Time	700-1400 JDs	40-48	1-3 on-calls	Yes	No	No	Often	Rarely	Almost Never	Rarely	Never	Rarely	Almost Never	Almost Never	Sometimes	Sometimes	Neutral/undecided	Neutral/Undecided	Disagree	Neutral/Undecided	Disagree
25	Male	Single	4-6 Persons	Owned Falt/House	Central (Amman, Zarqa, Madaba, Al-Balqaa)	Non-smoker	Surgical	Resident	Private Hospitals/Clinics	Full-Time	<700 JDs	40-48	1-3 on-calls	Yes	No	No	Often	Sometimes	Sometimes	Sometimes	Rarely	Sometimes	Sometimes	Rarely	Sometimes	Sometimes	Disagree	Agree	Neutral/Undecided	Neutral/Undecided	Agree
29	Male	Single	4-6 Persons	Owned Falt/House	Central (Amman, Zarqa, Madaba, Al-Balqaa)	Non-smoker	Surgical	Resident	Jordanian Royal Medical Services	Full-Time	<700 JDs	40-48	>3	Yes	No	No	Often	Often	Sometimes	Often	Often	Often	Often	Often	Often	Often	Agree	Agree	Agree	Agree	Agree
28	Female	Married	1-3 Persons	Rented Falt/House	Central (Amman, Zarqa, Madaba, Al-Balqaa)	Non-smoker	Medical	Resident	Jordanian Royal Medical Services	Full-Time	700-1400 JDs	40-48	1-3 on-calls	No	No	No	Often	Very Often	Rarely	Sometimes	Sometimes	Rarely	Sometimes	Rarely	Almost Never	Rarely	Neutral/undecided	Neutral/Undecided	Neutral/Undecided	Neutral/Undecided	Disagree
52	Male	Married	4-6 Persons	Owned Falt/House	Central (Amman, Zarqa, Madaba, Al-Balqaa)	Non-smoker	Surgical	Consultant	Private Hospitals/Clinics	Full-Time	>1400 JDs	<40	0	Yes	No	No	Sometimes	Rarely	Never	Never	Never	Never	Never	Never	Never	Never	Strongly Agree	Strongly Agree	Strongly disagree	Strongly agree	Strongly disagree
33	Male	Married	1-3 Persons	Owned Falt/House	Central (Amman, Zarqa, Madaba, Al-Balqaa)	Non-smoker	Medical	Specialist	Jordanian Ministry of Health	Full-Time	700-1400 JDs	40-48	1-3 on-calls	No	No	No	Often	Often	Sometimes	Often	Often	Very Often	Often	Rarely	Almost Never	Sometimes	Agree	Strongly Agree	Neutral/Undecided	Agree	Neutral/Undecided
40	Male	Married	4-6 Persons	Owned Falt/House	Central (Amman, Zarqa, Madaba, Al-Balqaa)	Smoker	Surgical	Consultant	Private Hospitals/Clinics	Full-Time	>1400 JDs	>48	>3	No	No	No	Sometimes	Never	Never	Rarely	Never	Never	Rarely	Never	Often	Almost Never	Agree	Agree	Strongly disagree	Strongly agree	Strongly disagree
52	Male	Married	>6 Persons	Owned Falt/House	Central (Amman, Zarqa, Madaba, Al-Balqaa)	Non-smoker	Medical	Specialist	Private Hospitals/Clinics	Full-Time	>1400 JDs	>48	1-3 on-calls	Yes	No	No	Very Often	Often	Sometimes	Very Often	Never	Rarely	Rarely	Almost Never	Rarely	Almost Never	Neutral/undecided	Agree	Strongly disagree	Neutral/Undecided	Strongly disagree
39	Male	Single	1-3 Persons	Rented Falt/House	Central (Amman, Zarqa, Madaba, Al-Balqaa)	Non-smoker	Surgical	Consultant	Jordanian Ministry of Health	Full-Time	>1400 JDs	<40	0	Yes	No	No	Often	Sometimes	Sometimes	Sometimes	Rarely	Sometimes	Often	Almost Never	Rarely	Sometimes	Agree	Agree	Strongly Agree	Neutral/Undecided	Neutral/Undecided
29	Male	Married	1-3 Persons	Rented Falt/House	Central (Amman, Zarqa, Madaba, Al-Balqaa)	Non-smoker	Surgical	Resident	Jordanian Ministry of Health	Full-Time	700-1400 JDs	<40	1-3 on-calls	No	No	No	Very Often	Very Often	Sometimes	Sometimes	Often	Often	Sometimes	Almost Never	Often	Rarely	Disagree	Strongly disagree	Agree	Strongly disagree	Strongly agree
35	Male	Single	1-3 Persons	Owned Falt/House	Central (Amman, Zarqa, Madaba, Al-Balqaa)	Non-smoker	Surgical	Resident	Private Hospitals/Clinics	Full-Time	700-1400 JDs	>48	1-3 on-calls	Yes	No	No	Very Often	Often	Rarely	Sometimes	Rarely	Sometimes	Sometimes	Never	Almost Never	Never	Disagree	Disagree	Disagree	Disagree	Neutral/Undecided
25	Female	Single	4-6 Persons	Owned Falt/House	Central (Amman, Zarqa, Madaba, Al-Balqaa)	Smoker	Medical	General Practitioner	Private Hospitals/Clinics	Part-Time	<700 JDs	40-48	1-3 on-calls	No	No	No	Always	Often	Sometimes	Very Often	Very Often	Often	Always	Sometimes	Always	Often	Neutral/undecided	Neutral/Undecided	Neutral/Undecided	Neutral/Undecided	Neutral/Undecided
31	Male	Married	4-6 Persons	Owned Falt/House	Central (Amman, Zarqa, Madaba, Al-Balqaa)	Non-smoker	Medical	General Practitioner	Jordanian Ministry of Health	Full-Time	700-1400 JDs	40-48	0	Yes	No	No	Very Often	Very Often	Always	Always	Very Often	Always	Always	Often	Sometimes	Very Often	Strongly disagree	Strongly disagree	Strongly Agree	Strongly disagree	Strongly agree
35	Male	Married	1-3 Persons	Rented Falt/House	Central (Amman, Zarqa, Madaba, Al-Balqaa)	Non-smoker	Medical	Consultant	Non-Governmental Organizations	Full-Time	>1400 JDs	40-48	0	Yes	No	No	Sometimes	Sometimes	Almost Never	Almost Never	Rarely	Almost Never	Almost Never	Never	Never	Almost Never	Agree	Agree	Disagree	Agree	Strongly disagree
33	Female	Single	1-3 Persons	Owned Falt/House	Central (Amman, Zarqa, Madaba, Al-Balqaa)	Non-smoker	Surgical	Resident	University Hospitals	Full-Time	<700 JDs	>48	0	Yes	No	No	Sometimes	Sometimes	Sometimes	Sometimes	Sometimes	Sometimes	Sometimes	Sometimes	Sometimes	Often	Neutral/undecided	Agree	Agree	Neutral/Undecided	Neutral/Undecided
34	Male	Single	4-6 Persons	Rented Falt/House	Central (Amman, Zarqa, Madaba, Al-Balqaa)	Smoker	Surgical	Specialist	Private Hospitals/Clinics	Full-Time	<700 JDs	40-48	0	Yes	No	No	Sometimes	Often	Sometimes	Sometimes	Never	Sometimes	Sometimes	Never	Rarely	Rarely	Neutral/undecided	Neutral/Undecided	Disagree	Neutral/Undecided	Neutral/Undecided
28	Female	Married	1-3 Persons	Rented Falt/House	Central (Amman, Zarqa, Madaba, Al-Balqaa)	Non-smoker	Medical	General Practitioner	Jordanian Ministry of Health	Full-Time	<700 JDs	40-48	0	Yes	No	No	Sometimes	Always	Very Often	Very Often	Very Often	Very Often	Sometimes	Rarely	Rarely	Rarely	Disagree	Disagree	Disagree	Neutral/Undecided	Agree
28	Female	Married	4-6 Persons	Owned Falt/House	Central (Amman, Zarqa, Madaba, Al-Balqaa)	Non-smoker	Medical	Resident	University Hospitals	Full-Time	<700 JDs	>48	1-3 on-calls	Yes	No	No	Often	Sometimes	Rarely	Sometimes	Rarely	Sometimes	Sometimes	Almost Never	Sometimes	Sometimes	Neutral/undecided	Disagree	Neutral/Undecided	Neutral/Undecided	Disagree
28	Male	Married	1-3 Persons	Rented Falt/House	Central (Amman, Zarqa, Madaba, Al-Balqaa)	Non-smoker	Medical	Resident	University Hospitals	Full-Time	<700 JDs	>48	1-3 on-calls	No	No	No	Always	Very Often	Very Often	Very Often	Often	Very Often	Very Often	Often	Very Often	Very Often	Disagree	Disagree	Agree	Strongly disagree	Strongly agree
44	Female	Married	1-3 Persons	Owned Falt/House	Central (Amman, Zarqa, Madaba, Al-Balqaa)	Non-smoker	Surgical	Consultant	Private Hospitals/Clinics	Full-Time	700-1400 JDs	<40	0	Yes	No	No	Never	Sometimes	Rarely	Almost Never	Almost Never	Rarely	Almost Never	Rarely	Rarely	Rarely	Strongly Agree	Strongly Agree	Strongly disagree	Strongly agree	Strongly disagree
28	Female	Married	1-3 Persons	Rented Falt/House	Central (Amman, Zarqa, Madaba, Al-Balqaa)	Non-smoker	Medical	General Practitioner	Non-Governmental Organizations	Full-Time	700-1400 JDs	40-48	0	Yes	No	No	Sometimes	Often	Sometimes	Often	Often	Often	Sometimes	Sometimes	Sometimes	Very Often	Disagree	Disagree	Agree	Strongly disagree	Neutral/Undecided
27	Male	Single	1-3 Persons	Owned Falt/House	Central (Amman, Zarqa, Madaba, Al-Balqaa)	Smoker	Medical	Resident	University Hospitals	Full-Time	700-1400 JDs	>48	>3	No	No	No	Sometimes	Very Often	Often	Sometimes	Sometimes	Very Often	Sometimes	Often	Sometimes	Sometimes	Neutral/undecided	Agree	Disagree	Strongly agree	Strongly disagree
29	Female	Single	1-3 Persons	Rented Falt/House	Central (Amman, Zarqa, Madaba, Al-Balqaa)	Non-smoker	Medical	Resident	Jordanian Royal Medical Services	Full-Time	<700 JDs	>48	>3	Yes	No	No	Always	Often	Sometimes	Sometimes	Rarely	Often	Sometimes	Sometimes	Always	Often	Neutral/undecided	Agree	Agree	Disagree	Agree
29	Female	Single	4-6 Persons	Owned Falt/House	Central (Amman, Zarqa, Madaba, Al-Balqaa)	Non-smoker	Medical	Resident	University Hospitals	Full-Time	<700 JDs	40-48	1-3 on-calls	Yes	No	No	Always	Often	Sometimes	Often	Always	Sometimes	Sometimes	Almost Never	Sometimes	Almost Never	Agree	Disagree	Agree	Disagree	Disagree
26	Male	Single	4-6 Persons	Owned Falt/House	North (Irbid, Ajloun, Jerash, Mafraq)	Non-smoker	Surgical	Resident	Jordanian Ministry of Health	Full-Time	<700 JDs	>48	1-3 on-calls	Yes	No	No	Very Often	Very Often	Often	Very Often	Very Often	Very Often	Very Often	Sometimes	Very Often	Very Often	Strongly disagree	Strongly disagree	Agree	Disagree	Strongly agree
25	Female	Single	4-6 Persons	Owned Falt/House	Central (Amman, Zarqa, Madaba, Al-Balqaa)	Non-smoker	Medical	Resident	University Hospitals	Full-Time	700-1400 JDs	40-48	1-3 on-calls	Yes	No	No	Often	Often	Rarely	Sometimes	Sometimes	Sometimes	Sometimes	Rarely	Very Often	Sometimes	Agree	Neutral/Undecided	Agree	Agree	Disagree
27	Female	Married	1-3 Persons	Owned Falt/House	Central (Amman, Zarqa, Madaba, Al-Balqaa)	Non-smoker	Medical	Resident	University Hospitals	Full-Time	<700 JDs	40-48	>3	Yes	No	No	Very Often	Always	Sometimes	Often	Sometimes	Often	Rarely	Rarely	Never	Sometimes	Disagree	Disagree	Agree	Agree	Disagree
26	Female	Single	1-3 Persons	Owned Falt/House	Central (Amman, Zarqa, Madaba, Al-Balqaa)	Non-smoker	Medical	Resident	University Hospitals	Full-Time	700-1400 JDs	>48	1-3 on-calls	No	No	No	Very Often	Sometimes	Rarely	Rarely	Rarely	Almost Never	Sometimes	Almost Never	Sometimes	Sometimes	Neutral/undecided	Neutral/Undecided	Neutral/Undecided	Disagree	Disagree
30	Male	Married	1-3 Persons	Rented Falt/House	Central (Amman, Zarqa, Madaba, Al-Balqaa)	Non-smoker	Medical	General Practitioner	Private Hospitals/Clinics	Full-Time	700-1400 JDs	<40	1-3 on-calls	No	No	Yes	Often	Often	Rarely	Sometimes	Sometimes	Very Often	Very Often	Sometimes	Very Often	Sometimes	Neutral/undecided	Neutral/Undecided	Neutral/Undecided	Disagree	Neutral/Undecided
27	Female	Single	1-3 Persons	Rented Falt/House	Central (Amman, Zarqa, Madaba, Al-Balqaa)	Smoker	Medical	Resident	University Hospitals	Full-Time	<700 JDs	>48	1-3 on-calls	Yes	No	No	Often	Often	Often	Often	Sometimes	Often	Often	Often	Often	Sometimes	Neutral/undecided	Neutral/Undecided	Neutral/Undecided	Neutral/Undecided	Neutral/Undecided
32	Male	Single	1-3 Persons	Owned Falt/House	Central (Amman, Zarqa, Madaba, Al-Balqaa)	Non-smoker	Medical	Resident	University Hospitals	Full-Time	<700 JDs	>48	1-3 on-calls	Yes	No	No	Rarely	Rarely	Never	Sometimes	Never	Almost Never	Almost Never	Almost Never	Sometimes	Almost Never	Agree	Agree	Disagree	Agree	Strongly disagree
27	Male	Single	>6 Persons	Owned Falt/House	North (Irbid, Ajloun, Jerash, Mafraq)	Smoker	Surgical	Resident	University Hospitals	Full-Time	<700 JDs	>48	1-3 on-calls	Yes	No	No	Always	Never	Never	Never	Never	Never	Often	Almost Never	Never	Never	Strongly Agree	Agree	Strongly disagree	Strongly agree	Strongly disagree
27	Female	Single	>6 Persons	Owned Falt/House	Central (Amman, Zarqa, Madaba, Al-Balqaa)	Non-smoker	Medical	Resident	University Hospitals	Full-Time	<700 JDs	>48	1-3 on-calls	Yes	No	No	Rarely	Often	Almost Never	Sometimes	Almost Never	Never	Rarely	Never	Almost Never	Sometimes	Agree	Strongly Agree	Disagree	Agree	Strongly disagree
32	Male	Married	1-3 Persons	Owned Falt/House	Central (Amman, Zarqa, Madaba, Al-Balqaa)	Non-smoker	Medical	Specialist	Private Hospitals/Clinics	Full-Time	700-1400 JDs	>48	1-3 on-calls	Yes	No	No	Often	Sometimes	Rarely	Rarely	Almost Never	Never	Rarely	Never	Rarely	Rarely	Neutral/undecided	Neutral/Undecided	Disagree	Agree	Disagree
29	Male	Single	>6 Persons	Owned Falt/House	Central (Amman, Zarqa, Madaba, Al-Balqaa)	Non-smoker	Medical	General Practitioner	Private Hospitals/Clinics	Part-Time	<700 JDs	40-48	1-3 on-calls	Yes	No	No	Often	Sometimes	Sometimes	Often	Rarely	Sometimes	Sometimes	Rarely	Often	Sometimes	Agree	Agree	Disagree	Neutral/Undecided	Agree
29	Female	Married	1-3 Persons	Owned Falt/House	Central (Amman, Zarqa, Madaba, Al-Balqaa)	Non-smoker	Medical	Resident	Jordanian Royal Medical Services	Full-Time	700-1400 JDs	>48	>3	No	No	No	Always	Always	Very Often	Always	Always	Always	Always	Very Often	Very Often	Always	Strongly disagree	Disagree	Agree	Disagree	Agree
33	Male	Married	4-6 Persons	Owned Falt/House	Central (Amman, Zarqa, Madaba, Al-Balqaa)	Non-smoker	Medical	Specialist	Private Hospitals/Clinics	Full-Time	700-1400 JDs	40-48	1-3 on-calls	Yes	No	No	Often	Often	Rarely	Rarely	Sometimes	Rarely	Sometimes	Rarely	Rarely	Rarely	Agree	Neutral/Undecided	Disagree	Neutral/Undecided	Disagree
28	Male	Single	4-6 Persons	Owned Falt/House	Central (Amman, Zarqa, Madaba, Al-Balqaa)	Non-smoker	Medical	Resident	University Hospitals	Full-Time	<700 JDs	>48	1-3 on-calls	No	No	No	Always	Always	Very Often	Always	Very Often	Very Often	Often	Always	Always	Very Often	Disagree	Strongly disagree	Strongly Agree	Neutral/Undecided	Neutral/Undecided
28	Male	Single	>6 Persons	Owned Falt/House	Central (Amman, Zarqa, Madaba, Al-Balqaa)	Smoker	Medical	Resident	University Hospitals	Full-Time	<700 JDs	>48	1-3 on-calls	Yes	No	No	Very Often	Very Often	Sometimes	Sometimes	Never	Sometimes	Very Often	Rarely	Often	Very Often	Neutral/undecided	Neutral/Undecided	Disagree	Neutral/Undecided	Disagree
28	Female	Married	4-6 Persons	Owned Falt/House	Central (Amman, Zarqa, Madaba, Al-Balqaa)	Non-smoker	Medical	General Practitioner	Non-Governmental Organizations	Part-Time	<700 JDs	<40	0	Yes	No	No	Sometimes	Always	Sometimes	Often	Rarely	Sometimes	Sometimes	Sometimes	Often	Rarely	Disagree	Disagree	Agree	Disagree	Agree
59	Male	Married	1-3 Persons	Owned Falt/House	Central (Amman, Zarqa, Madaba, Al-Balqaa)	Smoker	Medical	Consultant	Jordanian Ministry of Health	Full-Time	>1400 JDs	40-48	1-3 on-calls	Yes	No	No	Rarely	Rarely	Often	Never	Rarely	Never	Sometimes	Often	Never	Never	Strongly disagree	Neutral/Undecided	Neutral/Undecided	Agree	Disagree
32	Male	Married	1-3 Persons	Owned Falt/House	Central (Amman, Zarqa, Madaba, Al-Balqaa)	Smoker	Medical	Specialist	Private Hospitals/Clinics	Full-Time	700-1400 JDs	40-48	1-3 on-calls	Yes	No	No	Very Often	Sometimes	Rarely	Sometimes	Rarely	Sometimes	Sometimes	Almost Never	Often	Sometimes	Agree	Agree	Neutral/Undecided	Neutral/Undecided	Disagree
61	Male	Married	4-6 Persons	Owned Falt/House	Central (Amman, Zarqa, Madaba, Al-Balqaa)	Non-smoker	Medical	Consultant	Jordanian Ministry of Health	Full-Time	>1400 JDs	40-48	0	Yes	No	No	Sometimes	Rarely	Sometimes	Sometimes	Almost Never	Rarely	Rarely	Rarely	Sometimes	Rarely	Agree	Neutral/Undecided	Neutral/Undecided	Agree	Disagree
28	Male	Single	1-3 Persons	Owned Falt/House	Central (Amman, Zarqa, Madaba, Al-Balqaa)	Non-smoker	Medical	Resident	University Hospitals	Full-Time	700-1400 JDs	40-48	1-3 on-calls	No	No	Yes	Often	Often	Often	Rarely	Sometimes	Rarely	Sometimes	Rarely	Very Often	Rarely	Agree	Strongly Agree	Neutral/Undecided	Strongly agree	Disagree
44	Male	Married	>6 Persons	Owned Falt/House	North (Irbid, Ajloun, Jerash, Mafraq)	Smoker	Medical	Specialist	Jordanian Ministry of Health	Full-Time	700-1400 JDs	>48	1-3 on-calls	Yes	No	Yes	Very Often	Very Often	Never	Sometimes	Never	Always	Sometimes	Never	Often	Sometimes	Agree	Neutral/Undecided	Agree	Disagree	Disagree
36	Male	Married	4-6 Persons	Owned Falt/House	Central (Amman, Zarqa, Madaba, Al-Balqaa)	Non-smoker	Medical	Resident	Jordanian Ministry of Health	Full-Time	<700 JDs	40-48	0	Yes	No	Yes	Sometimes	Rarely	Never	Never	Sometimes	Rarely	Rarely	Rarely	Rarely	Rarely	Disagree	Neutral/Undecided	Agree	Agree	Agree
50	Male	Married	4-6 Persons	Owned Falt/House	Central (Amman, Zarqa, Madaba, Al-Balqaa)	Smoker	Surgical	Resident	Jordanian Ministry of Health	Full-Time	700-1400 JDs	40-48	1-3 on-calls	Yes	No	No	Sometimes	Often	Sometimes	Sometimes	Rarely	Sometimes	Sometimes	Sometimes	Rarely	Rarely	Disagree	Neutral/Undecided	Neutral/Undecided	Strongly disagree	Strongly agree
26	Male	Single	4-6 Persons	Owned Falt/House	Central (Amman, Zarqa, Madaba, Al-Balqaa)	Smoker	Medical	Resident	University Hospitals	Full-Time	<700 JDs	>48	1-3 on-calls	Yes	No	No	Often	Sometimes	Almost Never	Rarely	Almost Never	Often	Sometimes	Sometimes	Very Often	Almost Never	Neutral/undecided	Neutral/Undecided	Disagree	Neutral/Undecided	Disagree
33	Male	Married	1-3 Persons	Rented Falt/House	Central (Amman, Zarqa, Madaba, Al-Balqaa)	Non-smoker	Medical	Specialist	Private Hospitals/Clinics	Full-Time	>1400 JDs	>48	0	Yes	No	No	Sometimes	Rarely	Almost Never	Almost Never	Almost Never	Rarely	Rarely	Almost Never	Almost Never	Rarely	Agree	Neutral/Undecided	Disagree	Agree	Disagree
43	Male	Married	4-6 Persons	Owned Falt/House	Central (Amman, Zarqa, Madaba, Al-Balqaa)	Non-smoker	Surgical	Specialist	Non-Governmental Organizations	Part-Time	700-1400 JDs	>48	1-3 on-calls	Yes	No	No	Sometimes	Sometimes	Rarely	Sometimes	Sometimes	Almost Never	Never	Never	Never	Sometimes	Disagree	Neutral/Undecided	Disagree	Agree	Disagree
26	Male	Single	1-3 Persons	Owned Falt/House	Central (Amman, Zarqa, Madaba, Al-Balqaa)	Smoker	Medical	Resident	University Hospitals	Full-Time	<700 JDs	>48	1-3 on-calls	Yes	No	No	Rarely	Rarely	Rarely	Rarely	Rarely	Almost Never	Rarely	Rarely	Very Often	Rarely	Neutral/undecided	Neutral/Undecided	Agree	Agree	Neutral/Undecided
44	Male	Married	1-3 Persons	Owned Falt/House	Central (Amman, Zarqa, Madaba, Al-Balqaa)	Smoker	Surgical	Consultant	Private Hospitals/Clinics	Full-Time	>1400 JDs	40-48	1-3 on-calls	Yes	No	No	Almost Never	Almost Never	Almost Never	Almost Never	Almost Never	Almost Never	Almost Never	Almost Never	Almost Never	Almost Never	Strongly Agree	Strongly Agree	Strongly disagree	Strongly agree	Strongly disagree
70	Male	Married	1-3 Persons	Owned Falt/House	North (Irbid, Ajloun, Jerash, Mafraq)	Non-smoker	Medical	General Practitioner	Non-Governmental Organizations	Full-Time	700-1400 JDs	<40	0	Yes	No	No	Sometimes	Sometimes	Rarely	Rarely	Sometimes	Sometimes	Sometimes	Rarely	Sometimes	Rarely	Agree	Neutral/Undecided	Strongly disagree	Agree	Strongly disagree
40	Male	Married	4-6 Persons	Rented Falt/House	Central (Amman, Zarqa, Madaba, Al-Balqaa)	Non-smoker	Medical	Specialist	Jordanian Ministry of Health	Full-Time	700-1400 JDs	40-48	1-3 on-calls	Yes	No	No	Very Often	Sometimes	Rarely	Sometimes	Sometimes	Rarely	Never	Never	Always	Very Often	Neutral/undecided	Neutral/Undecided	Disagree	Neutral/Undecided	Disagree
33	Male	Married	1-3 Persons	Owned Falt/House	Central (Amman, Zarqa, Madaba, Al-Balqaa)	Non-smoker	Medical	Specialist	Jordanian Royal Medical Services	Full-Time	700-1400 JDs	<40	1-3 on-calls	No	No	No	Sometimes	Very Often	Sometimes	Sometimes	Sometimes	Often	Sometimes	Very Often	Often	Sometimes	Neutral/undecided	Neutral/Undecided	Disagree	Neutral/Undecided	Neutral/Undecided
27	Male	Single	4-6 Persons	Rented Falt/House	Central (Amman, Zarqa, Madaba, Al-Balqaa)	Smoker	Surgical	Resident	Non-Governmental Organizations	Full-Time	<700 JDs	>48	1-3 on-calls	Yes	No	No	Sometimes	Never	Never	Never	Never	Never	Never	Never	Rarely	Sometimes	Strongly Agree	Neutral/Undecided	Disagree	Agree	Strongly disagree
29	Male	Married	1-3 Persons	Rented Falt/House	Central (Amman, Zarqa, Madaba, Al-Balqaa)	Non-smoker	Surgical	Resident	Private Hospitals/Clinics	Full-Time	<700 JDs	40-48	1-3 on-calls	Yes	No	No	Sometimes	Sometimes	Never	Never	Never	Never	Never	Never	Never	Never	Agree	Strongly Agree	Strongly disagree	Strongly agree	Strongly disagree
45	Male	Married	4-6 Persons	Owned Falt/House	South (Aqapa, Karak, Maan, Tafileh)	Non-smoker	Surgical	Consultant	University Hospitals	Full-Time	>1400 JDs	40-48	0	Yes	No	No	Often	Often	Sometimes	Rarely	Rarely	Rarely	Sometimes	Sometimes	Rarely	Sometimes	Agree	Neutral/Undecided	Disagree	Agree	Disagree
31	Male	Married	1-3 Persons	Rented Falt/House	Central (Amman, Zarqa, Madaba, Al-Balqaa)	Smoker	Surgical	Specialist	Private Hospitals/Clinics	Full-Time	700-1400 JDs	40-48	0	Yes	No	No	Very Often	Sometimes	Almost Never	Never	Rarely	Sometimes	Sometimes	Never	Sometimes	Never	Agree	Agree	Strongly disagree	Agree	Strongly disagree
26	Female	Married	1-3 Persons	Rented Falt/House	Central (Amman, Zarqa, Madaba, Al-Balqaa)	Non-smoker	Medical	General Practitioner	Non-Governmental Organizations	Full-Time	700-1400 JDs	40-48	1-3 on-calls	Yes	No	No	Very Often	Sometimes	Sometimes	Sometimes	Sometimes	Often	Sometimes	Often	Rarely	Often	Agree	Disagree	Disagree	Disagree	Disagree
38	Male	Married	4-6 Persons	Rented Falt/House	North (Irbid, Ajloun, Jerash, Mafraq)	Non-smoker	Medical	Specialist	Jordanian Ministry of Health	Full-Time	700-1400 JDs	40-48	1-3 on-calls	No	No	No	Always	Often	Sometimes	Sometimes	Sometimes	Often	Sometimes	Sometimes	Always	Sometimes	Neutral/undecided	Disagree	Agree	Neutral/Undecided	Agree
69	Male	Married	4-6 Persons	Owned Falt/House	North (Irbid, Ajloun, Jerash, Mafraq)	Smoker	Medical	General Practitioner	Private Hospitals/Clinics	Full-Time	700-1400 JDs	40-48	0	Yes	No	No	Often	Often	Never	Rarely	Sometimes	Never	Rarely	Rarely	Rarely	Rarely	Agree	Agree	Disagree	Agree	Disagree
25	Female	Single	4-6 Persons	Owned Falt/House	Central (Amman, Zarqa, Madaba, Al-Balqaa)	Non-smoker	Surgical	Resident	Private Hospitals/Clinics	Full-Time	<700 JDs	40-48	>3	No	No	No	Often	Sometimes	Rarely	Rarely	Sometimes	Rarely	Very Often	Sometimes	Sometimes	Rarely	Neutral/undecided	Neutral/Undecided	Neutral/Undecided	Neutral/Undecided	Neutral/Undecided
59	Male	Married	4-6 Persons	Owned Falt/House	Central (Amman, Zarqa, Madaba, Al-Balqaa)	Non-smoker	Surgical	Consultant	Jordanian Ministry of Health	Full-Time	700-1400 JDs	>48	>3	Yes	No	No	Sometimes	Sometimes	Never	Rarely	Sometimes	Rarely	Sometimes	Sometimes	Rarely	Rarely	Disagree	Agree	Disagree	Agree	Disagree
26	Male	Single	1-3 Persons	Owned Falt/House	Central (Amman, Zarqa, Madaba, Al-Balqaa)	Non-smoker	Surgical	Resident	University Hospitals	Full-Time	<700 JDs	>48	1-3 on-calls	Yes	No	No	Rarely	Rarely	Rarely	Rarely	Never	Almost Never	Never	Almost Never	Never	Almost Never	Neutral/undecided	Neutral/Undecided	Disagree	Agree	Strongly disagree
25	Male	Single	1-3 Persons	Owned Falt/House	Central (Amman, Zarqa, Madaba, Al-Balqaa)	Non-smoker	Surgical	Resident	University Hospitals	Full-Time	<700 JDs	>48	1-3 on-calls	No	No	Yes	Sometimes	Often	Often	Sometimes	Almost Never	Rarely	Rarely	Almost Never	Almost Never	Rarely	Agree	Neutral/Undecided	Disagree	Neutral/Undecided	Disagree
58	Male	Married	4-6 Persons	Owned Falt/House	North (Irbid, Ajloun, Jerash, Mafraq)	Smoker	Medical	Consultant	Private Hospitals/Clinics	Full-Time	700-1400 JDs	40-48	0	Yes	No	Yes	Often	Sometimes	Sometimes	Sometimes	Often	Often	Often	Rarely	Sometimes	Often	Neutral/undecided	Neutral/Undecided	Neutral/Undecided	Agree	Neutral/Undecided
28	Female	Single	1-3 Persons	Owned Falt/House	Central (Amman, Zarqa, Madaba, Al-Balqaa)	Non-smoker	Surgical	Resident	Private Hospitals/Clinics	Full-Time	<700 JDs	>48	1-3 on-calls	No	No	No	Always	Very Often	Sometimes	Very Often	Very Often	Sometimes	Sometimes	Sometimes	Sometimes	Sometimes	Disagree	Disagree	Strongly Agree	Neutral/Undecided	Neutral/Undecided
28	Female	Single	1-3 Persons	Owned Falt/House	Central (Amman, Zarqa, Madaba, Al-Balqaa)	Non-smoker	Medical	Resident	University Hospitals	Full-Time	700-1400 JDs	40-48	>3	No	Yes	No	Often	Always	Almost Never	Very Often	Very Often	Very Often	Very Often	Sometimes	Rarely	Very Often	Neutral/undecided	Neutral/Undecided	Agree	Neutral/Undecided	Neutral/Undecided
25	Female	Single	>6 Persons	Rented Falt/House	Central (Amman, Zarqa, Madaba, Al-Balqaa)	Non-smoker	Medical	Resident	University Hospitals	Full-Time	700-1400 JDs	40-48	1-3 on-calls	Yes	No	No	Often	Often	Sometimes	Often	Sometimes	Often	Often	Often	Rarely	Sometimes	Disagree	Disagree	Neutral/Undecided	Disagree	Neutral/Undecided
25	Female	Single	>6 Persons	Owned Falt/House	Central (Amman, Zarqa, Madaba, Al-Balqaa)	Non-smoker	Medical	Resident	University Hospitals	Full-Time	<700 JDs	>48	1-3 on-calls	Yes	No	No	Often	Very Often	Very Often	Sometimes	Sometimes	Very Often	Always	Often	Always	Sometimes	Neutral/undecided	Neutral/Undecided	Agree	Neutral/Undecided	Disagree
31	Male	Single	4-6 Persons	Owned Falt/House	Central (Amman, Zarqa, Madaba, Al-Balqaa)	Smoker	Surgical	Specialist	Jordanian Royal Medical Services	Full-Time	700-1400 JDs	40-48	1-3 on-calls	Yes	No	No	Very Often	Very Often	Very Often	Very Often	Very Often	Very Often	Very Often	Very Often	Very Often	Very Often	Agree	Disagree	Agree	Disagree	Agree
28	Male	Single	4-6 Persons	Owned Falt/House	Central (Amman, Zarqa, Madaba, Al-Balqaa)	Non-smoker	Surgical	Resident	Private Hospitals/Clinics	Full-Time	<700 JDs	>48	1-3 on-calls	No	No	No	Often	Often	Sometimes	Sometimes	Rarely	Almost Never	Rarely	Almost Never	Rarely	Sometimes	Neutral/undecided	Neutral/Undecided	Neutral/Undecided	Neutral/Undecided	Disagree
25	Female	Single	4-6 Persons	Rented Falt/House	Central (Amman, Zarqa, Madaba, Al-Balqaa)	Non-smoker	Medical	Resident	Private Hospitals/Clinics	Full-Time	<700 JDs	40-48	1-3 on-calls	Yes	No	Yes	Sometimes	Often	Rarely	Sometimes	Almost Never	Sometimes	Rarely	Almost Never	Sometimes	Sometimes	Agree	Agree	Agree	Agree	Disagree
33	Male	Married	4-6 Persons	Owned Falt/House	Central (Amman, Zarqa, Madaba, Al-Balqaa)	Non-smoker	Medical	Specialist	Private Hospitals/Clinics	Full-Time	700-1400 JDs	40-48	1-3 on-calls	Yes	No	No	Often	Often	Rarely	Rarely	Sometimes	Rarely	Sometimes	Rarely	Rarely	Rarely	Agree	Neutral/Undecided	Disagree	Neutral/Undecided	Disagree
33	Male	Single	1-3 Persons	Owned Falt/House	Central (Amman, Zarqa, Madaba, Al-Balqaa)	Smoker	Medical	Resident	Private Hospitals/Clinics	Full-Time	<700 JDs	>48	1-3 on-calls	No	No	No	Very Often	Always	Sometimes	Very Often	Often	Often	Often	Sometimes	Often	Often	Strongly disagree	Strongly disagree	Neutral/Undecided	Disagree	Agree
42	Male	Married	4-6 Persons	Rented Falt/House	Central (Amman, Zarqa, Madaba, Al-Balqaa)	Smoker	Medical	Specialist	Jordanian Ministry of Health	Full-Time	700-1400 JDs	40-48	0	Yes	Yes	No	Sometimes	Very Often	Very Often	Often	Often	Often	Often	Very Often	Often	Often	Disagree	Neutral/Undecided	Agree	Agree	Neutral/Undecided
28	Male	Single	4-6 Persons	Owned Falt/House	Central (Amman, Zarqa, Madaba, Al-Balqaa)	Smoker	Surgical	Resident	Private Hospitals/Clinics	Full-Time	<700 JDs	>48	1-3 on-calls	No	No	No	Very Often	Very Often	Always	Always	Very Often	Always	Very Often	Very Often	Always	Very Often	Neutral/undecided	Neutral/Undecided	Agree	Disagree	Agree
31	Male	Married	>6 Persons	Owned Falt/House	Central (Amman, Zarqa, Madaba, Al-Balqaa)	Non-smoker	Medical	Specialist	Private Hospitals/Clinics	Full-Time	>1400 JDs	40-48	1-3 on-calls	Yes	No	No	Very Often	Very Often	Very Often	Very Often	Very Often	Very Often	Often	Rarely	Very Often	Very Often	Disagree	Disagree	Agree	Neutral/Undecided	Agree
42	Male	Married	1-3 Persons	Rented Falt/House	Central (Amman, Zarqa, Madaba, Al-Balqaa)	Non-smoker	Surgical	Resident	Jordanian Ministry of Health	Full-Time	<700 JDs	>48	1-3 on-calls	No	No	No	Sometimes	Often	Sometimes	Often	Often	Often	Often	Sometimes	Rarely	Rarely	Neutral/undecided	Neutral/Undecided	Disagree	Neutral/Undecided	Neutral/Undecided
32	Male	Married	1-3 Persons	Owned Falt/House	North (Irbid, Ajloun, Jerash, Mafraq)	Smoker	Medical	Specialist	Jordanian Ministry of Health	Full-Time	700-1400 JDs	40-48	>3	Yes	No	No	Sometimes	Often	Often	Often	Sometimes	Sometimes	Sometimes	Sometimes	Sometimes	Often	Neutral/undecided	Neutral/Undecided	Neutral/Undecided	Disagree	Strongly agree
44	Male	Married	1-3 Persons	Rented Falt/House	Central (Amman, Zarqa, Madaba, Al-Balqaa)	Non-smoker	Medical	Specialist	Jordanian Ministry of Health	Full-Time	700-1400 JDs	40-48	0	No	No	No	Sometimes	Always	Always	Always	Often	Often	Often	Always	Very Often	Always	Disagree	Strongly disagree	Disagree	Strongly disagree	Strongly disagree
28	Male	Single	4-6 Persons	Owned Falt/House	Central (Amman, Zarqa, Madaba, Al-Balqaa)	Smoker	Medical	General Practitioner	Jordanian Ministry of Health	Part-Time	<700 JDs	>48	>3	Yes	No	No	Rarely	Rarely	Sometimes	Sometimes	Sometimes	Almost Never	Sometimes	Rarely	Very Often	Rarely	Neutral/undecided	Agree	Agree	Agree	Agree
28	Male	Single	4-6 Persons	Owned Falt/House	Central (Amman, Zarqa, Madaba, Al-Balqaa)	Smoker	Medical	General Practitioner	Jordanian Ministry of Health	Part-Time	<700 JDs	>48	>3	Yes	No	No	Rarely	Rarely	Sometimes	Sometimes	Sometimes	Almost Never	Sometimes	Rarely	Very Often	Rarely	Neutral/undecided	Agree	Agree	Agree	Agree
40	Male	Married	4-6 Persons	Owned Falt/House	North (Irbid, Ajloun, Jerash, Mafraq)	Non-smoker	Medical	General Practitioner	Jordanian Ministry of Health	Full-Time	700-1400 JDs	40-48	0	Yes	No	No	Sometimes	Sometimes	Never	Never	Rarely	Never	Almost Never	Never	Sometimes	Rarely	Neutral/undecided	Agree	Disagree	Neutral/Undecided	Neutral/Undecided
30	Male	Single	1-3 Persons	Owned Falt/House	Central (Amman, Zarqa, Madaba, Al-Balqaa)	Smoker	Medical	Resident	Jordanian Ministry of Health	Full-Time	700-1400 JDs	>48	>3	Yes	No	No	Sometimes	Rarely	Rarely	Almost Never	Almost Never	Rarely	Never	Almost Never	Sometimes	Almost Never	Agree	Agree	Agree	Disagree	Disagree
31	Male	Married	1-3 Persons	Owned Falt/House	Central (Amman, Zarqa, Madaba, Al-Balqaa)	Non-smoker	Medical	Resident	Jordanian Ministry of Health	Full-Time	700-1400 JDs	>48	1-3 on-calls	Yes	No	No	Often	Sometimes	Rarely	Sometimes	Sometimes	Often	Often	Often	Often	Often	Disagree	Agree	Strongly Agree	Neutral/Undecided	Agree
64	Male	Married	1-3 Persons	Owned Falt/House	Central (Amman, Zarqa, Madaba, Al-Balqaa)	Smoker	Medical	Consultant	Private Hospitals/Clinics	Full-Time	>1400 JDs	>48	0	Yes	No	No	Sometimes	Sometimes	Rarely	Rarely	Almost Never	Almost Never	Sometimes	Almost Never	Never	Rarely	Agree	Agree	Disagree	Agree	Disagree
63	Male	Married	4-6 Persons	Owned Falt/House	North (Irbid, Ajloun, Jerash, Mafraq)	Smoker	Medical	Specialist	Jordanian Ministry of Health	Full-Time	>1400 JDs	40-48	1-3 on-calls	Yes	Yes	No	Sometimes	Sometimes	Sometimes	Rarely	Sometimes	Never	Never	Never	Never	Sometimes	Neutral/undecided	Neutral/Undecided	Neutral/Undecided	Neutral/Undecided	Neutral/Undecided
25	Male	Single	4-6 Persons	Owned Falt/House	Central (Amman, Zarqa, Madaba, Al-Balqaa)	Smoker	Medical	General Practitioner	Jordanian Ministry of Health	Part-Time	<700 JDs	40-48	0	Yes	No	No	Sometimes	Rarely	Sometimes	Sometimes	Rarely	Sometimes	Often	Often	Sometimes	Sometimes	Disagree	Neutral/Undecided	Agree	Disagree	Strongly agree
41	Male	Married	4-6 Persons	Owned Falt/House	Central (Amman, Zarqa, Madaba, Al-Balqaa)	Non-smoker	Surgical	Specialist	Private Hospitals/Clinics	Full-Time	700-1400 JDs	40-48	0	No	No	No	Very Often	Always	Often	Often	Sometimes	Sometimes	Rarely	Almost Never	Often	Sometimes	Agree	Agree	Neutral/Undecided	Strongly agree	Strongly disagree
36	Female	Married	4-6 Persons	Rented Falt/House	South (Aqapa, Karak, Maan, Tafileh)	Non-smoker	Medical	Specialist	Private Hospitals/Clinics	Full-Time	>1400 JDs	40-48	1-3 on-calls	No	No	No	Very Often	Often	Sometimes	Often	Rarely	Often	Often	Sometimes	Sometimes	Sometimes	Disagree	Neutral/Undecided	Agree	Neutral/Undecided	Neutral/Undecided
30	Male	Married	4-6 Persons	Owned Falt/House	North (Irbid, Ajloun, Jerash, Mafraq)	Smoker	Surgical	Resident	University Hospitals	Full-Time	<700 JDs	>48	1-3 on-calls	No	No	No	Always	Often	Rarely	Often	Rarely	Sometimes	Rarely	Never	Often	Sometimes	Agree	Agree	Agree	Agree	Disagree
49	Female	Married	1-3 Persons	Owned Falt/House	Central (Amman, Zarqa, Madaba, Al-Balqaa)	Non-smoker	Medical	Consultant	Private Hospitals/Clinics	Full-Time	>1400 JDs	40-48	1-3 on-calls	Yes	No	No	Very Often	Sometimes	Sometimes	Sometimes	Sometimes	Sometimes	Often	Sometimes	Sometimes	Sometimes	Neutral/undecided	Agree	Agree	Agree	Disagree
25	Male	Married	>6 Persons	Owned Falt/House	North (Irbid, Ajloun, Jerash, Mafraq)	Smoker	Surgical	Resident	University Hospitals	Full-Time	<700 JDs	>48	1-3 on-calls	Yes	No	No	Very Often	Often	Rarely	Rarely	Sometimes	Rarely	Often	Rarely	Rarely	Often	Neutral/undecided	Neutral/Undecided	Agree	Disagree	Disagree
32	Male	Single	4-6 Persons	Owned Falt/House	Central (Amman, Zarqa, Madaba, Al-Balqaa)	Smoker	Surgical	Specialist	Private Hospitals/Clinics	Part-Time	<700 JDs	<40	0	Yes	Yes	No	Sometimes	Sometimes	Often	Often	Sometimes	Sometimes	Sometimes	Sometimes	Often	Very Often	Strongly disagree	Strongly Agree	Agree	Strongly disagree	Strongly agree
43	Male	Married	4-6 Persons	Owned Falt/House	South (Aqapa, Karak, Maan, Tafileh)	Non-smoker	Medical	Specialist	Private Hospitals/Clinics	Full-Time	>1400 JDs	40-48	>3	Yes	No	Yes	Always	Rarely	Never	Never	Always	Rarely	Sometimes	Almost Never	Sometimes	Sometimes	Strongly Agree	Agree	Agree	Strongly agree	Disagree
55	Male	Married	1-3 Persons	Owned Falt/House	South (Aqapa, Karak, Maan, Tafileh)	Non-smoker	Medical	General Practitioner	Jordanian Ministry of Health	Full-Time	>1400 JDs	40-48	0	No	No	No	Sometimes	Never	Sometimes	Sometimes	Rarely	Sometimes	Never	Never	Never	Never	Agree	Agree	Disagree	Agree	Disagree
34	Male	Married	4-6 Persons	Owned Falt/House	Central (Amman, Zarqa, Madaba, Al-Balqaa)	Non-smoker	Medical	Specialist	Private Hospitals/Clinics	Full-Time	>1400 JDs	>48	1-3 on-calls	Yes	No	No	Sometimes	Often	Sometimes	Rarely	Rarely	Often	Sometimes	Rarely	Very Often	Sometimes	Neutral/undecided	Neutral/Undecided	Neutral/Undecided	Neutral/Undecided	Neutral/Undecided
28	Male	Married	1-3 Persons	Owned Falt/House	South (Aqapa, Karak, Maan, Tafileh)	Smoker	Medical	General Practitioner	Private Hospitals/Clinics	Full-Time	<700 JDs	>48	>3	Yes	Yes	No	Always	Always	Sometimes	Almost Never	Often	Often	Never	Never	Very Often	Almost Never	Strongly Agree	Neutral/Undecided	Neutral/Undecided	Strongly agree	Strongly agree
60	Male	Married	1-3 Persons	Owned Falt/House	South (Aqapa, Karak, Maan, Tafileh)	Smoker	Surgical	Consultant	Private Hospitals/Clinics	Full-Time	>1400 JDs	40-48	1-3 on-calls	Yes	No	No	Sometimes	Often	Sometimes	Sometimes	Rarely	Sometimes	Often	Almost Never	Sometimes	Sometimes	Agree	Neutral/Undecided	Agree	Agree	Disagree
25	Male	Single	4-6 Persons	Owned Falt/House	North (Irbid, Ajloun, Jerash, Mafraq)	Non-smoker	Surgical	Resident	University Hospitals	Full-Time	<700 JDs	40-48	1-3 on-calls	No	No	No	Always	Very Often	Sometimes	Often	Sometimes	Almost Never	Almost Never	Sometimes	Never	Sometimes	Strongly disagree	Disagree	Agree	Strongly disagree	Agree
31	Female	Married	4-6 Persons	Owned Falt/House	Central (Amman, Zarqa, Madaba, Al-Balqaa)	Non-smoker	Surgical	Specialist	Jordanian Ministry of Health	Full-Time	700-1400 JDs	<40	1-3 on-calls	No	No	Yes	Very Often	Very Often	Rarely	Often	Rarely	Often	Often	Rarely	Often	Sometimes	Neutral/undecided	Disagree	Agree	Disagree	Neutral/Undecided
25	Female	Single	1-3 Persons	Owned Falt/House	Central (Amman, Zarqa, Madaba, Al-Balqaa)	Non-smoker	Medical	General Practitioner	Private Hospitals/Clinics	Part-Time	<700 JDs	<40	0	Yes	No	No	Sometimes	Sometimes	Sometimes	Sometimes	Sometimes	Sometimes	Sometimes	Rarely	Sometimes	Sometimes	Disagree	Agree	Disagree	Agree	Disagree
33	Male	Single	>6 Persons	Rented Falt/House	North (Irbid, Ajloun, Jerash, Mafraq)	Smoker	Medical	Resident	Jordanian Ministry of Health	Full-Time	<700 JDs	40-48	>3	No	Yes	No	Often	Always	Sometimes	Often	Sometimes	Rarely	Always	Sometimes	Always	Rarely	Neutral/undecided	Agree	Neutral/Undecided	Agree	Neutral/Undecided
59	Male	Married	4-6 Persons	Owned Falt/House	South (Aqapa, Karak, Maan, Tafileh)	Smoker	Medical	Consultant	Private Hospitals/Clinics	Full-Time	>1400 JDs	<40	0	Yes	No	No	Rarely	Sometimes	Never	Sometimes	Never	Sometimes	Rarely	Never	Sometimes	Never	Agree	Agree	Disagree	Agree	Disagree
33	Male	Single	1-3 Persons	Owned Falt/House	South (Aqapa, Karak, Maan, Tafileh)	Non-smoker	Surgical	Specialist	Jordanian Royal Medical Services	Full-Time	700-1400 JDs	40-48	1-3 on-calls	Yes	No	No	Sometimes	Often	Often	Often	Often	Very Often	Sometimes	Sometimes	Sometimes	Sometimes	Neutral/undecided	Neutral/Undecided	Neutral/Undecided	Neutral/Undecided	Neutral/Undecided
35	Male	Single	1-3 Persons	Owned Falt/House	Central (Amman, Zarqa, Madaba, Al-Balqaa)	Smoker	Surgical	Consultant	Private Hospitals/Clinics	Full-Time	>1400 JDs	<40	0	Yes	No	No	Very Often	Often	Never	Very Often	Never	Very Often	Very Often	Never	Rarely	Almost Never	Neutral/undecided	Disagree	Agree	Strongly disagree	Strongly agree
60	Male	Married	1-3 Persons	Owned Falt/House	Central (Amman, Zarqa, Madaba, Al-Balqaa)	Non-smoker	Surgical	Consultant	Jordanian Ministry of Health	Full-Time	>1400 JDs	40-48	1-3 on-calls	Yes	No	No	Sometimes	Sometimes	Sometimes	Sometimes	Rarely	Very Often	Often	Almost Never	Sometimes	Sometimes	Neutral/undecided	Neutral/Undecided	Neutral/Undecided	Agree	Disagree
58	Male	Married	>6 Persons	Owned Falt/House	South (Aqapa, Karak, Maan, Tafileh)	Smoker	Medical	Consultant	Private Hospitals/Clinics	Full-Time	>1400 JDs	>48	1-3 on-calls	No	No	No	Never	Rarely	Never	Never	Never	Rarely	Never	Never	Never	Never	Disagree	Agree	Agree	Agree	Strongly disagree
70	Male	Married	4-6 Persons	Owned Falt/House	Central (Amman, Zarqa, Madaba, Al-Balqaa)	Smoker	Surgical	Consultant	Private Hospitals/Clinics	Part-Time	700-1400 JDs	<40	0	Yes	No	No	Sometimes	Rarely	Rarely	Rarely	Rarely	Rarely	Rarely	Rarely	Sometimes	Rarely	Neutral/undecided	Disagree	Disagree	Agree	Strongly disagree
50	Male	Married	>6 Persons	Owned Falt/House	Central (Amman, Zarqa, Madaba, Al-Balqaa)	Non-smoker	Medical	Consultant	Private Hospitals/Clinics	Full-Time	>1400 JDs	<40	0	Yes	No	No	Sometimes	Very Often	Rarely	Almost Never	Never	Almost Never	Never	Never	Never	Never	Strongly Agree	Strongly Agree	Strongly disagree	Agree	Disagree
39	Male	Married	4-6 Persons	Owned Falt/House	South (Aqapa, Karak, Maan, Tafileh)	Non-smoker	Surgical	Specialist	Private Hospitals/Clinics	Full-Time	700-1400 JDs	>48	>3	Yes	No	No	Sometimes	Sometimes	Sometimes	Sometimes	Rarely	Sometimes	Sometimes	Sometimes	Sometimes	Sometimes	Agree	Agree	Agree	Agree	Agree
60	Male	Married	>6 Persons	Owned Falt/House	Central (Amman, Zarqa, Madaba, Al-Balqaa)	Non-smoker	Surgical	Consultant	Private Hospitals/Clinics	Part-Time	700-1400 JDs	<40	0	Yes	No	No	Sometimes	Often	Almost Never	Never	Never	Never	Never	Never	Almost Never	Almost Never	Strongly Agree	Neutral/Undecided	Disagree	Agree	Strongly disagree
30	Male	Single	1-3 Persons	Owned Falt/House	Central (Amman, Zarqa, Madaba, Al-Balqaa)	Smoker	Surgical	Resident	Private Hospitals/Clinics	Full-Time	<700 JDs	>48	1-3 on-calls	No	No	No	Sometimes	Often	Sometimes	Often	Sometimes	Very Often	Very Often	Sometimes	Sometimes	Very Often	Neutral/undecided	Neutral/Undecided	Agree	Neutral/Undecided	Neutral/Undecided
68	Male	Married	4-6 Persons	Owned Falt/House	Central (Amman, Zarqa, Madaba, Al-Balqaa)	Non-smoker	Medical	Specialist	Private Hospitals/Clinics	Full-Time	>1400 JDs	40-48	0	Yes	No	No	Rarely	Sometimes	Almost Never	Rarely	Almost Never	Almost Never	Sometimes	Almost Never	Often	Sometimes	Agree	Agree	Disagree	Agree	Disagree
69	Male	Married	>6 Persons	Owned Falt/House	Central (Amman, Zarqa, Madaba, Al-Balqaa)	Non-smoker	Surgical	Consultant	Private Hospitals/Clinics	Part-Time	700-1400 JDs	<40	0	Yes	No	No	Almost Never	Almost Never	Never	Almost Never	Rarely	Rarely	Rarely	Almost Never	Almost Never	Almost Never	Neutral/undecided	Agree	Strongly disagree	Strongly agree	Strongly disagree
30	Male	Single	4-6 Persons	Owned Falt/House	Central (Amman, Zarqa, Madaba, Al-Balqaa)	Non-smoker	Medical	Specialist	Jordanian Royal Medical Services	Full-Time	700-1400 JDs	<40	1-3 on-calls	Yes	No	Yes	Often	Sometimes	Sometimes	Sometimes	Sometimes	Sometimes	Sometimes	Sometimes	Sometimes	Sometimes	Neutral/undecided	Disagree	Agree	Neutral/Undecided	Agree
34	Male	Married	1-3 Persons	Rented Falt/House	Central (Amman, Zarqa, Madaba, Al-Balqaa)	Non-smoker	Surgical	Resident	Private Hospitals/Clinics	Full-Time	700-1400 JDs	40-48	0	Yes	Yes	No	Sometimes	Never	Never	Never	Never	Never	Almost Never	Never	Never	Never	Strongly Agree	Neutral/Undecided	Neutral/Undecided	Strongly agree	Strongly disagree
27	Male	Single	4-6 Persons	Owned Falt/House	Central (Amman, Zarqa, Madaba, Al-Balqaa)	Non-smoker	Surgical	Resident	Private Hospitals/Clinics	Full-Time	<700 JDs	>48	1-3 on-calls	No	No	No	Sometimes	Sometimes	Rarely	Sometimes	Rarely	Often	Sometimes	Sometimes	Often	Sometimes	Neutral/undecided	Neutral/Undecided	Disagree	Neutral/Undecided	Disagree
25	Female	Single	4-6 Persons	Owned Falt/House	Central (Amman, Zarqa, Madaba, Al-Balqaa)	Non-smoker	Medical	Resident	University Hospitals	Full-Time	700-1400 JDs	40-48	1-3 on-calls	Yes	No	No	Often	Often	Rarely	Sometimes	Sometimes	Sometimes	Sometimes	Rarely	Very Often	Sometimes	Agree	Neutral/Undecided	Agree	Agree	Disagree
30	Male	Single	1-3 Persons	Owned Falt/House	Central (Amman, Zarqa, Madaba, Al-Balqaa)	Smoker	Surgical	Resident	Private Hospitals/Clinics	Full-Time	<700 JDs	>48	1-3 on-calls	No	No	No	Sometimes	Often	Sometimes	Often	Sometimes	Very Often	Very Often	Sometimes	Sometimes	Very Often	Neutral/undecided	Neutral/Undecided	Agree	Neutral/Undecided	Neutral/Undecided
28	Male	Single	4-6 Persons	Owned Falt/House	South (Aqapa, Karak, Maan, Tafileh)	Smoker	Medical	General Practitioner	Jordanian Ministry of Health	Full-Time	<700 JDs	>48	1-3 on-calls	Yes	No	Yes	Very Often	Sometimes	Always	Always	Rarely	Always	Very Often	Sometimes	Often	Sometimes	Strongly disagree	Strongly disagree	Strongly Agree	Strongly disagree	Strongly agree
36	Male	Married	1-3 Persons	Owned Falt/House	Central (Amman, Zarqa, Madaba, Al-Balqaa)	Smoker	Surgical	Resident	Jordanian Ministry of Health	Full-Time	700-1400 JDs	40-48	>3	No	No	Yes	Sometimes	Often	Sometimes	Sometimes	Sometimes	Sometimes	Rarely	Rarely	Often	Sometimes	Neutral/undecided	Agree	Disagree	Neutral/Undecided	Neutral/Undecided
35	Male	Married	4-6 Persons	Owned Falt/House	Central (Amman, Zarqa, Madaba, Al-Balqaa)	Smoker	Medical	Consultant	University Hospitals	Full-Time	>1400 JDs	40-48	0	Yes	No	No	Almost Never	Rarely	Rarely	Rarely	Never	Often	Sometimes	Rarely	Never	Never	Neutral/undecided	Neutral/Undecided	Neutral/Undecided	Neutral/Undecided	Neutral/Undecided
31	Male	Single	1-3 Persons	Owned Falt/House	Central (Amman, Zarqa, Madaba, Al-Balqaa)	Smoker	Surgical	Specialist	Private Hospitals/Clinics	Part-Time	<700 JDs	<40	0	No	No	No	Often	Sometimes	Sometimes	Sometimes	Sometimes	Sometimes	Sometimes	Sometimes	Sometimes	Sometimes	Disagree	Neutral/Undecided	Neutral/Undecided	Neutral/Undecided	Neutral/Undecided
33	Male	Married	4-6 Persons	Owned Falt/House	North (Irbid, Ajloun, Jerash, Mafraq)	Smoker	Surgical	Specialist	Jordanian Royal Medical Services	Full-Time	700-1400 JDs	40-48	1-3 on-calls	No	No	No	Often	Often	Rarely	Sometimes	Sometimes	Rarely	Sometimes	Sometimes	Sometimes	Sometimes	Agree	Neutral/Undecided	Neutral/Undecided	Agree	Disagree
25	Male	Single	4-6 Persons	Owned Falt/House	Central (Amman, Zarqa, Madaba, Al-Balqaa)	Smoker	Medical	General Practitioner	Jordanian Ministry of Health	Part-Time	<700 JDs	40-48	0	Yes	No	No	Sometimes	Rarely	Sometimes	Sometimes	Rarely	Sometimes	Often	Often	Sometimes	Sometimes	Disagree	Neutral/Undecided	Agree	Disagree	Strongly agree
35	Male	Married	4-6 Persons	Owned Falt/House	Central (Amman, Zarqa, Madaba, Al-Balqaa)	Smoker	Medical	Consultant	University Hospitals	Full-Time	>1400 JDs	40-48	0	Yes	No	No	Almost Never	Rarely	Rarely	Rarely	Never	Often	Sometimes	Rarely	Never	Never	Neutral/undecided	Neutral/Undecided	Neutral/Undecided	Neutral/Undecided	Neutral/Undecided
39	Male	Married	4-6 Persons	Rented Falt/House	Central (Amman, Zarqa, Madaba, Al-Balqaa)	Smoker	Surgical	Consultant	Private Hospitals/Clinics	Full-Time	>1400 JDs	<40	0	Yes	No	No	Sometimes	Sometimes	Almost Never	Rarely	Rarely	Sometimes	Rarely	Never	Very Often	Rarely	Agree	Neutral/Undecided	Disagree	Neutral/Undecided	Disagree
27	Male	Married	1-3 Persons	Rented Falt/House	North (Irbid, Ajloun, Jerash, Mafraq)	Non-smoker	Medical	Resident	University Hospitals	Full-Time	<700 JDs	>48	1-3 on-calls	Yes	No	No	Very Often	Often	Sometimes	Rarely	Rarely	Rarely	Rarely	Almost Never	Sometimes	Sometimes	Neutral/undecided	Neutral/Undecided	Agree	Neutral/Undecided	Disagree
36	Male	Married	1-3 Persons	Owned Falt/House	Central (Amman, Zarqa, Madaba, Al-Balqaa)	Smoker	Medical	Resident	Jordanian Ministry of Health	Full-Time	700-1400 JDs	>48	>3	No	Yes	Yes	Always	Sometimes	Often	Sometimes	Sometimes	Very Often	Sometimes	Sometimes	Very Often	Sometimes	Disagree	Disagree	Agree	Disagree	Agree
30	Male	Married	1-3 Persons	Rented Falt/House	Central (Amman, Zarqa, Madaba, Al-Balqaa)	Non-smoker	Medical	Resident	Jordanian Ministry of Health	Full-Time	<700 JDs	40-48	1-3 on-calls	Yes	Yes	No	Sometimes	Sometimes	Sometimes	Rarely	Almost Never	Sometimes	Sometimes	Almost Never	Rarely	Rarely	Agree	Agree	Disagree	Agree	Neutral/Undecided
32	Male	Single	1-3 Persons	Rented Falt/House	Central (Amman, Zarqa, Madaba, Al-Balqaa)	Smoker	Surgical	Specialist	Private Hospitals/Clinics	Full-Time	>1400 JDs	40-48	0	Yes	No	No	Often	Sometimes	Rarely	Often	Rarely	Sometimes	Rarely	Almost Never	Sometimes	Sometimes	Disagree	Neutral/Undecided	Neutral/Undecided	Neutral/Undecided	Neutral/Undecided
32	Male	Single	4-6 Persons	Owned Falt/House	Central (Amman, Zarqa, Madaba, Al-Balqaa)	Non-smoker	Surgical	Resident	Jordanian Ministry of Health	Full-Time	700-1400 JDs	>48	1-3 on-calls	No	No	No	Very Often	Very Often	Very Often	Very Often	Often	Very Often	Often	Often	Often	Often	Strongly disagree	Strongly disagree	Strongly Agree	Strongly disagree	Strongly agree
32	Male	Single	4-6 Persons	Owned Falt/House	Central (Amman, Zarqa, Madaba, Al-Balqaa)	Non-smoker	Surgical	Resident	Jordanian Ministry of Health	Full-Time	700-1400 JDs	>48	1-3 on-calls	No	No	No	Very Often	Very Often	Very Often	Very Often	Often	Very Often	Often	Often	Often	Often	Strongly disagree	Strongly disagree	Strongly Agree	Strongly disagree	Strongly agree
38	Male	Married	1-3 Persons	Rented Falt/House	Central (Amman, Zarqa, Madaba, Al-Balqaa)	Smoker	Medical	General Practitioner	Jordanian Ministry of Health	Full-Time	700-1400 JDs	40-48	0	Yes	No	Yes	Rarely	Never	Never	Never	Never	Rarely	Very Often	Almost Never	Sometimes	Never	Neutral/undecided	Neutral/Undecided	Disagree	Disagree	Strongly disagree
26	Female	Single	>6 Persons	Owned Falt/House	Central (Amman, Zarqa, Madaba, Al-Balqaa)	Non-smoker	Medical	Resident	University Hospitals	Part-Time	<700 JDs	>48	1-3 on-calls	Yes	No	No	Often	Very Often	Sometimes	Often	Rarely	Rarely	Often	Rarely	Very Often	Very Often	Neutral/undecided	Neutral/Undecided	Agree	Neutral/Undecided	Disagree
32	Male	Single	1-3 Persons	Owned Falt/House	Central (Amman, Zarqa, Madaba, Al-Balqaa)	Non-smoker	Medical	Resident	Private Hospitals/Clinics	Full-Time	<700 JDs	40-48	1-3 on-calls	Yes	No	No	Often	Rarely	Almost Never	Rarely	Almost Never	Never	Never	Never	Almost Never	Sometimes	Strongly disagree	Strongly Agree	Neutral/Undecided	Strongly agree	Strongly disagree
35	Male	Married	>6 Persons	Rented Falt/House	Central (Amman, Zarqa, Madaba, Al-Balqaa)	Smoker	Surgical	Resident	Jordanian Ministry of Health	Full-Time	700-1400 JDs	>48	1-3 on-calls	No	No	Yes	Always	Sometimes	Always	Always	Always	Always	Very Often	Very Often	Always	Very Often	Strongly disagree	Neutral/Undecided	Agree	Disagree	Disagree
24	Male	Single	4-6 Persons	Owned Falt/House	Central (Amman, Zarqa, Madaba, Al-Balqaa)	Non-smoker	Medical	General Practitioner	Jordanian Ministry of Health	Part-Time	<700 JDs	<40	1-3 on-calls	No	No	No	Always	Sometimes	Always	Always	Often	Always	Always	Often	Always	Always	Strongly disagree	Neutral/Undecided	Strongly Agree	Strongly disagree	Agree
24	Female	Single	>6 Persons	Owned Falt/House	Central (Amman, Zarqa, Madaba, Al-Balqaa)	Non-smoker	Medical	Resident	University Hospitals	Full-Time	<700 JDs	40-48	1-3 on-calls	Yes	No	No	Often	Sometimes	Sometimes	Sometimes	Rarely	Sometimes	Sometimes	Never	Sometimes	Rarely	Agree	Agree	Agree	Agree	Disagree
32	Male	Married	1-3 Persons	Rented Falt/House	Central (Amman, Zarqa, Madaba, Al-Balqaa)	Non-smoker	Surgical	Resident	Jordanian Ministry of Health	Full-Time	700-1400 JDs	>48	>3	No	No	No	Very Often	Very Often	Very Often	Very Often	Often	Sometimes	Sometimes	Rarely	Rarely	Often	Disagree	Disagree	Agree	Disagree	Agree
25	Male	Single	4-6 Persons	Owned Falt/House	Central (Amman, Zarqa, Madaba, Al-Balqaa)	Non-smoker	Medical	General Practitioner	Jordanian Ministry of Health	Part-Time	<700 JDs	<40	1-3 on-calls	Yes	No	No	Sometimes	Rarely	Often	Very Often	Sometimes	Very Often	Rarely	Rarely	Often	Very Often	Agree	Agree	Strongly Agree	Strongly agree	Neutral/Undecided
34	Female	Married	4-6 Persons	Rented Falt/House	Central (Amman, Zarqa, Madaba, Al-Balqaa)	Non-smoker	Surgical	Specialist	Jordanian Ministry of Health	Full-Time	700-1400 JDs	<40	0	No	Yes	No	Sometimes	Sometimes	Very Often	Sometimes	Sometimes	Sometimes	Sometimes	Sometimes	Sometimes	Rarely	Neutral/undecided	Agree	Disagree	Agree	Strongly agree
26	Male	Single	4-6 Persons	Owned Falt/House	North (Irbid, Ajloun, Jerash, Mafraq)	Non-smoker	Medical	General Practitioner	Private Hospitals/Clinics	Part-Time	<700 JDs	<40	0	Yes	No	Yes	Sometimes	Sometimes	Always	Very Often	Very Often	Often	Often	Sometimes	Sometimes	Sometimes	Agree	Neutral/Undecided	Agree	Strongly disagree	Agree
39	Female	Married	4-6 Persons	Owned Falt/House	Central (Amman, Zarqa, Madaba, Al-Balqaa)	Non-smoker	Medical	Consultant	Jordanian Ministry of Health	Full-Time	700-1400 JDs	<40	1-3 on-calls	No	No	No	Sometimes	Very Often	Sometimes	Often	Often	Often	Often	Never	Never	Sometimes	Neutral/undecided	Neutral/Undecided	Neutral/Undecided	Neutral/Undecided	Neutral/Undecided
26	Male	Single	1-3 Persons	Owned Falt/House	Central (Amman, Zarqa, Madaba, Al-Balqaa)	Smoker	Medical	General Practitioner	Private Hospitals/Clinics	Part-Time	<700 JDs	<40	0	No	No	No	Rarely	Rarely	Rarely	Rarely	Sometimes	Rarely	Rarely	Rarely	Rarely	Rarely	Agree	Agree	Disagree	Agree	Disagree
31	Male	Married	1-3 Persons	Owned Falt/House	Central (Amman, Zarqa, Madaba, Al-Balqaa)	Non-smoker	Medical	General Practitioner	Jordanian Ministry of Health	Full-Time	<700 JDs	>48	1-3 on-calls	Yes	No	No	Often	Rarely	Sometimes	Sometimes	Rarely	Sometimes	Almost Never	Rarely	Sometimes	Sometimes	Agree	Neutral/Undecided	Agree	Neutral/Undecided	Neutral/Undecided
33	Male	Married	1-3 Persons	Owned Falt/House	Central (Amman, Zarqa, Madaba, Al-Balqaa)	Smoker	Surgical	Specialist	Private Hospitals/Clinics	Full-Time	700-1400 JDs	40-48	0	Yes	No	No	Sometimes	Sometimes	Sometimes	Sometimes	Sometimes	Sometimes	Sometimes	Sometimes	Sometimes	Sometimes	Neutral/undecided	Neutral/Undecided	Disagree	Disagree	Neutral/Undecided
28	Male	Married	>6 Persons	Rented Falt/House	North (Irbid, Ajloun, Jerash, Mafraq)	Smoker	Medical	General Practitioner	Private Hospitals/Clinics	Full-Time	<700 JDs	>48	>3	Yes	No	No	Always	Often	Often	Often	Often	Often	Often	Sometimes	Always	Often	Neutral/undecided	Neutral/Undecided	Agree	Strongly disagree	Neutral/Undecided
27	Male	Single	4-6 Persons	Owned Falt/House	North (Irbid, Ajloun, Jerash, Mafraq)	Non-smoker	Medical	General Practitioner	Private Hospitals/Clinics	Part-Time	<700 JDs	>48	1-3 on-calls	No	No	No	Always	Very Often	Very Often	Very Often	Very Often	Very Often	Very Often	Very Often	Very Often	Always	Agree	Agree	Agree	Disagree	Agree
30	Male	Single	1-3 Persons	Rented Falt/House	Central (Amman, Zarqa, Madaba, Al-Balqaa)	Non-smoker	Medical	Resident	Jordanian Ministry of Health	Full-Time	>1400 JDs	40-48	1-3 on-calls	Yes	Yes	No	Sometimes	Always	Sometimes	Sometimes	Never	Never	Rarely	Almost Never	Sometimes	Often	Neutral/undecided	Neutral/Undecided	Disagree	Neutral/Undecided	Neutral/Undecided
39	Male	Married	1-3 Persons	Owned Falt/House	Central (Amman, Zarqa, Madaba, Al-Balqaa)	Smoker	Medical	Resident	Jordanian Ministry of Health	Full-Time	<700 JDs	40-48	0	No	No	No	Never	Never	Never	Never	Never	Never	Never	Never	Never	Never	Neutral/undecided	Neutral/Undecided	Neutral/Undecided	Neutral/Undecided	Neutral/Undecided
32	Male	Married	1-3 Persons	Owned Falt/House	Central (Amman, Zarqa, Madaba, Al-Balqaa)	Non-smoker	Medical	Specialist	Private Hospitals/Clinics	Full-Time	>1400 JDs	>48	1-3 on-calls	Yes	No	Yes	Very Often	Very Often	Often	Very Often	Often	Often	Rarely	Often	Rarely	Sometimes	Strongly disagree	Strongly disagree	Strongly Agree	Strongly disagree	Strongly agree
26	Male	Single	1-3 Persons	Owned Falt/House	Central (Amman, Zarqa, Madaba, Al-Balqaa)	Smoker	Medical	General Practitioner	Non-Governmental Organizations	Full-Time	<700 JDs	40-48	0	Yes	No	No	Often	Often	Rarely	Sometimes	Sometimes	Rarely	Rarely	Almost Never	Almost Never	Almost Never	Agree	Disagree	Disagree	Agree	Disagree
33	Female	Married	4-6 Persons	Owned Falt/House	Central (Amman, Zarqa, Madaba, Al-Balqaa)	Smoker	Surgical	Resident	Jordanian Ministry of Health	Full-Time	<700 JDs	>48	1-3 on-calls	No	No	No	Often	Very Often	Often	Very Often	Often	Sometimes	Sometimes	Rarely	Rarely	Rarely	Neutral/undecided	Neutral/Undecided	Neutral/Undecided	Neutral/Undecided	Disagree
30	Male	Married	4-6 Persons	Owned Falt/House	Central (Amman, Zarqa, Madaba, Al-Balqaa)	Non-smoker	Medical	Specialist	Jordanian Ministry of Health	Part-Time	700-1400 JDs	<40	>3	Yes	No	No	Rarely	Sometimes	Sometimes	Sometimes	Sometimes	Sometimes	Rarely	Sometimes	Rarely	Rarely	Agree	Neutral/Undecided	Agree	Agree	Disagree
46	Male	Single	1-3 Persons	Rented Falt/House	Central (Amman, Zarqa, Madaba, Al-Balqaa)	Non-smoker	Medical	General Practitioner	Private Hospitals/Clinics	Full-Time	<700 JDs	<40	0	Yes	No	No	Sometimes	Often	Often	Very Often	Never	Often	Rarely	Almost Never	Never	Sometimes	Neutral/undecided	Agree	Strongly disagree	Strongly agree	Strongly disagree
27	Male	Single	4-6 Persons	Owned Falt/House	Central (Amman, Zarqa, Madaba, Al-Balqaa)	Non-smoker	Medical	General Practitioner	Jordanian Ministry of Health	Part-Time	<700 JDs	>48	1-3 on-calls	Yes	No	No	Very Often	Often	Often	Sometimes	Often	Sometimes	Very Often	Sometimes	Often	Sometimes	Neutral/undecided	Neutral/Undecided	Agree	Neutral/Undecided	Neutral/Undecided
27	Male	Single	4-6 Persons	Owned Falt/House	Central (Amman, Zarqa, Madaba, Al-Balqaa)	Smoker	Medical	General Practitioner	Private Hospitals/Clinics	Full-Time	<700 JDs	40-48	0	No	No	No	Sometimes	Often	Sometimes	Often	Sometimes	Sometimes	Rarely	Rarely	Often	Rarely	Strongly disagree	Neutral/Undecided	Neutral/Undecided	Disagree	Neutral/Undecided
31	Male	Single	>6 Persons	Owned Falt/House	Central (Amman, Zarqa, Madaba, Al-Balqaa)	Smoker	Medical	General Practitioner	Private Hospitals/Clinics	Part-Time	<700 JDs	<40	1-3 on-calls	Yes	No	No	Often	Often	Often	Often	Often	Often	Sometimes	Sometimes	Sometimes	Sometimes	Agree	Neutral/Undecided	Neutral/Undecided	Neutral/Undecided	Neutral/Undecided
34	Male	Married	4-6 Persons	Owned Falt/House	North (Irbid, Ajloun, Jerash, Mafraq)	Non-smoker	Surgical	Specialist	Jordanian Royal Medical Services	Full-Time	700-1400 JDs	>48	1-3 on-calls	No	No	No	Sometimes	Always	Very Often	Very Often	Sometimes	Sometimes	Sometimes	Rarely	Rarely	Rarely	Disagree	Neutral/Undecided	Disagree	Neutral/Undecided	Agree
24	Male	Single	1-3 Persons	Rented Falt/House	Central (Amman, Zarqa, Madaba, Al-Balqaa)	Smoker	Surgical	Resident	Jordanian Ministry of Health	Full-Time	<700 JDs	>48	1-3 on-calls	No	No	No	Sometimes	Often	Almost Never	Rarely	Almost Never	Often	Very Often	Never	Sometimes	Sometimes	Agree	Neutral/Undecided	Neutral/Undecided	Agree	Disagree
31	Male	Married	1-3 Persons	Owned Falt/House	Central (Amman, Zarqa, Madaba, Al-Balqaa)	Non-smoker	Surgical	Specialist	Private Hospitals/Clinics	Full-Time	>1400 JDs	40-48	0	Yes	No	No	Often	Very Often	Sometimes	Sometimes	Sometimes	Almost Never	Sometimes	Never	Never	Rarely	Neutral/undecided	Neutral/Undecided	Neutral/Undecided	Neutral/Undecided	Neutral/Undecided
34	Male	Married	4-6 Persons	Owned Falt/House	Central (Amman, Zarqa, Madaba, Al-Balqaa)	Smoker	Surgical	Resident	Jordanian Ministry of Health	Full-Time	700-1400 JDs	>48	1-3 on-calls	Yes	No	Yes	Always	Always	Always	Very Often	Often	Very Often	Very Often	Very Often	Sometimes	Often	Neutral/undecided	Neutral/Undecided	Neutral/Undecided	Neutral/Undecided	Agree
26	Female	Single	>6 Persons	Owned Falt/House	South (Aqapa, Karak, Maan, Tafileh)	Non-smoker	Medical	General Practitioner	Jordanian Ministry of Health	Part-Time	700-1400 JDs	>48	1-3 on-calls	Yes	No	No	Often	Often	Often	Often	Often	Often	Often	Often	Often	Often	Neutral/undecided	Disagree	Agree	Disagree	Agree
30	Male	Married	1-3 Persons	Owned Falt/House	Central (Amman, Zarqa, Madaba, Al-Balqaa)	Smoker	Surgical	Resident	Jordanian Ministry of Health	Full-Time	700-1400 JDs	>48	1-3 on-calls	No	No	Yes	Often	Often	Sometimes	Often	Often	Often	Sometimes	Very Often	Rarely	Sometimes	Disagree	Disagree	Neutral/Undecided	Neutral/Undecided	Agree
34	Female	Single	1-3 Persons	Rented Falt/House	Central (Amman, Zarqa, Madaba, Al-Balqaa)	Non-smoker	Medical	Resident	Jordanian Royal Medical Services	Full-Time	<700 JDs	>48	1-3 on-calls	No	No	No	Often	Sometimes	Sometimes	Often	Sometimes	Always	Very Often	Sometimes	Sometimes	Sometimes	Disagree	Neutral/Undecided	Neutral/Undecided	Neutral/Undecided	Agree
40	Male	Single	1-3 Persons	Rented Falt/House	Central (Amman, Zarqa, Madaba, Al-Balqaa)	Non-smoker	Medical	Specialist	Jordanian Ministry of Health	Full-Time	>1400 JDs	40-48	0	Yes	No	No	Sometimes	Very Often	Almost Never	Sometimes	Almost Never	Often	Sometimes	Rarely	Very Often	Very Often	Agree	Agree	Agree	Disagree	Disagree
29	Female	Single	4-6 Persons	Owned Falt/House	Central (Amman, Zarqa, Madaba, Al-Balqaa)	Non-smoker	Surgical	Resident	Jordanian Ministry of Health	Full-Time	<700 JDs	<40	1-3 on-calls	Yes	No	No	Very Often	Often	Often	Very Often	Very Often	Always	Often	Rarely	Always	Sometimes	Neutral/undecided	Agree	Agree	Agree	Disagree
30	Male	Single	1-3 Persons	Owned Falt/House	Central (Amman, Zarqa, Madaba, Al-Balqaa)	Smoker	Medical	Resident	Jordanian Ministry of Health	Part-Time	<700 JDs	40-48	0	Yes	No	Yes	Very Often	Sometimes	Rarely	Rarely	Rarely	Sometimes	Sometimes	Almost Never	Often	Often	Neutral/undecided	Neutral/Undecided	Agree	Neutral/Undecided	Neutral/Undecided
28	Female	Single	4-6 Persons	Owned Falt/House	Central (Amman, Zarqa, Madaba, Al-Balqaa)	Non-smoker	Surgical	Resident	Jordanian Royal Medical Services	Full-Time	700-1400 JDs	40-48	1-3 on-calls	Yes	No	No	Sometimes	Often	Rarely	Rarely	Never	Sometimes	Rarely	Never	Rarely	Sometimes	Agree	Neutral/Undecided	Disagree	Disagree	Disagree
31	Male	Married	1-3 Persons	Rented Falt/House	Central (Amman, Zarqa, Madaba, Al-Balqaa)	Non-smoker	Surgical	Specialist	Private Hospitals/Clinics	Full-Time	700-1400 JDs	40-48	0	Yes	No	No	Sometimes	Rarely	Rarely	Rarely	Rarely	Rarely	Rarely	Sometimes	Almost Never	Almost Never	Disagree	Disagree	Strongly disagree	Strongly agree	Disagree
32	Male	Married	1-3 Persons	Rented Falt/House	North (Irbid, Ajloun, Jerash, Mafraq)	Non-smoker	Surgical	Resident	University Hospitals	Full-Time	700-1400 JDs	>48	1-3 on-calls	Yes	No	No	Sometimes	Sometimes	Sometimes	Often	Sometimes	Sometimes	Sometimes	Sometimes	Sometimes	Sometimes	Neutral/undecided	Neutral/Undecided	Neutral/Undecided	Neutral/Undecided	Disagree
28	Female	Single	4-6 Persons	Owned Falt/House	Central (Amman, Zarqa, Madaba, Al-Balqaa)	Non-smoker	Medical	Resident	Jordanian Ministry of Health	Full-Time	<700 JDs	40-48	1-3 on-calls	No	No	Yes	Very Often	Very Often	Very Often	Very Often	Always	Very Often	Very Often	Often	Often	Very Often	Disagree	Disagree	Agree	Disagree	Agree
31	Female	Single	4-6 Persons	Owned Falt/House	Central (Amman, Zarqa, Madaba, Al-Balqaa)	Non-smoker	Medical	Specialist	Jordanian Royal Medical Services	Full-Time	700-1400 JDs	>48	0	No	No	No	Often	Very Often	Sometimes	Often	Often	Very Often	Sometimes	Very Often	Sometimes	Often	Neutral/undecided	Neutral/Undecided	Disagree	Agree	Disagree
34	Male	Married	>6 Persons	Owned Falt/House	Central (Amman, Zarqa, Madaba, Al-Balqaa)	Non-smoker	Medical	Resident	Jordanian Ministry of Health	Full-Time	<700 JDs	>48	1-3 on-calls	No	No	Yes	Always	Always	Rarely	Always	Rarely	Always	Always	Very Often	Always	Always	Strongly disagree	Strongly disagree	Strongly Agree	Strongly disagree	Strongly agree
30	Male	Single	4-6 Persons	Owned Falt/House	Central (Amman, Zarqa, Madaba, Al-Balqaa)	Smoker	Surgical	Resident	Jordanian Ministry of Health	Full-Time	<700 JDs	40-48	1-3 on-calls	No	No	No	Sometimes	Very Often	Rarely	Rarely	Almost Never	Almost Never	Sometimes	Never	Sometimes	Rarely	Agree	Neutral/Undecided	Neutral/Undecided	Agree	Disagree
28	Female	Married	1-3 Persons	Rented Falt/House	Central (Amman, Zarqa, Madaba, Al-Balqaa)	Non-smoker	Surgical	Resident	Jordanian Royal Medical Services	Full-Time	700-1400 JDs	40-48	1-3 on-calls	No	No	No	Very Often	Very Often	Very Often	Often	Almost Never	Very Often	Often	Almost Never	Never	Very Often	Strongly disagree	Neutral/Undecided	Agree	Disagree	Neutral/Undecided
26	Female	Single	4-6 Persons	Owned Falt/House	North (Irbid, Ajloun, Jerash, Mafraq)	Non-smoker	Medical	Resident	Jordanian Ministry of Health	Full-Time	<700 JDs	<40	1-3 on-calls	No	No	No	Sometimes	Very Often	Often	Always	Sometimes	Often	Sometimes	Very Often	Sometimes	Sometimes	Strongly Agree	Neutral/Undecided	Disagree	Disagree	Agree
28	Female	Single	4-6 Persons	Owned Falt/House	Central (Amman, Zarqa, Madaba, Al-Balqaa)	Non-smoker	Medical	Resident	Jordanian Royal Medical Services	Full-Time	700-1400 JDs	40-48	1-3 on-calls	Yes	No	No	Sometimes	Rarely	Rarely	Sometimes	Rarely	Sometimes	Sometimes	Rarely	Rarely	Rarely	Neutral/undecided	Neutral/Undecided	Disagree	Neutral/Undecided	Neutral/Undecided
27	Male	Married	1-3 Persons	Rented Falt/House	South (Aqapa, Karak, Maan, Tafileh)	Smoker	Surgical	Resident	Jordanian Ministry of Health	Full-Time	<700 JDs	>48	>3	No	No	No	Always	Always	Always	Always	Often	Always	Always	Often	Always	Often	Disagree	Strongly Agree	Strongly Agree	Strongly disagree	Strongly agree
28	Male	Married	4-6 Persons	Owned Falt/House	Central (Amman, Zarqa, Madaba, Al-Balqaa)	Smoker	Medical	Resident	Private Hospitals/Clinics	Full-Time	<700 JDs	>48	>3	Yes	No	No	Always	Often	Very Often	Often	Often	Very Often	Very Often	Sometimes	Always	Always	Neutral/undecided	Neutral/Undecided	Agree	Neutral/Undecided	Neutral/Undecided
33	Male	Married	1-3 Persons	Rented Falt/House	Central (Amman, Zarqa, Madaba, Al-Balqaa)	Non-smoker	Surgical	Resident	Jordanian Ministry of Health	Full-Time	700-1400 JDs	<40	1-3 on-calls	Yes	No	No	Rarely	Rarely	Sometimes	Sometimes	Sometimes	Sometimes	Sometimes	Sometimes	Often	Rarely	Neutral/undecided	Neutral/Undecided	Agree	Agree	Agree
27	Male	Single	4-6 Persons	Rented Falt/House	Central (Amman, Zarqa, Madaba, Al-Balqaa)	Smoker	Medical	General Practitioner	Private Hospitals/Clinics	Part-Time	<700 JDs	<40	1-3 on-calls	Yes	No	No	Very Often	Sometimes	Rarely	Sometimes	Never	Sometimes	Very Often	Sometimes	Always	Sometimes	Strongly disagree	Neutral/Undecided	Neutral/Undecided	Neutral/Undecided	Agree
29	Male	Single	1-3 Persons	Rented Falt/House	North (Irbid, Ajloun, Jerash, Mafraq)	Non-smoker	Surgical	Resident	University Hospitals	Full-Time	<700 JDs	>48	1-3 on-calls	No	No	Yes	Very Often	Sometimes	Often	Sometimes	Rarely	Often	Sometimes	Rarely	Often	Sometimes	Disagree	Disagree	Neutral/Undecided	Disagree	Neutral/Undecided
26	Female	Single	>6 Persons	Owned Falt/House	Central (Amman, Zarqa, Madaba, Al-Balqaa)	Non-smoker	Medical	General Practitioner	Private Hospitals/Clinics	Full-Time	<700 JDs	40-48	0	No	No	No	Sometimes	Often	Often	Very Often	Sometimes	Very Often	Sometimes	Sometimes	Almost Never	Almost Never	Neutral/undecided	Neutral/Undecided	Agree	Agree	Disagree
29	Female	Married	4-6 Persons	Rented Falt/House	North (Irbid, Ajloun, Jerash, Mafraq)	Non-smoker	Surgical	Resident	Jordanian Royal Medical Services	Full-Time	<700 JDs	40-48	1-3 on-calls	No	No	No	Always	Often	Often	Sometimes	Sometimes	Sometimes	Very Often	Rarely	Often	Often	Neutral/undecided	Disagree	Agree	Disagree	Disagree
35	Male	Single	1-3 Persons	Owned Falt/House	Central (Amman, Zarqa, Madaba, Al-Balqaa)	Smoker	Surgical	Consultant	Private Hospitals/Clinics	Full-Time	>1400 JDs	<40	0	Yes	No	No	Very Often	Often	Never	Very Often	Never	Very Often	Very Often	Never	Rarely	Almost Never	Neutral/undecided	Disagree	Agree	Strongly disagree	Strongly agree
29	Female	Single	1-3 Persons	Rented Falt/House	Central (Amman, Zarqa, Madaba, Al-Balqaa)	Non-smoker	Surgical	Resident	Private Hospitals/Clinics	Full-Time	<700 JDs	>48	1-3 on-calls	No	No	No	Very Often	Very Often	Very Often	Very Often	Very Often	Very Often	Very Often	Never	Often	Very Often	Strongly disagree	Neutral/Undecided	Strongly Agree	Disagree	Agree
29	Female	Married	1-3 Persons	Owned Falt/House	Central (Amman, Zarqa, Madaba, Al-Balqaa)	Non-smoker	Medical	Resident	Jordanian Ministry of Health	Full-Time	700-1400 JDs	40-48	0	No	No	No	Often	Often	Often	Often	Rarely	Often	Rarely	Sometimes	Rarely	Sometimes	Disagree	Neutral/Undecided	Disagree	Neutral/Undecided	Agree
27	Male	Single	>6 Persons	Owned Falt/House	Central (Amman, Zarqa, Madaba, Al-Balqaa)	Smoker	Medical	General Practitioner	Non-Governmental Organizations	Part-Time	<700 JDs	>48	>3	No	No	No	Always	Always	Always	Always	Sometimes	Always	Very Often	Never	Rarely	Always	Strongly disagree	Neutral/Undecided	Strongly Agree	Strongly disagree	Strongly agree
30	Female	Single	4-6 Persons	Owned Falt/House	Central (Amman, Zarqa, Madaba, Al-Balqaa)	Non-smoker	Surgical	Resident	University Hospitals	Full-Time	<700 JDs	40-48	1-3 on-calls	Yes	No	Yes	Often	Rarely	Rarely	Rarely	Rarely	Rarely	Sometimes	Rarely	Sometimes	Rarely	Agree	Agree	Disagree	Agree	Disagree
32	Male	Single	4-6 Persons	Owned Falt/House	Central (Amman, Zarqa, Madaba, Al-Balqaa)	Non-smoker	Medical	Specialist	Private Hospitals/Clinics	Full-Time	>1400 JDs	40-48	1-3 on-calls	Yes	No	No	Sometimes	Sometimes	Rarely	Rarely	Sometimes	Sometimes	Rarely	Sometimes	Rarely	Rarely	Neutral/undecided	Neutral/Undecided	Disagree	Neutral/Undecided	Neutral/Undecided
24	Male	Single	>6 Persons	Owned Falt/House	Central (Amman, Zarqa, Madaba, Al-Balqaa)	Smoker	Surgical	Resident	University Hospitals	Full-Time	<700 JDs	>48	1-3 on-calls	No	No	Yes	Very Often	Sometimes	Sometimes	Sometimes	Sometimes	Very Often	Very Often	Often	Very Often	Often	Neutral/undecided	Neutral/Undecided	Agree	Neutral/Undecided	Disagree
27	Male	Single	>6 Persons	Owned Falt/House	Central (Amman, Zarqa, Madaba, Al-Balqaa)	Non-smoker	Surgical	Resident	University Hospitals	Full-Time	<700 JDs	>48	1-3 on-calls	No	No	No	Always	Very Often	Often	Very Often	Often	Very Often	Very Often	Very Often	Rarely	Often	Agree	Disagree	Disagree	Agree	Agree
27	Female	Single	4-6 Persons	Owned Falt/House	Central (Amman, Zarqa, Madaba, Al-Balqaa)	Non-smoker	Surgical	Resident	Jordanian Royal Medical Services	Full-Time	<700 JDs	40-48	1-3 on-calls	Yes	No	No	Very Often	Very Often	Very Often	Very Often	Very Often	Often	Very Often	Often	Always	Very Often	Neutral/undecided	Neutral/Undecided	Disagree	Agree	Disagree
26	Female	Single	1-3 Persons	Owned Falt/House	Central (Amman, Zarqa, Madaba, Al-Balqaa)	Non-smoker	Surgical	Resident	University Hospitals	Full-Time	<700 JDs	>48	1-3 on-calls	No	No	No	Very Often	Sometimes	Often	Often	Sometimes	Often	Often	Rarely	Rarely	Sometimes	Neutral/undecided	Disagree	Neutral/Undecided	Neutral/Undecided	Neutral/Undecided
25	Male	Single	1-3 Persons	Rented Falt/House	Central (Amman, Zarqa, Madaba, Al-Balqaa)	Non-smoker	Surgical	Resident	University Hospitals	Full-Time	<700 JDs	>48	1-3 on-calls	No	No	No	Very Often	Very Often	Rarely	Rarely	Sometimes	Sometimes	Sometimes	Never	Sometimes	Almost Never	Neutral/undecided	Agree	Disagree	Neutral/Undecided	Disagree
33	Male	Married	1-3 Persons	Owned Falt/House	Central (Amman, Zarqa, Madaba, Al-Balqaa)	Smoker	Medical	Specialist	Jordanian Royal Medical Services	Full-Time	>1400 JDs	40-48	1-3 on-calls	Yes	No	No	Very Often	Very Often	Often	Often	Often	Often	Sometimes	Often	Often	Often	Disagree	Neutral/Undecided	Neutral/Undecided	Disagree	Disagree
26	Male	Single	4-6 Persons	Owned Falt/House	North (Irbid, Ajloun, Jerash, Mafraq)	Non-smoker	Medical	General Practitioner	Private Hospitals/Clinics	Part-Time	<700 JDs	<40	0	No	No	No	Almost Never	Very Often	Often	Sometimes	Sometimes	Very Often	Almost Never	Sometimes	Never	Often	Strongly disagree	Strongly disagree	Neutral/Undecided	Strongly disagree	Agree
35	Female	Married	1-3 Persons	Owned Falt/House	Central (Amman, Zarqa, Madaba, Al-Balqaa)	Smoker	Medical	Resident	Jordanian Ministry of Health	Full-Time	700-1400 JDs	>48	1-3 on-calls	No	No	Yes	Always	Always	Always	Always	Always	Always	Always	Always	Sometimes	Always	Disagree	Disagree	Agree	Strongly disagree	Agree
29	Male	Married	1-3 Persons	Rented Falt/House	Central (Amman, Zarqa, Madaba, Al-Balqaa)	Non-smoker	Surgical	Resident	University Hospitals	Full-Time	<700 JDs	>48	1-3 on-calls	No	No	No	Very Often	Often	Almost Never	Sometimes	Never	Often	Never	Never	Often	Almost Never	Neutral/undecided	Neutral/Undecided	Agree	Neutral/Undecided	Neutral/Undecided
26	Female	Single	1-3 Persons	Rented Falt/House	Central (Amman, Zarqa, Madaba, Al-Balqaa)	Non-smoker	Medical	General Practitioner	Private Hospitals/Clinics	Full-Time	<700 JDs	40-48	0	No	No	Yes	Very Often	Very Often	Very Often	Very Often	Very Often	Very Often	Very Often	Very Often	Very Often	Very Often	Disagree	Neutral/Undecided	Neutral/Undecided	Disagree	Agree
26	Female	Single	4-6 Persons	Owned Falt/House	Central (Amman, Zarqa, Madaba, Al-Balqaa)	Smoker	Medical	Resident	Jordanian Ministry of Health	Full-Time	<700 JDs	40-48	1-3 on-calls	No	No	No	Always	Always	Always	Always	Always	Always	Always	Always	Always	Always	Strongly disagree	Disagree	Strongly Agree	Disagree	Agree
29	Male	Single	1-3 Persons	Rented Falt/House	North (Irbid, Ajloun, Jerash, Mafraq)	Non-smoker	Surgical	Resident	University Hospitals	Full-Time	<700 JDs	>48	1-3 on-calls	No	No	Yes	Very Often	Sometimes	Often	Sometimes	Rarely	Often	Sometimes	Rarely	Often	Sometimes	Disagree	Disagree	Neutral/Undecided	Disagree	Neutral/Undecided
24	Female	Single	>6 Persons	Owned Falt/House	Central (Amman, Zarqa, Madaba, Al-Balqaa)	Non-smoker	Surgical	Resident	University Hospitals	Full-Time	<700 JDs	>48	1-3 on-calls	No	No	No	Sometimes	Rarely	Sometimes	Rarely	Rarely	Rarely	Rarely	Almost Never	Rarely	Rarely	Neutral/undecided	Agree	Neutral/Undecided	Agree	Neutral/Undecided
34	Male	Married	1-3 Persons	Rented Falt/House	Central (Amman, Zarqa, Madaba, Al-Balqaa)	Non-smoker	Surgical	Resident	Jordanian Ministry of Health	Full-Time	700-1400 JDs	>48	1-3 on-calls	No	No	Yes	Sometimes	Often	Sometimes	Sometimes	Sometimes	Sometimes	Sometimes	Rarely	Rarely	Sometimes	Neutral/undecided	Neutral/Undecided	Disagree	Neutral/Undecided	Disagree
31	Female	Single	4-6 Persons	Owned Falt/House	Central (Amman, Zarqa, Madaba, Al-Balqaa)	Non-smoker	Surgical	Specialist	Jordanian Ministry of Health	Full-Time	700-1400 JDs	<40	1-3 on-calls	No	No	No	Sometimes	Very Often	Sometimes	Sometimes	Rarely	Often	Rarely	Rarely	Sometimes	Sometimes	Disagree	Disagree	Neutral/Undecided	Neutral/Undecided	Neutral/Undecided
28	Female	Married	1-3 Persons	Owned Falt/House	Central (Amman, Zarqa, Madaba, Al-Balqaa)	Non-smoker	Medical	Resident	Jordanian Ministry of Health	Full-Time	<700 JDs	<40	1-3 on-calls	No	No	No	Often	Always	Very Often	Very Often	Rarely	Sometimes	Often	Sometimes	Sometimes	Often	Neutral/undecided	Neutral/Undecided	Neutral/Undecided	Disagree	Agree
36	Male	Married	1-3 Persons	Rented Falt/House	Central (Amman, Zarqa, Madaba, Al-Balqaa)	Non-smoker	Surgical	Resident	Jordanian Ministry of Health	Full-Time	700-1400 JDs	>48	>3	Yes	No	No	Always	Very Often	Always	Always	Always	Always	Always	Always	Always	Always	Strongly disagree	Neutral/Undecided	Agree	Agree	Agree
32	Male	Married	1-3 Persons	Rented Falt/House	Central (Amman, Zarqa, Madaba, Al-Balqaa)	Non-smoker	Surgical	Specialist	Private Hospitals/Clinics	Part-Time	700-1400 JDs	<40	0	Yes	No	No	Almost Never	Almost Never	Almost Never	Sometimes	Almost Never	Almost Never	Rarely	Almost Never	Almost Never	Almost Never	Neutral/undecided	Strongly Agree	Strongly disagree	Strongly agree	Strongly disagree
30	Female	Single	>6 Persons	Owned Falt/House	North (Irbid, Ajloun, Jerash, Mafraq)	Non-smoker	Medical	Resident	Jordanian Royal Medical Services	Full-Time	700-1400 JDs	>48	1-3 on-calls	No	No	No	Often	Very Often	Very Often	Very Often	Sometimes	Often	Sometimes	Sometimes	Very Often	Sometimes	Agree	Neutral/Undecided	Neutral/Undecided	Neutral/Undecided	Neutral/Undecided
30	Male	Single	4-6 Persons	Owned Falt/House	Central (Amman, Zarqa, Madaba, Al-Balqaa)	Non-smoker	Surgical	Resident	Jordanian Ministry of Health	Full-Time	700-1400 JDs	>48	1-3 on-calls	No	No	No	Often	Often	Often	Often	Often	Sometimes	Very Often	Often	Sometimes	Often	Neutral/undecided	Neutral/Undecided	Agree	Disagree	Agree
29	Female	Single	4-6 Persons	Owned Falt/House	South (Aqapa, Karak, Maan, Tafileh)	Non-smoker	Surgical	Resident	Jordanian Royal Medical Services	Full-Time	700-1400 JDs	>48	1-3 on-calls	No	No	No	Very Often	Often	Sometimes	Sometimes	Rarely	Sometimes	Sometimes	Rarely	Often	Sometimes	Neutral/undecided	Neutral/Undecided	Neutral/Undecided	Neutral/Undecided	Neutral/Undecided
25	Female	Single	4-6 Persons	Owned Falt/House	North (Irbid, Ajloun, Jerash, Mafraq)	Non-smoker	Medical	General Practitioner	Jordanian Ministry of Health	Part-Time	<700 JDs	40-48	0	No	No	No	Often	Often	Sometimes	Sometimes	Always	Very Often	Sometimes	Often	Often	Sometimes	Agree	Neutral/Undecided	Agree	Agree	Neutral/Undecided
29	Female	Single	4-6 Persons	Owned Falt/House	Central (Amman, Zarqa, Madaba, Al-Balqaa)	Non-smoker	Surgical	Resident	University Hospitals	Full-Time	<700 JDs	40-48	1-3 on-calls	No	No	No	Very Often	Very Often	Sometimes	Sometimes	Rarely	Sometimes	Often	Sometimes	Always	Often	Disagree	Agree	Disagree	Agree	Disagree
31	Female	Single	>6 Persons	Rented Falt/House	Central (Amman, Zarqa, Madaba, Al-Balqaa)	Non-smoker	Surgical	Specialist	Private Hospitals/Clinics	Full-Time	>1400 JDs	<40	1-3 on-calls	Yes	No	No	Often	Very Often	Sometimes	Often	Rarely	Very Often	Rarely	Almost Never	Sometimes	Very Often	Agree	Neutral/Undecided	Disagree	Neutral/Undecided	Neutral/Undecided
27	Male	Single	>6 Persons	Owned Falt/House	Central (Amman, Zarqa, Madaba, Al-Balqaa)	Smoker	Medical	General Practitioner	University Hospitals	Part-Time	<700 JDs	40-48	0	Yes	No	No	Almost Never	Sometimes	Rarely	Almost Never	Almost Never	Rarely	Almost Never	Never	Sometimes	Almost Never	Agree	Neutral/Undecided	Agree	Agree	Neutral/Undecided
28	Male	Single	4-6 Persons	Owned Falt/House	Central (Amman, Zarqa, Madaba, Al-Balqaa)	Smoker	Surgical	Resident	Private Hospitals/Clinics	Full-Time	<700 JDs	>48	1-3 on-calls	No	No	No	Very Often	Very Often	Always	Always	Very Often	Always	Very Often	Very Often	Always	Very Often	Neutral/undecided	Neutral/Undecided	Agree	Disagree	Agree
29	Male	Married	1-3 Persons	Rented Falt/House	Central (Amman, Zarqa, Madaba, Al-Balqaa)	Smoker	Medical	Resident	Private Hospitals/Clinics	Full-Time	<700 JDs	>48	>3	No	No	No	Always	Always	Very Often	Always	Always	Always	Always	Sometimes	Always	Always	Strongly disagree	Neutral/Undecided	Neutral/Undecided	Strongly agree	Neutral/Undecided
36	Male	Married	1-3 Persons	Rented Falt/House	Central (Amman, Zarqa, Madaba, Al-Balqaa)	Non-smoker	Surgical	Resident	Jordanian Ministry of Health	Full-Time	700-1400 JDs	>48	>3	Yes	No	No	Always	Very Often	Always	Always	Always	Always	Always	Always	Always	Always	Strongly disagree	Neutral/Undecided	Agree	Agree	Agree
27	Male	Married	1-3 Persons	Rented Falt/House	North (Irbid, Ajloun, Jerash, Mafraq)	Non-smoker	Surgical	Resident	University Hospitals	Full-Time	<700 JDs	>48	1-3 on-calls	Yes	No	No	Often	Sometimes	Sometimes	Sometimes	Rarely	Rarely	Sometimes	Never	Often	Sometimes	Agree	Agree	Disagree	Agree	Disagree
34	Male	Single	4-6 Persons	Owned Falt/House	Central (Amman, Zarqa, Madaba, Al-Balqaa)	Smoker	Surgical	Resident	Jordanian Ministry of Health	Full-Time	700-1400 JDs	>48	1-3 on-calls	No	No	No	Very Often	Sometimes	Rarely	Often	Almost Never	Sometimes	Rarely	Rarely	Often	Sometimes	Agree	Agree	Disagree	Agree	Disagree
39	Male	Married	1-3 Persons	Owned Falt/House	Central (Amman, Zarqa, Madaba, Al-Balqaa)	Non-smoker	Medical	General Practitioner	Private Hospitals/Clinics	Full-Time	<700 JDs	40-48	1-3 on-calls	Yes	No	No	Sometimes	Always	Rarely	Rarely	Never	Sometimes	Sometimes	Rarely	Sometimes	Rarely	Neutral/undecided	Agree	Agree	Agree	Neutral/Undecided
25	Male	Single	1-3 Persons	Rented Falt/House	Central (Amman, Zarqa, Madaba, Al-Balqaa)	Smoker	Medical	General Practitioner	Jordanian Ministry of Health	Part-Time	<700 JDs	<40	0	No	No	No	Sometimes	Very Often	Very Often	Often	Sometimes	Often	Sometimes	Often	Rarely	Rarely	Disagree	Disagree	Neutral/Undecided	Disagree	Agree
26	Male	Single	4-6 Persons	Owned Falt/House	Central (Amman, Zarqa, Madaba, Al-Balqaa)	Smoker	Medical	General Practitioner	Non-Governmental Organizations	Part-Time	<700 JDs	<40	>3	Yes	Yes	No	Sometimes	Never	Always	Never	Never	Never	Rarely	Never	Always	Rarely	Neutral/undecided	Neutral/Undecided	Disagree	Strongly agree	Strongly agree
60	Male	Married	4-6 Persons	Owned Falt/House	Central (Amman, Zarqa, Madaba, Al-Balqaa)	Non-smoker	Medical	Specialist	Jordanian Ministry of Health	Full-Time	>1400 JDs	>48	1-3 on-calls	Yes	No	No	Very Often	Often	Rarely	Rarely	Never	Never	Rarely	Never	Rarely	Rarely	Strongly Agree	Strongly Agree	Strongly Agree	Strongly agree	Strongly disagree
27	Female	Single	4-6 Persons	Owned Falt/House	North (Irbid, Ajloun, Jerash, Mafraq)	Non-smoker	Surgical	Resident	Jordanian Royal Medical Services	Full-Time	700-1400 JDs	>48	1-3 on-calls	No	No	Yes	Very Often	Always	Sometimes	Often	Often	Often	Always	Sometimes	Very Often	Very Often	Disagree	Neutral/Undecided	Neutral/Undecided	Disagree	Neutral/Undecided
25	Male	Single	4-6 Persons	Owned Falt/House	North (Irbid, Ajloun, Jerash, Mafraq)	Non-smoker	Medical	General Practitioner	Jordanian Ministry of Health	Full-Time	<700 JDs	40-48	1-3 on-calls	No	No	No	Sometimes	Often	Almost Never	Rarely	Almost Never	Almost Never	Never	Never	Rarely	Almost Never	Strongly disagree	Neutral/Undecided	Disagree	Neutral/Undecided	Disagree
26	Female	Single	>6 Persons	Owned Falt/House	Central (Amman, Zarqa, Madaba, Al-Balqaa)	Non-smoker	Medical	General Practitioner	Private Hospitals/Clinics	Full-Time	<700 JDs	40-48	1-3 on-calls	Yes	No	Yes	Very Often	Very Often	Often	Always	Always	Sometimes	Sometimes	Sometimes	Very Often	Sometimes	Strongly disagree	Neutral/Undecided	Agree	Disagree	Strongly agree
26	Male	Single	4-6 Persons	Owned Falt/House	Central (Amman, Zarqa, Madaba, Al-Balqaa)	Smoker	Medical	General Practitioner	Non-Governmental Organizations	Part-Time	<700 JDs	<40	0	Yes	No	No	Always	Very Often	Sometimes	Always	Rarely	Very Often	Very Often	Almost Never	Often	Very Often	Strongly disagree	Neutral/Undecided	Neutral/Undecided	Disagree	Agree
27	Male	Single	1-3 Persons	Rented Falt/House	Central (Amman, Zarqa, Madaba, Al-Balqaa)	Smoker	Medical	General Practitioner	Private Hospitals/Clinics	Full-Time	<700 JDs	>48	>3	No	No	No	Very Often	Often	Sometimes	Often	Sometimes	Sometimes	Often	Sometimes	Very Often	Often	Strongly disagree	Strongly disagree	Agree	Disagree	Agree
28	Female	Married	1-3 Persons	Owned Falt/House	Central (Amman, Zarqa, Madaba, Al-Balqaa)	Non-smoker	Medical	Resident	Jordanian Royal Medical Services	Full-Time	700-1400 JDs	40-48	0	No	No	No	Sometimes	Often	Sometimes	Sometimes	Sometimes	Sometimes	Sometimes	Never	Sometimes	Almost Never	Agree	Neutral/Undecided	Disagree	Neutral/Undecided	Disagree
24	Female	Single	>6 Persons	Owned Falt/House	Central (Amman, Zarqa, Madaba, Al-Balqaa)	Non-smoker	Surgical	Resident	University Hospitals	Full-Time	<700 JDs	>48	1-3 on-calls	No	No	No	Sometimes	Rarely	Sometimes	Rarely	Rarely	Rarely	Rarely	Almost Never	Rarely	Rarely	Neutral/undecided	Agree	Neutral/Undecided	Agree	Neutral/Undecided
27	Male	Single	1-3 Persons	Owned Falt/House	Central (Amman, Zarqa, Madaba, Al-Balqaa)	Smoker	Medical	Resident	Private Hospitals/Clinics	Full-Time	<700 JDs	>48	1-3 on-calls	Yes	No	No	Often	Rarely	Almost Never	Often	Never	Sometimes	Often	Often	Often	Often	Agree	Neutral/Undecided	Neutral/Undecided	Disagree	Neutral/Undecided
29	Female	Married	1-3 Persons	Owned Falt/House	North (Irbid, Ajloun, Jerash, Mafraq)	Non-smoker	Medical	Resident	Jordanian Ministry of Health	Full-Time	<700 JDs	<40	0	No	No	No	Very Often	Very Often	Very Often	Very Often	Often	Sometimes	Sometimes	Sometimes	Sometimes	Sometimes	Neutral/undecided	Neutral/Undecided	Neutral/Undecided	Neutral/Undecided	Disagree
27	Male	Single	4-6 Persons	Owned Falt/House	Central (Amman, Zarqa, Madaba, Al-Balqaa)	Non-smoker	Medical	General Practitioner	Private Hospitals/Clinics	Part-Time	<700 JDs	40-48	0	Yes	No	No	Often	Almost Never	Rarely	Sometimes	Sometimes	Rarely	Rarely	Sometimes	Never	Rarely	Agree	Agree	Neutral/Undecided	Agree	Disagree
27	Female	Single	4-6 Persons	Owned Falt/House	North (Irbid, Ajloun, Jerash, Mafraq)	Non-smoker	Medical	General Practitioner	Private Hospitals/Clinics	Full-Time	<700 JDs	40-48	1-3 on-calls	Yes	No	No	Often	Often	Often	Sometimes	Rarely	Sometimes	Often	Rarely	Sometimes	Sometimes	Strongly Agree	Neutral/Undecided	Agree	Agree	Neutral/Undecided
55	Male	Married	4-6 Persons	Owned Falt/House	Central (Amman, Zarqa, Madaba, Al-Balqaa)	Non-smoker	Medical	Consultant	Private Hospitals/Clinics	Full-Time	>1400 JDs	>48	>3	Yes	No	Yes	Sometimes	Sometimes	Sometimes	Sometimes	Sometimes	Sometimes	Sometimes	Sometimes	Rarely	Rarely	Neutral/undecided	Neutral/Undecided	Neutral/Undecided	Neutral/Undecided	Neutral/Undecided
30	Male	Single	>6 Persons	Owned Falt/House	Central (Amman, Zarqa, Madaba, Al-Balqaa)	Smoker	Medical	General Practitioner	Private Hospitals/Clinics	Full-Time	<700 JDs	40-48	1-3 on-calls	No	No	No	Often	Often	Rarely	Often	Sometimes	Often	Often	Rarely	Very Often	Very Often	Disagree	Disagree	Agree	Disagree	Agree
26	Male	Single	4-6 Persons	Owned Falt/House	South (Aqapa, Karak, Maan, Tafileh)	Smoker	Medical	General Practitioner	Jordanian Ministry of Health	Part-Time	<700 JDs	40-48	1-3 on-calls	No	No	Yes	Very Often	Rarely	Often	Sometimes	Sometimes	Often	Sometimes	Sometimes	Sometimes	Sometimes	Strongly Agree	Neutral/Undecided	Neutral/Undecided	Strongly disagree	Neutral/Undecided
30	Female	Married	1-3 Persons	Owned Falt/House	Central (Amman, Zarqa, Madaba, Al-Balqaa)	Non-smoker	Medical	Resident	Jordanian Ministry of Health	Full-Time	<700 JDs	<40	0	Yes	No	No	Sometimes	Rarely	Sometimes	Very Often	Sometimes	Very Often	Sometimes	Often	Never	Almost Never	Neutral/undecided	Agree	Agree	Neutral/Undecided	Neutral/Undecided
33	Male	Single	1-3 Persons	Owned Falt/House	Central (Amman, Zarqa, Madaba, Al-Balqaa)	Smoker	Medical	General Practitioner	Non-Governmental Organizations	Full-Time	<700 JDs	40-48	0	Yes	No	No	Often	Very Often	Always	Always	Sometimes	Always	Very Often	Always	Sometimes	Always	Disagree	Agree	Neutral/Undecided	Disagree	Agree
34	Male	Single	1-3 Persons	Owned Falt/House	Central (Amman, Zarqa, Madaba, Al-Balqaa)	Smoker	Surgical	Resident	Jordanian Ministry of Health	Full-Time	<700 JDs	>48	>3	Yes	No	No	Sometimes	Sometimes	Often	Rarely	Rarely	Rarely	Almost Never	Never	Rarely	Never	Strongly Agree	Agree	Agree	Strongly agree	Disagree
28	Female	Single	>6 Persons	Owned Falt/House	Central (Amman, Zarqa, Madaba, Al-Balqaa)	Non-smoker	Medical	Resident	Non-Governmental Organizations	Full-Time	700-1400 JDs	40-48	0	Yes	No	No	Sometimes	Often	Sometimes	Sometimes	Almost Never	Sometimes	Sometimes	Rarely	Sometimes	Sometimes	Agree	Agree	Disagree	Neutral/Undecided	Disagree
32	Female	Married	1-3 Persons	Owned Falt/House	Central (Amman, Zarqa, Madaba, Al-Balqaa)	Non-smoker	Medical	Specialist	Jordanian Ministry of Health	Full-Time	700-1400 JDs	40-48	0	Yes	No	No	Sometimes	Often	Often	Often	Sometimes	Sometimes	Rarely	Sometimes	Almost Never	Rarely	Neutral/undecided	Neutral/Undecided	Neutral/Undecided	Neutral/Undecided	Neutral/Undecided
25	Male	Single	1-3 Persons	Owned Falt/House	North (Irbid, Ajloun, Jerash, Mafraq)	Smoker	Surgical	Resident	Private Hospitals/Clinics	Full-Time	700-1400 JDs	>48	1-3 on-calls	Yes	Yes	No	Very Often	Rarely	Rarely	Rarely	Almost Never	Almost Never	Often	Rarely	Very Often	Almost Never	Neutral/undecided	Neutral/Undecided	Neutral/Undecided	Agree	Disagree
30	Female	Married	1-3 Persons	Owned Falt/House	Central (Amman, Zarqa, Madaba, Al-Balqaa)	Non-smoker	Surgical	Resident	Private Hospitals/Clinics	Full-Time	<700 JDs	>48	>3	Yes	No	No	Always	Always	Always	Always	Always	Always	Always	Always	Always	Always	Neutral/undecided	Neutral/Undecided	Neutral/Undecided	Neutral/Undecided	Strongly agree
27	Female	Single	4-6 Persons	Owned Falt/House	North (Irbid, Ajloun, Jerash, Mafraq)	Non-smoker	Surgical	Resident	Jordanian Royal Medical Services	Full-Time	700-1400 JDs	>48	1-3 on-calls	No	No	Yes	Very Often	Always	Sometimes	Often	Often	Often	Always	Sometimes	Very Often	Very Often	Disagree	Neutral/Undecided	Neutral/Undecided	Disagree	Neutral/Undecided
27	Male	Married	>6 Persons	Owned Falt/House	North (Irbid, Ajloun, Jerash, Mafraq)	Smoker	Medical	General Practitioner	Jordanian Ministry of Health	Part-Time	<700 JDs	<40	0	Yes	No	No	Rarely	Rarely	Rarely	Always	Sometimes	Sometimes	Almost Never	Never	Rarely	Rarely	Disagree	Neutral/Undecided	Strongly disagree	Strongly agree	Neutral/Undecided
24	Female	Single	4-6 Persons	Owned Falt/House	Central (Amman, Zarqa, Madaba, Al-Balqaa)	Non-smoker	Medical	General Practitioner	Non-Governmental Organizations	Full-Time	<700 JDs	40-48	0	No	No	No	Sometimes	Sometimes	Sometimes	Sometimes	Sometimes	Sometimes	Sometimes	Sometimes	Often	Sometimes	Neutral/undecided	Neutral/Undecided	Neutral/Undecided	Neutral/Undecided	Neutral/Undecided
26	Male	Single	4-6 Persons	Rented Falt/House	North (Irbid, Ajloun, Jerash, Mafraq)	Non-smoker	Medical	General Practitioner	Jordanian Ministry of Health	Part-Time	<700 JDs	40-48	0	No	No	No	Always	Sometimes	Often	Often	Always	Sometimes	Often	Sometimes	Often	Sometimes	Neutral/undecided	Neutral/Undecided	Agree	Neutral/Undecided	Neutral/Undecided
43	Male	Married	4-6 Persons	Owned Falt/House	South (Aqapa, Karak, Maan, Tafileh)	Non-smoker	Medical	Specialist	Private Hospitals/Clinics	Full-Time	>1400 JDs	40-48	>3	Yes	No	Yes	Always	Rarely	Never	Never	Always	Rarely	Sometimes	Almost Never	Sometimes	Sometimes	Strongly Agree	Agree	Agree	Strongly agree	Disagree
28	Female	Married	1-3 Persons	Rented Falt/House	Central (Amman, Zarqa, Madaba, Al-Balqaa)	Non-smoker	Medical	General Practitioner	Jordanian Royal Medical Services	Full-Time	700-1400 JDs	<40	0	No	No	Yes	Very Often	Very Often	Often	Very Often	Very Often	Often	Sometimes	Sometimes	Often	Always	Strongly disagree	Neutral/Undecided	Strongly disagree	Neutral/Undecided	Agree
29	Female	Single	4-6 Persons	Owned Falt/House	Central (Amman, Zarqa, Madaba, Al-Balqaa)	Non-smoker	Surgical	Resident	University Hospitals	Full-Time	<700 JDs	40-48	1-3 on-calls	No	No	No	Very Often	Very Often	Sometimes	Sometimes	Rarely	Sometimes	Often	Sometimes	Always	Often	Disagree	Agree	Disagree	Agree	Disagree
25	Female	Single	4-6 Persons	Owned Falt/House	Central (Amman, Zarqa, Madaba, Al-Balqaa)	Smoker	Medical	General Practitioner	Private Hospitals/Clinics	Part-Time	<700 JDs	<40	0	No	No	No	Very Often	Always	Always	Very Often	Often	Always	Often	Always	Always	Always	Disagree	Neutral/Undecided	Agree	Neutral/Undecided	Agree
27	Male	Single	4-6 Persons	Owned Falt/House	Central (Amman, Zarqa, Madaba, Al-Balqaa)	Smoker	Medical	General Practitioner	Jordanian Ministry of Health	Part-Time	<700 JDs	40-48	0	Yes	No	No	Sometimes	Very Often	Very Often	Very Often	Almost Never	Always	Sometimes	Sometimes	Often	Sometimes	Neutral/undecided	Agree	Agree	Disagree	Agree
38	Male	Married	>6 Persons	Owned Falt/House	Central (Amman, Zarqa, Madaba, Al-Balqaa)	Smoker	Surgical	Resident	Jordanian Ministry of Health	Full-Time	700-1400 JDs	>48	1-3 on-calls	No	No	No	Very Often	Always	Very Often	Very Often	Very Often	Very Often	Very Often	Rarely	Very Often	Very Often	Disagree	Neutral/Undecided	Agree	Neutral/Undecided	Neutral/Undecided
30	Male	Single	4-6 Persons	Owned Falt/House	Central (Amman, Zarqa, Madaba, Al-Balqaa)	Smoker	Surgical	Resident	Jordanian Ministry of Health	Full-Time	<700 JDs	40-48	1-3 on-calls	No	No	No	Sometimes	Very Often	Rarely	Rarely	Almost Never	Almost Never	Sometimes	Never	Sometimes	Rarely	Agree	Neutral/Undecided	Neutral/Undecided	Agree	Disagree
30	Male	Married	1-3 Persons	Rented Falt/House	Central (Amman, Zarqa, Madaba, Al-Balqaa)	Smoker	Surgical	Resident	Jordanian Royal Medical Services	Full-Time	<700 JDs	>48	1-3 on-calls	No	No	No	Always	Very Often	Sometimes	Often	Sometimes	Sometimes	Sometimes	Rarely	Sometimes	Rarely	Agree	Neutral/Undecided	Strongly Agree	Agree	Strongly disagree
27	Female	Single	>6 Persons	Owned Falt/House	South (Aqapa, Karak, Maan, Tafileh)	Non-smoker	Medical	General Practitioner	Jordanian Ministry of Health	Full-Time	<700 JDs	40-48	0	No	No	No	Often	Always	Always	Often	Almost Never	Very Often	Sometimes	Sometimes	Almost Never	Often	Neutral/undecided	Neutral/Undecided	Agree	Neutral/Undecided	Agree
30	Male	Single	4-6 Persons	Owned Falt/House	Central (Amman, Zarqa, Madaba, Al-Balqaa)	Smoker	Surgical	Resident	Jordanian Ministry of Health	Full-Time	<700 JDs	40-48	1-3 on-calls	No	No	No	Sometimes	Very Often	Rarely	Rarely	Almost Never	Almost Never	Sometimes	Never	Sometimes	Rarely	Agree	Neutral/Undecided	Neutral/Undecided	Agree	Disagree
36	Male	Married	1-3 Persons	Rented Falt/House	Central (Amman, Zarqa, Madaba, Al-Balqaa)	Non-smoker	Surgical	Resident	Jordanian Ministry of Health	Full-Time	700-1400 JDs	>48	>3	Yes	No	No	Always	Very Often	Always	Always	Always	Always	Always	Always	Always	Always	Strongly disagree	Neutral/Undecided	Agree	Agree	Agree
28	Male	Single	4-6 Persons	Owned Falt/House	South (Aqapa, Karak, Maan, Tafileh)	Smoker	Medical	General Practitioner	Jordanian Ministry of Health	Full-Time	<700 JDs	>48	1-3 on-calls	Yes	No	Yes	Very Often	Sometimes	Always	Always	Rarely	Always	Very Often	Sometimes	Often	Sometimes	Strongly disagree	Strongly disagree	Strongly Agree	Strongly disagree	Strongly agree
32	Male	Married	1-3 Persons	Rented Falt/House	North (Irbid, Ajloun, Jerash, Mafraq)	Smoker	Medical	Resident	Jordanian Ministry of Health	Full-Time	700-1400 JDs	<40	0	Yes	No	No	Sometimes	Sometimes	Rarely	Rarely	Never	Never	Rarely	Rarely	Very Often	Rarely	Neutral/undecided	Neutral/Undecided	Neutral/Undecided	Neutral/Undecided	Neutral/Undecided
31	Female	Married	4-6 Persons	Rented Falt/House	Central (Amman, Zarqa, Madaba, Al-Balqaa)	Non-smoker	Surgical	Specialist	Private Hospitals/Clinics	Full-Time	>1400 JDs	40-48	0	Yes	No	Yes	Often	Sometimes	Sometimes	Rarely	Rarely	Rarely	Rarely	Rarely	Rarely	Rarely	Agree	Agree	Agree	Agree	Disagree
27	Female	Married	1-3 Persons	Owned Falt/House	Central (Amman, Zarqa, Madaba, Al-Balqaa)	Non-smoker	Surgical	Specialist	Private Hospitals/Clinics	Full-Time	<700 JDs	40-48	1-3 on-calls	Yes	No	No	Very Often	Sometimes	Sometimes	Rarely	Always	Rarely	Very Often	Sometimes	Often	Sometimes	Agree	Disagree	Agree	Strongly agree	Strongly agree
31	Male	Single	1-3 Persons	Owned Falt/House	Central (Amman, Zarqa, Madaba, Al-Balqaa)	Non-smoker	Medical	Specialist	Non-Governmental Organizations	Full-Time	>1400 JDs	40-48	>3	Yes	No	Yes	Rarely	Sometimes	Sometimes	Often	Rarely	Almost Never	Often	Almost Never	Very Often	Sometimes	Neutral/undecided	Neutral/Undecided	Disagree	Agree	Disagree
28	Male	Single	>6 Persons	Rented Falt/House	Central (Amman, Zarqa, Madaba, Al-Balqaa)	Smoker	Medical	General Practitioner	Private Hospitals/Clinics	Full-Time	<700 JDs	>48	>3	No	No	No	Sometimes	Sometimes	Sometimes	Sometimes	Sometimes	Sometimes	Sometimes	Sometimes	Sometimes	Rarely	Neutral/undecided	Neutral/Undecided	Disagree	Neutral/Undecided	Neutral/Undecided
25	Male	Single	4-6 Persons	Owned Falt/House	Central (Amman, Zarqa, Madaba, Al-Balqaa)	Non-smoker	Surgical	Resident	Private Hospitals/Clinics	Full-Time	<700 JDs	>48	1-3 on-calls	Yes	No	No	Often	Sometimes	Rarely	Sometimes	Sometimes	Sometimes	Sometimes	Rarely	Often	Rarely	Neutral/undecided	Neutral/Undecided	Neutral/Undecided	Neutral/Undecided	Disagree
27	Male	Single	4-6 Persons	Owned Falt/House	Central (Amman, Zarqa, Madaba, Al-Balqaa)	Non-smoker	Medical	Resident	Jordanian Ministry of Health	Full-Time	<700 JDs	40-48	1-3 on-calls	No	No	Yes	Often	Always	Always	Always	Always	Always	Very Often	Always	Always	Very Often	Disagree	Disagree	Neutral/Undecided	Disagree	Agree
27	Male	Single	4-6 Persons	Owned Falt/House	Central (Amman, Zarqa, Madaba, Al-Balqaa)	Non-smoker	Medical	Resident	Jordanian Ministry of Health	Full-Time	<700 JDs	40-48	1-3 on-calls	No	No	Yes	Often	Always	Always	Always	Always	Always	Very Often	Always	Always	Very Often	Disagree	Disagree	Neutral/Undecided	Disagree	Agree
26	Male	Single	4-6 Persons	Owned Falt/House	Central (Amman, Zarqa, Madaba, Al-Balqaa)	Smoker	Medical	General Practitioner	Private Hospitals/Clinics	Part-Time	<700 JDs	40-48	1-3 on-calls	No	No	Yes	Always	Always	Always	Always	Rarely	Always	Always	Rarely	Rarely	Often	Strongly disagree	Neutral/Undecided	Neutral/Undecided	Strongly disagree	Agree
28	Male	Single	4-6 Persons	Owned Falt/House	Central (Amman, Zarqa, Madaba, Al-Balqaa)	Non-smoker	Medical	General Practitioner	Non-Governmental Organizations	Part-Time	<700 JDs	<40	0	Yes	No	No	Sometimes	Sometimes	Rarely	Sometimes	Almost Never	Often	Often	Rarely	Rarely	Rarely	Neutral/undecided	Neutral/Undecided	Neutral/Undecided	Neutral/Undecided	Neutral/Undecided
43	Male	Married	4-6 Persons	Owned Falt/House	South (Aqapa, Karak, Maan, Tafileh)	Non-smoker	Medical	Specialist	Private Hospitals/Clinics	Full-Time	>1400 JDs	40-48	>3	Yes	No	Yes	Always	Rarely	Never	Never	Always	Rarely	Sometimes	Almost Never	Sometimes	Sometimes	Strongly Agree	Agree	Agree	Strongly agree	Disagree
24	Male	Single	4-6 Persons	Owned Falt/House	Central (Amman, Zarqa, Madaba, Al-Balqaa)	Non-smoker	Medical	General Practitioner	Jordanian Ministry of Health	Part-Time	<700 JDs	<40	0	Yes	No	No	Sometimes	Sometimes	Sometimes	Rarely	Almost Never	Sometimes	Almost Never	Never	Sometimes	Rarely	Neutral/undecided	Strongly disagree	Neutral/Undecided	Strongly disagree	Strongly disagree
37	Female	Married	4-6 Persons	Rented Falt/House	North (Irbid, Ajloun, Jerash, Mafraq)	Non-smoker	Surgical	Consultant	Private Hospitals/Clinics	Full-Time	>1400 JDs	40-48	1-3 on-calls	Yes	No	No	Sometimes	Sometimes	Sometimes	Sometimes	Sometimes	Rarely	Often	Rarely	Rarely	Rarely	Agree	Agree	Disagree	Agree	Disagree
36	Male	Married	1-3 Persons	Owned Falt/House	North (Irbid, Ajloun, Jerash, Mafraq)	Non-smoker	Medical	Consultant	Jordanian Ministry of Health	Part-Time	700-1400 JDs	<40	0	No	No	No	Rarely	Almost Never	Rarely	Rarely	Rarely	Almost Never	Almost Never	Rarely	Almost Never	Almost Never	Agree	Agree	Disagree	Agree	Disagree
40	Female	Married	>6 Persons	Rented Falt/House	Central (Amman, Zarqa, Madaba, Al-Balqaa)	Non-smoker	Surgical	Consultant	Private Hospitals/Clinics	Full-Time	>1400 JDs	<40	0	No	No	No	Sometimes	Sometimes	Sometimes	Sometimes	Sometimes	Sometimes	Sometimes	Sometimes	Sometimes	Sometimes	Neutral/undecided	Neutral/Undecided	Neutral/Undecided	Agree	Neutral/Undecided
46	Male	Married	1-3 Persons	Rented Falt/House	Central (Amman, Zarqa, Madaba, Al-Balqaa)	Non-smoker	Medical	Consultant	Private Hospitals/Clinics	Full-Time	>1400 JDs	>48	0	Yes	No	No	Often	Very Often	Rarely	Rarely	Never	Never	Rarely	Never	Sometimes	Never	Agree	Agree	Strongly disagree	Strongly agree	Strongly disagree
43	Male	Married	4-6 Persons	Owned Falt/House	Central (Amman, Zarqa, Madaba, Al-Balqaa)	Non-smoker	Surgical	Consultant	Private Hospitals/Clinics	Full-Time	>1400 JDs	40-48	0	Yes	No	No	Rarely	Sometimes	Sometimes	Sometimes	Rarely	Rarely	Rarely	Rarely	Rarely	Sometimes	Agree	Agree	Disagree	Agree	Disagree
34	Male	Married	1-3 Persons	Rented Falt/House	North (Irbid, Ajloun, Jerash, Mafraq)	Smoker	Surgical	Specialist	Private Hospitals/Clinics	Part-Time	>1400 JDs	<40	0	No	No	No	Often	Sometimes	Sometimes	Sometimes	Sometimes	Often	Very Often	Rarely	Sometimes	Sometimes	Neutral/undecided	Agree	Neutral/Undecided	Neutral/Undecided	Neutral/Undecided
37	Female	Married	4-6 Persons	Owned Falt/House	Central (Amman, Zarqa, Madaba, Al-Balqaa)	Non-smoker	Medical	Consultant	University Hospitals	Part-Time	>1400 JDs	40-48	0	Yes	No	No	Sometimes	Often	Sometimes	Sometimes	Almost Never	Sometimes	Rarely	Never	Very Often	Sometimes	Neutral/undecided	Neutral/Undecided	Neutral/Undecided	Agree	Disagree
37	Female	Married	4-6 Persons	Owned Falt/House	North (Irbid, Ajloun, Jerash, Mafraq)	Non-smoker	Surgical	Consultant	Private Hospitals/Clinics	Full-Time	>1400 JDs	<40	0	Yes	No	No	Often	Always	Often	Very Often	Sometimes	Very Often	Very Often	Often	Often	Often	Neutral/undecided	Neutral/Undecided	Agree	Disagree	Agree
29	Female	Single	>6 Persons	Rented Falt/House	Central (Amman, Zarqa, Madaba, Al-Balqaa)	Non-smoker	Medical	Resident	University Hospitals	Full-Time	<700 JDs	>48	>3	No	No	No	Often	Sometimes	Sometimes	Often	Sometimes	Rarely	Very Often	Sometimes	Very Often	Often	Neutral/undecided	Neutral/Undecided	Agree	Neutral/Undecided	Neutral/Undecided
43	Male	Married	4-6 Persons	Owned Falt/House	Central (Amman, Zarqa, Madaba, Al-Balqaa)	Non-smoker	Surgical	Consultant	Private Hospitals/Clinics	Full-Time	>1400 JDs	40-48	0	Yes	No	No	Rarely	Sometimes	Sometimes	Sometimes	Rarely	Rarely	Rarely	Rarely	Rarely	Sometimes	Agree	Agree	Disagree	Agree	Disagree
33	Male	Single	1-3 Persons	Owned Falt/House	Central (Amman, Zarqa, Madaba, Al-Balqaa)	Non-smoker	Medical	Resident	Jordanian Ministry of Health	Full-Time	700-1400 JDs	>48	1-3 on-calls	No	No	No	Sometimes	Very Often	Sometimes	Sometimes	Often	Rarely	Rarely	Rarely	Almost Never	Rarely	Disagree	Disagree	Disagree	Disagree	Neutral/Undecided
52	Male	Single	1-3 Persons	Owned Falt/House	Central (Amman, Zarqa, Madaba, Al-Balqaa)	Smoker	Medical	Specialist	Jordanian Ministry of Health	Full-Time	>1400 JDs	>48	>3	Yes	No	Yes	Very Often	Often	Rarely	Often	Rarely	Sometimes	Sometimes	Sometimes	Sometimes	Sometimes	Agree	Agree	Agree	Agree	Disagree
29	Male	Married	1-3 Persons	Rented Falt/House	South (Aqapa, Karak, Maan, Tafileh)	Non-smoker	Medical	General Practitioner	Private Hospitals/Clinics	Full-Time	<700 JDs	40-48	1-3 on-calls	No	No	No	Always	Very Often	Very Often	Often	Sometimes	Sometimes	Sometimes	Rarely	Very Often	Sometimes	Disagree	Neutral/Undecided	Neutral/Undecided	Neutral/Undecided	Agree
32	Male	Married	1-3 Persons	Rented Falt/House	Central (Amman, Zarqa, Madaba, Al-Balqaa)	Smoker	Medical	Specialist	Private Hospitals/Clinics	Full-Time	>1400 JDs	<40	1-3 on-calls	Yes	No	No	Often	Very Often	Often	Sometimes	Often	Often	Sometimes	Almost Never	Very Often	Rarely	Agree	Agree	Disagree	Neutral/Undecided	Disagree
37	Male	Married	4-6 Persons	Owned Falt/House	North (Irbid, Ajloun, Jerash, Mafraq)	Non-smoker	Medical	Consultant	Jordanian Ministry of Health	Part-Time	>1400 JDs	<40	0	No	No	No	Rarely	Sometimes	Never	Rarely	Almost Never	Almost Never	Almost Never	Never	Rarely	Almost Never	Neutral/undecided	Neutral/Undecided	Disagree	Disagree	Neutral/Undecided
41	Female	Married	1-3 Persons	Owned Falt/House	Central (Amman, Zarqa, Madaba, Al-Balqaa)	Non-smoker	Medical	Specialist	Jordanian Ministry of Health	Full-Time	700-1400 JDs	40-48	0	No	No	No	Almost Never	Sometimes	Rarely	Rarely	Sometimes	Never	Never	Never	Never	Almost Never	Agree	Agree	Disagree	Neutral/Undecided	Disagree
28	Female	Single	4-6 Persons	Owned Falt/House	Central (Amman, Zarqa, Madaba, Al-Balqaa)	Non-smoker	Medical	Resident	Jordanian Ministry of Health	Full-Time	700-1400 JDs	>48	1-3 on-calls	No	No	Yes	Always	Always	Very Often	Very Often	Very Often	Very Often	Very Often	Rarely	Sometimes	Often	Neutral/undecided	Neutral/Undecided	Disagree	Disagree	Disagree
42	Male	Married	4-6 Persons	Rented Falt/House	Central (Amman, Zarqa, Madaba, Al-Balqaa)	Smoker	Medical	Specialist	Jordanian Ministry of Health	Full-Time	700-1400 JDs	>48	>3	Yes	No	No	Very Often	Often	Sometimes	Often	Rarely	Sometimes	Rarely	Sometimes	Sometimes	Sometimes	Agree	Agree	Agree	Neutral/Undecided	Neutral/Undecided
37	Female	Married	4-6 Persons	Owned Falt/House	Central (Amman, Zarqa, Madaba, Al-Balqaa)	Non-smoker	Medical	Consultant	University Hospitals	Part-Time	>1400 JDs	40-48	0	Yes	No	No	Sometimes	Often	Sometimes	Sometimes	Almost Never	Sometimes	Rarely	Never	Very Often	Sometimes	Neutral/undecided	Neutral/Undecided	Neutral/Undecided	Agree	Disagree
35	Male	Married	4-6 Persons	Owned Falt/House	Central (Amman, Zarqa, Madaba, Al-Balqaa)	Smoker	Medical	General Practitioner	Jordanian Ministry of Health	Full-Time	<700 JDs	>48	0	Yes	No	No	Sometimes	Sometimes	Rarely	Almost Never	Almost Never	Sometimes	Rarely	Never	Rarely	Sometimes	Agree	Disagree	Disagree	Agree	Strongly agree
29	Male	Single	>6 Persons	Owned Falt/House	Central (Amman, Zarqa, Madaba, Al-Balqaa)	Smoker	Medical	General Practitioner	Non-Governmental Organizations	Part-Time	<700 JDs	40-48	1-3 on-calls	Yes	No	No	Sometimes	Sometimes	Sometimes	Sometimes	Often	Very Often	Often	Sometimes	Sometimes	Sometimes	Strongly disagree	Disagree	Neutral/Undecided	Disagree	Disagree
34	Male	Married	4-6 Persons	Owned Falt/House	Central (Amman, Zarqa, Madaba, Al-Balqaa)	Non-smoker	Medical	General Practitioner	Jordanian Ministry of Health	Full-Time	<700 JDs	40-48	0	No	No	Yes	Often	Always	Always	Always	Sometimes	Very Often	Often	Rarely	Very Often	Always	Neutral/undecided	Neutral/Undecided	Agree	Strongly disagree	Agree
26	Male	Single	4-6 Persons	Owned Falt/House	Central (Amman, Zarqa, Madaba, Al-Balqaa)	Non-smoker	Medical	Resident	University Hospitals	Full-Time	<700 JDs	>48	1-3 on-calls	Yes	No	No	Always	Very Often	Often	Always	Sometimes	Always	Always	Very Often	Often	Always	Disagree	Neutral/Undecided	Strongly Agree	Agree	Agree
39	Male	Married	1-3 Persons	Rented Falt/House	Central (Amman, Zarqa, Madaba, Al-Balqaa)	Non-smoker	Medical	Specialist	Jordanian Royal Medical Services	Full-Time	700-1400 JDs	>48	>3	No	No	No	Very Often	Very Often	Always	Very Often	Very Often	Often	Very Often	Very Often	Very Often	Very Often	Disagree	Disagree	Neutral/Undecided	Disagree	Agree
31	Male	Married	1-3 Persons	Owned Falt/House	North (Irbid, Ajloun, Jerash, Mafraq)	Non-smoker	Medical	Resident	Jordanian Ministry of Health	Full-Time	700-1400 JDs	<40	1-3 on-calls	No	No	No	Often	Very Often	Often	Sometimes	Sometimes	Very Often	Very Often	Rarely	Rarely	Rarely	Neutral/undecided	Neutral/Undecided	Agree	Neutral/Undecided	Strongly disagree
36	Male	Married	1-3 Persons	Rented Falt/House	Central (Amman, Zarqa, Madaba, Al-Balqaa)	Non-smoker	Medical	General Practitioner	Jordanian Ministry of Health	Full-Time	<700 JDs	40-48	1-3 on-calls	Yes	No	No	Often	Sometimes	Sometimes	Sometimes	Sometimes	Rarely	Often	Rarely	Often	Often	Neutral/undecided	Neutral/Undecided	Neutral/Undecided	Neutral/Undecided	Disagree
28	Male	Single	>6 Persons	Rented Falt/House	Central (Amman, Zarqa, Madaba, Al-Balqaa)	Smoker	Medical	Resident	Jordanian Ministry of Health	Full-Time	<700 JDs	40-48	>3	No	No	No	Always	Always	Often	Very Often	Sometimes	Often	Sometimes	Often	Sometimes	Sometimes	Agree	Agree	Strongly Agree	Neutral/Undecided	Agree
30	Female	Single	1-3 Persons	Owned Falt/House	Central (Amman, Zarqa, Madaba, Al-Balqaa)	Non-smoker	Medical	Resident	Jordanian Ministry of Health	Full-Time	<700 JDs	40-48	1-3 on-calls	No	No	No	Very Often	Often	Often	Often	Always	Very Often	Sometimes	Always	Often	Sometimes	Neutral/undecided	Neutral/Undecided	Neutral/Undecided	Disagree	Agree
35	Male	Married	4-6 Persons	Rented Falt/House	Central (Amman, Zarqa, Madaba, Al-Balqaa)	Smoker	Medical	Resident	Jordanian Ministry of Health	Full-Time	<700 JDs	>48	>3	No	No	No	Always	Always	Always	Always	Often	Always	Always	Always	Always	Always	Strongly disagree	Neutral/Undecided	Strongly Agree	Strongly disagree	Strongly agree
24	Male	Single	1-3 Persons	Owned Falt/House	Central (Amman, Zarqa, Madaba, Al-Balqaa)	Non-smoker	Medical	General Practitioner	Jordanian Royal Medical Services	Full-Time	<700 JDs	<40	0	No	No	No	Sometimes	Always	Always	Always	Always	Very Often	Never	Always	Never	Very Often	Strongly disagree	Strongly disagree	Agree	Strongly disagree	Strongly agree
25	Female	Single	1-3 Persons	Owned Falt/House	Central (Amman, Zarqa, Madaba, Al-Balqaa)	Non-smoker	Medical	General Practitioner	Jordanian Royal Medical Services	Full-Time	<700 JDs	<40	0	No	No	No	Rarely	Very Often	Very Often	Very Often	Sometimes	Often	Sometimes	Almost Never	Very Often	Often	Disagree	Disagree	Agree	Disagree	Agree
24	Female	Single	4-6 Persons	Owned Falt/House	North (Irbid, Ajloun, Jerash, Mafraq)	Non-smoker	Medical	General Practitioner	Jordanian Royal Medical Services	Part-Time	<700 JDs	<40	0	No	No	No	Sometimes	Sometimes	Sometimes	Sometimes	Sometimes	Sometimes	Sometimes	Rarely	Sometimes	Sometimes	Neutral/undecided	Agree	Neutral/Undecided	Agree	Neutral/Undecided
25	Male	Single	>6 Persons	Owned Falt/House	North (Irbid, Ajloun, Jerash, Mafraq)	Smoker	Medical	General Practitioner	University Hospitals	Part-Time	<700 JDs	<40	0	Yes	No	No	Rarely	Very Often	Rarely	Often	Rarely	Very Often	Very Often	Rarely	Very Often	Sometimes	Neutral/undecided	Neutral/Undecided	Disagree	Agree	Disagree
24	Female	Single	>6 Persons	Owned Falt/House	North (Irbid, Ajloun, Jerash, Mafraq)	Non-smoker	Medical	General Practitioner	University Hospitals	Full-Time	<700 JDs	<40	1-3 on-calls	Yes	No	No	Often	Sometimes	Rarely	Sometimes	Rarely	Rarely	Very Often	Sometimes	Often	Often	Neutral/undecided	Agree	Agree	Neutral/Undecided	Neutral/Undecided
24	Female	Single	>6 Persons	Owned Falt/House	Central (Amman, Zarqa, Madaba, Al-Balqaa)	Non-smoker	Medical	General Practitioner	University Hospitals	Part-Time	<700 JDs	<40	0	Yes	No	No	Almost Never	Sometimes	Sometimes	Sometimes	Rarely	Rarely	Rarely	Rarely	Almost Never	Rarely	Agree	Agree	Agree	Agree	Disagree
24	Female	Single	>6 Persons	Rented Falt/House	Central (Amman, Zarqa, Madaba, Al-Balqaa)	Non-smoker	Medical	General Practitioner	University Hospitals	Full-Time	<700 JDs	<40	1-3 on-calls	No	No	No	Very Often	Very Often	Often	Often	Often	Very Often	Often	Often	Often	Sometimes	Neutral/undecided	Neutral/Undecided	Neutral/Undecided	Agree	Neutral/Undecided
25	Female	Single	1-3 Persons	Rented Falt/House	Central (Amman, Zarqa, Madaba, Al-Balqaa)	Non-smoker	Medical	General Practitioner	Private Hospitals/Clinics	Full-Time	<700 JDs	<40	0	No	No	No	Almost Never	Never	Never	Never	Almost Never	Never	Never	Never	Never	Never	Neutral/undecided	Agree	Disagree	Agree	Disagree
24	Female	Single	>6 Persons	Rented Falt/House	Central (Amman, Zarqa, Madaba, Al-Balqaa)	Non-smoker	Medical	General Practitioner	Private Hospitals/Clinics	Part-Time	700-1400 JDs	<40	0	Yes	No	No	Rarely	Almost Never	Almost Never	Almost Never	Never	Never	Almost Never	Almost Never	Almost Never	Never	Strongly Agree	Agree	Strongly disagree	Agree	Strongly disagree
24	Female	Single	4-6 Persons	Owned Falt/House	North (Irbid, Ajloun, Jerash, Mafraq)	Non-smoker	Medical	General Practitioner	University Hospitals	Part-Time	<700 JDs	<40	1-3 on-calls	Yes	No	No	Sometimes	Sometimes	Sometimes	Sometimes	Sometimes	Sometimes	Sometimes	Sometimes	Rarely	Sometimes	Neutral/undecided	Neutral/Undecided	Neutral/Undecided	Neutral/Undecided	Neutral/Undecided
24	Female	Single	4-6 Persons	Owned Falt/House	North (Irbid, Ajloun, Jerash, Mafraq)	Non-smoker	Medical	General Practitioner	University Hospitals	Part-Time	<700 JDs	<40	1-3 on-calls	Yes	No	No	Sometimes	Sometimes	Sometimes	Sometimes	Sometimes	Sometimes	Sometimes	Sometimes	Rarely	Sometimes	Neutral/undecided	Neutral/Undecided	Neutral/Undecided	Neutral/Undecided	Neutral/Undecided
30	Female	Single	4-6 Persons	Owned Falt/House	North (Irbid, Ajloun, Jerash, Mafraq)	Non-smoker	Medical	Specialist	Jordanian Royal Medical Services	Full-Time	700-1400 JDs	<40	0	Yes	No	No	Almost Never	Sometimes	Rarely	Rarely	Often	Rarely	Rarely	Rarely	Almost Never	Sometimes	Agree	Neutral/Undecided	Neutral/Undecided	Neutral/Undecided	Neutral/Undecided
31	Female	Single	1-3 Persons	Rented Falt/House	Central (Amman, Zarqa, Madaba, Al-Balqaa)	Non-smoker	Medical	Specialist	Private Hospitals/Clinics	Full-Time	700-1400 JDs	>48	0	Yes	No	No	Always	Always	Always	Always	Always	Always	Very Often	Very Often	Very Often	Always	Strongly disagree	Strongly disagree	Strongly Agree	Strongly disagree	Strongly agree
32	Female	Married	>6 Persons	Owned Falt/House	Central (Amman, Zarqa, Madaba, Al-Balqaa)	Non-smoker	Medical	Specialist	Private Hospitals/Clinics	Part-Time	>1400 JDs	<40	0	Yes	No	No	Almost Never	Sometimes	Almost Never	Rarely	Rarely	Rarely	Rarely	Rarely	Almost Never	Never	Disagree	Agree	Strongly disagree	Strongly agree	Strongly disagree
31	Female	Married	1-3 Persons	Rented Falt/House	Central (Amman, Zarqa, Madaba, Al-Balqaa)	Non-smoker	Medical	Specialist	Private Hospitals/Clinics	Full-Time	700-1400 JDs	40-48	0	Yes	No	Yes	Sometimes	Often	Sometimes	Rarely	Rarely	Sometimes	Rarely	Rarely	Almost Never	Rarely	Neutral/undecided	Neutral/Undecided	Disagree	Neutral/Undecided	Disagree
28	Female	Married	1-3 Persons	Rented Falt/House	North (Irbid, Ajloun, Jerash, Mafraq)	Non-smoker	Medical	Resident	Jordanian Royal Medical Services	Part-Time	700-1400 JDs	>48	1-3 on-calls	Yes	No	No	Often	Sometimes	Rarely	Often	Rarely	Sometimes	Sometimes	Rarely	Often	Sometimes	Neutral/undecided	Disagree	Disagree	Neutral/Undecided	Disagree
34	Female	Single	>6 Persons	Owned Falt/House	Central (Amman, Zarqa, Madaba, Al-Balqaa)	Non-smoker	Medical	Resident	Jordanian Royal Medical Services	Full-Time	<700 JDs	40-48	0	No	No	No	Sometimes	Often	Often	Rarely	Rarely	Rarely	Never	Never	Rarely	Rarely	Neutral/undecided	Neutral/Undecided	Neutral/Undecided	Agree	Disagree
30	Female	Married	4-6 Persons	Owned Falt/House	Central (Amman, Zarqa, Madaba, Al-Balqaa)	Non-smoker	Medical	Resident	Jordanian Royal Medical Services	Full-Time	700-1400 JDs	>48	1-3 on-calls	Yes	No	No	Always	Very Often	Often	Often	Sometimes	Often	Often	Sometimes	Sometimes	Always	Agree	Neutral/Undecided	Strongly Agree	Disagree	Agree
26	Female	Single	>6 Persons	Owned Falt/House	Central (Amman, Zarqa, Madaba, Al-Balqaa)	Non-smoker	Surgical	Resident	Private Hospitals/Clinics	Full-Time	<700 JDs	>48	1-3 on-calls	Yes	No	No	Always	Always	Always	Always	Always	Always	Always	Always	Always	Always	Disagree	Strongly disagree	Strongly Agree	Disagree	Agree
27	Female	Married	1-3 Persons	Rented Falt/House	Central (Amman, Zarqa, Madaba, Al-Balqaa)	Non-smoker	Medical	Resident	Private Hospitals/Clinics	Full-Time	<700 JDs	>48	1-3 on-calls	Yes	No	Yes	Very Often	Always	Very Often	Always	Very Often	Always	Very Often	Often	Often	Sometimes	Disagree	Strongly disagree	Agree	Strongly disagree	Strongly agree
28	Female	Single	4-6 Persons	Owned Falt/House	Central (Amman, Zarqa, Madaba, Al-Balqaa)	Smoker	Medical	General Practitioner	Private Hospitals/Clinics	Full-Time	700-1400 JDs	>48	1-3 on-calls	Yes	Yes	No	Sometimes	Sometimes	Rarely	Sometimes	Almost Never	Sometimes	Often	Rarely	Often	Sometimes	Neutral/undecided	Neutral/Undecided	Neutral/Undecided	Neutral/Undecided	Agree
25	Female	Single	4-6 Persons	Owned Falt/House	Central (Amman, Zarqa, Madaba, Al-Balqaa)	Smoker	Medical	General Practitioner	Private Hospitals/Clinics	Full-Time	700-1400 JDs	40-48	1-3 on-calls	Yes	Yes	No	Sometimes	Almost Never	Rarely	Almost Never	Almost Never	Almost Never	Rarely	Almost Never	Rarely	Almost Never	Strongly Agree	Strongly Agree	Disagree	Strongly agree	Strongly disagree
29	Female	Single	>6 Persons	Rented Falt/House	Central (Amman, Zarqa, Madaba, Al-Balqaa)	Non-smoker	Medical	Resident	Jordanian Royal Medical Services	Part-Time	<700 JDs	<40	1-3 on-calls	No	No	No	Sometimes	Sometimes	Sometimes	Sometimes	Sometimes	Sometimes	Sometimes	Sometimes	Sometimes	Sometimes	Agree	Disagree	Agree	Agree	Disagree
31	Female	Married	1-3 Persons	Rented Falt/House	Central (Amman, Zarqa, Madaba, Al-Balqaa)	Non-smoker	Surgical	Resident	Jordanian Royal Medical Services	Full-Time	700-1400 JDs	>48	1-3 on-calls	No	No	Yes	Very Often	Very Often	Very Often	Sometimes	Sometimes	Sometimes	Very Often	Sometimes	Very Often	Often	Neutral/undecided	Neutral/Undecided	Agree	Disagree	Agree
27	Female	Single	>6 Persons	Rented Falt/House	Central (Amman, Zarqa, Madaba, Al-Balqaa)	Non-smoker	Medical	Resident	Jordanian Ministry of Health	Full-Time	<700 JDs	<40	0	No	No	No	Very Often	Always	Always	Always	Always	Always	Often	Sometimes	Sometimes	Sometimes	Strongly disagree	Disagree	Neutral/Undecided	Strongly disagree	Strongly agree
30	Female	Married	>6 Persons	Owned Falt/House	Central (Amman, Zarqa, Madaba, Al-Balqaa)	Non-smoker	Medical	Resident	Jordanian Royal Medical Services	Full-Time	700-1400 JDs	>48	1-3 on-calls	No	No	No	Always	Very Often	Sometimes	Very Often	Never	Often	Often	Never	Often	Very Often	Disagree	Neutral/Undecided	Agree	Neutral/Undecided	Neutral/Undecided
29	Female	Single	>6 Persons	Owned Falt/House	North (Irbid, Ajloun, Jerash, Mafraq)	Non-smoker	Medical	Resident	Jordanian Royal Medical Services	Full-Time	700-1400 JDs	>48	1-3 on-calls	Yes	No	No	Very Often	Sometimes	Sometimes	Sometimes	Sometimes	Sometimes	Sometimes	Almost Never	Sometimes	Sometimes	Neutral/undecided	Neutral/Undecided	Neutral/Undecided	Disagree	Neutral/Undecided
26	Male	Married	1-3 Persons	Owned Falt/House	North (Irbid, Ajloun, Jerash, Mafraq)	Non-smoker	Medical	Resident	Jordanian Royal Medical Services	Full-Time	700-1400 JDs	>48	1-3 on-calls	Yes	No	Yes	Very Often	Always	Very Often	Sometimes	Very Often	Very Often	Sometimes	Sometimes	Sometimes	Very Often	Disagree	Neutral/Undecided	Neutral/Undecided	Neutral/Undecided	Agree
29	Male	Single	>6 Persons	Owned Falt/House	Central (Amman, Zarqa, Madaba, Al-Balqaa)	Non-smoker	Medical	Resident	Jordanian Royal Medical Services	Full-Time	<700 JDs	40-48	1-3 on-calls	No	No	No	Often	Sometimes	Sometimes	Often	Rarely	Sometimes	Sometimes	Rarely	Rarely	Sometimes	Neutral/undecided	Neutral/Undecided	Agree	Agree	Agree
27	Male	Single	4-6 Persons	Owned Falt/House	Central (Amman, Zarqa, Madaba, Al-Balqaa)	Smoker	Medical	Resident	Jordanian Royal Medical Services	Full-Time	<700 JDs	>48	>3	Yes	No	Yes	Always	Very Often	Always	Always	Very Often	Always	Always	Always	Very Often	Always	Strongly disagree	Agree	Strongly Agree	Strongly disagree	Strongly agree
34	Female	Single	>6 Persons	Owned Falt/House	Central (Amman, Zarqa, Madaba, Al-Balqaa)	Non-smoker	Medical	Resident	Jordanian Royal Medical Services	Full-Time	<700 JDs	40-48	0	No	No	No	Sometimes	Often	Often	Rarely	Rarely	Rarely	Never	Never	Rarely	Rarely	Neutral/undecided	Neutral/Undecided	Neutral/Undecided	Agree	Disagree
27	Female	Married	1-3 Persons	Owned Falt/House	Central (Amman, Zarqa, Madaba, Al-Balqaa)	Non-smoker	Medical	Resident	Jordanian Royal Medical Services	Full-Time	700-1400 JDs	40-48	0	Yes	No	No	Often	Sometimes	Rarely	Almost Never	Sometimes	Rarely	Sometimes	Never	Rarely	Sometimes	Agree	Neutral/Undecided	Disagree	Agree	Disagree
30	Male	Married	1-3 Persons	Rented Falt/House	Central (Amman, Zarqa, Madaba, Al-Balqaa)	Non-smoker	Medical	Resident	Jordanian Royal Medical Services	Full-Time	<700 JDs	>48	1-3 on-calls	Yes	No	Yes	Always	Always	Always	Very Often	Very Often	Always	Very Often	Often	Sometimes	Often	Disagree	Neutral/Undecided	Strongly Agree	Strongly disagree	Strongly agree
31	Female	Single	1-3 Persons	Rented Falt/House	Central (Amman, Zarqa, Madaba, Al-Balqaa)	Non-smoker	Medical	Resident	Jordanian Royal Medical Services	Full-Time	<700 JDs	>48	1-3 on-calls	No	No	No	Sometimes	Very Often	Sometimes	Sometimes	Rarely	Often	Often	Sometimes	Rarely	Often	Neutral/undecided	Neutral/Undecided	Disagree	Neutral/Undecided	Neutral/Undecided
31	Male	Married	4-6 Persons	Owned Falt/House	Central (Amman, Zarqa, Madaba, Al-Balqaa)	Smoker	Medical	Resident	Jordanian Royal Medical Services	Full-Time	700-1400 JDs	>48	>3	No	No	Yes	Always	Always	Always	Very Often	Often	Very Often	Very Often	Often	Very Often	Very Often	Neutral/undecided	Neutral/Undecided	Strongly Agree	Neutral/Undecided	Neutral/Undecided
27	Female	Single	1-3 Persons	Owned Falt/House	Central (Amman, Zarqa, Madaba, Al-Balqaa)	Non-smoker	Medical	Resident	Jordanian Royal Medical Services	Full-Time	<700 JDs	40-48	1-3 on-calls	No	No	Yes	Very Often	Always	Often	Often	Very Often	Always	Sometimes	Sometimes	Often	Often	Neutral/undecided	Disagree	Disagree	Neutral/Undecided	Neutral/Undecided
32	Female	Married	1-3 Persons	Rented Falt/House	Central (Amman, Zarqa, Madaba, Al-Balqaa)	Non-smoker	Medical	Specialist	Jordanian Royal Medical Services	Full-Time	700-1400 JDs	40-48	1-3 on-calls	Yes	No	Yes	Always	Very Often	Rarely	Sometimes	Very Often	Sometimes	Often	Often	Sometimes	Sometimes	Neutral/undecided	Neutral/Undecided	Agree	Agree	Disagree
30	Female	Single	1-3 Persons	Owned Falt/House	North (Irbid, Ajloun, Jerash, Mafraq)	Non-smoker	Medical	Resident	Jordanian Royal Medical Services	Full-Time	700-1400 JDs	<40	0	No	No	No	Very Often	Very Often	Rarely	Sometimes	Sometimes	Rarely	Rarely	Rarely	Sometimes	Sometimes	Neutral/undecided	Agree	Neutral/Undecided	Agree	Disagree
29	Female	Single	1-3 Persons	Rented Falt/House	Central (Amman, Zarqa, Madaba, Al-Balqaa)	Non-smoker	Surgical	Resident	Private Hospitals/Clinics	Full-Time	<700 JDs	>48	1-3 on-calls	Yes	No	No	Very Often	Often	Often	Sometimes	Often	Sometimes	Sometimes	Sometimes	Rarely	Sometimes	Neutral/undecided	Neutral/Undecided	Neutral/Undecided	Neutral/Undecided	Neutral/Undecided
31	Female	Married	1-3 Persons	Rented Falt/House	Central (Amman, Zarqa, Madaba, Al-Balqaa)	Non-smoker	Medical	Specialist	Private Hospitals/Clinics	Full-Time	700-1400 JDs	40-48	1-3 on-calls	No	No	No	Sometimes	Sometimes	Rarely	Rarely	Almost Never	Sometimes	Sometimes	Never	Often	Sometimes	Neutral/undecided	Neutral/Undecided	Disagree	Neutral/Undecided	Neutral/Undecided
29	Female	Single	>6 Persons	Owned Falt/House	North (Irbid, Ajloun, Jerash, Mafraq)	Non-smoker	Medical	Resident	Jordanian Ministry of Health	Full-Time	700-1400 JDs	>48	1-3 on-calls	No	No	No	Very Often	Very Often	Very Often	Often	Often	Always	Often	Rarely	Very Often	Very Often	Disagree	Neutral/Undecided	Agree	Neutral/Undecided	Neutral/Undecided
31	Female	Single	4-6 Persons	Owned Falt/House	Central (Amman, Zarqa, Madaba, Al-Balqaa)	Non-smoker	Medical	Specialist	Jordanian Royal Medical Services	Full-Time	700-1400 JDs	40-48	1-3 on-calls	No	No	Yes	Sometimes	Often	Sometimes	Rarely	Almost Never	Sometimes	Rarely	Rarely	Rarely	Almost Never	Neutral/undecided	Neutral/Undecided	Neutral/Undecided	Neutral/Undecided	Neutral/Undecided
29	Female	Married	1-3 Persons	Rented Falt/House	Central (Amman, Zarqa, Madaba, Al-Balqaa)	Non-smoker	Medical	Resident	Jordanian Ministry of Health	Full-Time	700-1400 JDs	<40	1-3 on-calls	No	No	No	Often	Very Often	Sometimes	Sometimes	Sometimes	Sometimes	Sometimes	Often	Sometimes	Very Often	Neutral/undecided	Neutral/Undecided	Disagree	Neutral/Undecided	Neutral/Undecided
29	Female	Married	1-3 Persons	Owned Falt/House	Central (Amman, Zarqa, Madaba, Al-Balqaa)	Non-smoker	Medical	Resident	Jordanian Royal Medical Services	Full-Time	700-1400 JDs	>48	1-3 on-calls	No	No	Yes	Very Often	Very Often	Often	Always	Rarely	Rarely	Often	Never	Sometimes	Often	Disagree	Agree	Disagree	Agree	Disagree
29	Female	Married	1-3 Persons	Rented Falt/House	Central (Amman, Zarqa, Madaba, Al-Balqaa)	Non-smoker	Medical	Resident	Private Hospitals/Clinics	Full-Time	<700 JDs	40-48	0	No	No	No	Sometimes	Often	Never	Rarely	Rarely	Never	Sometimes	Never	Almost Never	Sometimes	Agree	Agree	Neutral/Undecided	Strongly agree	Strongly disagree
29	Female	Married	1-3 Persons	Owned Falt/House	Central (Amman, Zarqa, Madaba, Al-Balqaa)	Non-smoker	Medical	General Practitioner	Jordanian Ministry of Health	Full-Time	700-1400 JDs	40-48	0	No	No	No	Very Often	Rarely	Sometimes	Very Often	Rarely	Rarely	Sometimes	Never	Almost Never	Sometimes	Disagree	Agree	Disagree	Neutral/Undecided	Neutral/Undecided
26	Female	Single	4-6 Persons	Owned Falt/House	Central (Amman, Zarqa, Madaba, Al-Balqaa)	Non-smoker	Medical	General Practitioner	Private Hospitals/Clinics	Full-Time	700-1400 JDs	>48	1-3 on-calls	Yes	No	No	Often	Sometimes	Sometimes	Often	Rarely	Sometimes	Rarely	Rarely	Rarely	Rarely	Neutral/undecided	Agree	Neutral/Undecided	Agree	Disagree
29	Female	Married	1-3 Persons	Owned Falt/House	Central (Amman, Zarqa, Madaba, Al-Balqaa)	Non-smoker	Medical	Resident	Jordanian Royal Medical Services	Full-Time	700-1400 JDs	>48	1-3 on-calls	No	No	Yes	Very Often	Very Often	Often	Always	Rarely	Rarely	Often	Never	Sometimes	Often	Disagree	Agree	Disagree	Agree	Disagree
31	Female	Single	1-3 Persons	Owned Falt/House	Central (Amman, Zarqa, Madaba, Al-Balqaa)	Non-smoker	Medical	Resident	Jordanian Royal Medical Services	Full-Time	700-1400 JDs	>48	>3	No	No	Yes	Always	Very Often	Often	Very Often	Sometimes	Very Often	Very Often	Rarely	Very Often	Very Often	Strongly disagree	Disagree	Strongly Agree	Disagree	Agree
29	Female	Single	1-3 Persons	Owned Falt/House	Central (Amman, Zarqa, Madaba, Al-Balqaa)	Non-smoker	Medical	Resident	Jordanian Royal Medical Services	Full-Time	700-1400 JDs	40-48	1-3 on-calls	Yes	No	No	Always	Very Often	Very Often	Very Often	Sometimes	Very Often	Very Often	Often	Sometimes	Often	Disagree	Disagree	Disagree	Neutral/Undecided	Agree
26	Female	Married	1-3 Persons	Owned Falt/House	Central (Amman, Zarqa, Madaba, Al-Balqaa)	Non-smoker	Medical	Resident	Jordanian Royal Medical Services	Full-Time	<700 JDs	<40	1-3 on-calls	No	No	Yes	Very Often	Always	Always	Always	Always	Always	Often	Always	Sometimes	Always	Neutral/undecided	Neutral/Undecided	Neutral/Undecided	Neutral/Undecided	Disagree
28	Female	Married	1-3 Persons	Rented Falt/House	South (Aqapa, Karak, Maan, Tafileh)	Non-smoker	Medical	Resident	Jordanian Royal Medical Services	Full-Time	700-1400 JDs	>48	>3	No	No	Yes	Always	Always	Always	Always	Always	Always	Always	Always	Always	Always	Neutral/undecided	Neutral/Undecided	Strongly Agree	Strongly disagree	Strongly disagree
28	Female	Married	1-3 Persons	Rented Falt/House	Central (Amman, Zarqa, Madaba, Al-Balqaa)	Non-smoker	Medical	Resident	Jordanian Royal Medical Services	Full-Time	700-1400 JDs	40-48	1-3 on-calls	Yes	No	No	Very Often	Often	Often	Often	Often	Often	Often	Often	Often	Often	Neutral/undecided	Neutral/Undecided	Neutral/Undecided	Disagree	Agree
29	Female	Married	1-3 Persons	Rented Falt/House	Central (Amman, Zarqa, Madaba, Al-Balqaa)	Non-smoker	Medical	Resident	Jordanian Royal Medical Services	Full-Time	700-1400 JDs	>48	>3	No	No	Yes	Always	Very Often	Sometimes	Often	Often	Often	Always	Sometimes	Very Often	Very Often	Neutral/undecided	Neutral/Undecided	Agree	Disagree	Agree
27	Female	Married	1-3 Persons	Owned Falt/House	Central (Amman, Zarqa, Madaba, Al-Balqaa)	Non-smoker	Medical	Resident	Jordanian Royal Medical Services	Full-Time	<700 JDs	>48	1-3 on-calls	No	No	Yes	Very Often	Always	Often	Often	Sometimes	Often	Often	Almost Never	Often	Sometimes	Neutral/undecided	Disagree	Disagree	Agree	Disagree
29	Female	Married	1-3 Persons	Owned Falt/House	Central (Amman, Zarqa, Madaba, Al-Balqaa)	Non-smoker	Medical	Resident	Jordanian Ministry of Health	Full-Time	700-1400 JDs	40-48	1-3 on-calls	No	No	No	Often	Often	Sometimes	Often	Sometimes	Very Often	Very Often	Sometimes	Rarely	Sometimes	Neutral/undecided	Neutral/Undecided	Agree	Disagree	Agree
25	Female	Single	4-6 Persons	Owned Falt/House	Central (Amman, Zarqa, Madaba, Al-Balqaa)	Smoker	Medical	General Practitioner	Private Hospitals/Clinics	Full-Time	700-1400 JDs	40-48	1-3 on-calls	Yes	Yes	No	Sometimes	Almost Never	Rarely	Almost Never	Almost Never	Almost Never	Rarely	Almost Never	Rarely	Almost Never	Strongly Agree	Strongly Agree	Disagree	Strongly agree	Strongly disagree
31	Female	Single	1-3 Persons	Owned Falt/House	Central (Amman, Zarqa, Madaba, Al-Balqaa)	Non-smoker	Medical	Resident	Jordanian Royal Medical Services	Full-Time	700-1400 JDs	>48	>3	No	No	Yes	Always	Very Often	Often	Very Often	Sometimes	Very Often	Very Often	Rarely	Very Often	Very Often	Strongly disagree	Disagree	Strongly Agree	Disagree	Agree
31	Female	Single	4-6 Persons	Owned Falt/House	Central (Amman, Zarqa, Madaba, Al-Balqaa)	Non-smoker	Medical	Specialist	Jordanian Royal Medical Services	Full-Time	700-1400 JDs	40-48	1-3 on-calls	No	No	Yes	Sometimes	Often	Sometimes	Rarely	Almost Never	Sometimes	Rarely	Rarely	Rarely	Almost Never	Neutral/undecided	Neutral/Undecided	Neutral/Undecided	Neutral/Undecided	Neutral/Undecided
27	Female	Married	1-3 Persons	Rented Falt/House	South (Aqapa, Karak, Maan, Tafileh)	Non-smoker	Medical	Resident	Jordanian Royal Medical Services	Full-Time	700-1400 JDs	40-48	1-3 on-calls	Yes	No	Yes	Often	Rarely	Never	Rarely	Rarely	Rarely	Rarely	Never	Often	Sometimes	Neutral/undecided	Neutral/Undecided	Agree	Neutral/Undecided	Disagree
29	Female	Married	1-3 Persons	Rented Falt/House	Central (Amman, Zarqa, Madaba, Al-Balqaa)	Non-smoker	Medical	Resident	Private Hospitals/Clinics	Full-Time	<700 JDs	40-48	0	No	No	No	Sometimes	Often	Never	Rarely	Rarely	Never	Sometimes	Never	Almost Never	Sometimes	Agree	Agree	Neutral/Undecided	Strongly agree	Strongly disagree
27	Female	Married	1-3 Persons	Rented Falt/House	Central (Amman, Zarqa, Madaba, Al-Balqaa)	Non-smoker	Medical	Resident	Jordanian Royal Medical Services	Full-Time	<700 JDs	>48	1-3 on-calls	No	No	Yes	Always	Very Often	Very Often	Very Often	Often	Often	Very Often	Sometimes	Often	Very Often	Strongly disagree	Neutral/Undecided	Strongly Agree	Strongly disagree	Neutral/Undecided
27	Female	Married	1-3 Persons	Rented Falt/House	Central (Amman, Zarqa, Madaba, Al-Balqaa)	Non-smoker	Medical	Resident	Jordanian Royal Medical Services	Full-Time	<700 JDs	>48	1-3 on-calls	No	No	Yes	Always	Very Often	Very Often	Very Often	Often	Often	Very Often	Sometimes	Often	Very Often	Strongly disagree	Neutral/Undecided	Strongly Agree	Strongly disagree	Neutral/Undecided
30	Female	Single	1-3 Persons	Rented Falt/House	Central (Amman, Zarqa, Madaba, Al-Balqaa)	Non-smoker	Surgical	Resident	Private Hospitals/Clinics	Full-Time	<700 JDs	>48	1-3 on-calls	No	No	No	Always	Very Often	Always	Very Often	Sometimes	Sometimes	Almost Never	Rarely	Often	Often	Neutral/undecided	Disagree	Neutral/Undecided	Neutral/Undecided	Neutral/Undecided
27	Female	Married	1-3 Persons	Owned Falt/House	Central (Amman, Zarqa, Madaba, Al-Balqaa)	Non-smoker	Medical	Resident	Jordanian Royal Medical Services	Full-Time	700-1400 JDs	40-48	0	Yes	No	No	Often	Sometimes	Rarely	Almost Never	Sometimes	Rarely	Sometimes	Never	Rarely	Sometimes	Agree	Neutral/Undecided	Disagree	Agree	Disagree
27	Male	Single	4-6 Persons	Owned Falt/House	Central (Amman, Zarqa, Madaba, Al-Balqaa)	Non-smoker	Medical	General Practitioner	Jordanian Ministry of Health	Full-Time	700-1400 JDs	40-48	0	No	No	No	Often	Very Often	Rarely	Rarely	Rarely	Rarely	Sometimes	Never	Almost Never	Rarely	Agree	Neutral/Undecided	Neutral/Undecided	Agree	Disagree
39	Male	Married	4-6 Persons	Owned Falt/House	Central (Amman, Zarqa, Madaba, Al-Balqaa)	Smoker	Medical	Specialist	Jordanian Ministry of Health	Full-Time	700-1400 JDs	40-48	1-3 on-calls	No	No	No	Sometimes	Rarely	Sometimes	Rarely	Sometimes	Sometimes	Sometimes	Sometimes	Sometimes	Sometimes	Strongly disagree	Strongly disagree	Agree	Strongly disagree	Strongly agree
53	Male	Married	4-6 Persons	Owned Falt/House	Central (Amman, Zarqa, Madaba, Al-Balqaa)	Non-smoker	Surgical	Consultant	Private Hospitals/Clinics	Full-Time	>1400 JDs	<40	0	No	No	No	Almost Never	Sometimes	Rarely	Sometimes	Almost Never	Rarely	Sometimes	Almost Never	Rarely	Rarely	Neutral/undecided	Strongly Agree	Disagree	Strongly agree	Disagree
77	Male	Married	1-3 Persons	Owned Falt/House	Central (Amman, Zarqa, Madaba, Al-Balqaa)	Non-smoker	Surgical	Consultant	Private Hospitals/Clinics	Part-Time	>1400 JDs	<40	0	Yes	No	No	Sometimes	Sometimes	Almost Never	Rarely	Rarely	Never	Almost Never	Never	Never	Never	Disagree	Strongly Agree	Disagree	Strongly agree	Strongly disagree
60	Male	Married	4-6 Persons	Owned Falt/House	Central (Amman, Zarqa, Madaba, Al-Balqaa)	Non-smoker	Medical	Consultant	University Hospitals	Full-Time	>1400 JDs	<40	0	No	No	No	Sometimes	Often	Sometimes	Sometimes	Rarely	Sometimes	Sometimes	Sometimes	Often	Often	Disagree	Disagree	Neutral/Undecided	Neutral/Undecided	Agree
63	Male	Married	1-3 Persons	Owned Falt/House	Central (Amman, Zarqa, Madaba, Al-Balqaa)	Non-smoker	Medical	Consultant	Private Hospitals/Clinics	Full-Time	>1400 JDs	<40	0	Yes	No	No	Sometimes	Rarely	Almost Never	Rarely	Never	Never	Rarely	Never	Sometimes	Almost Never	Agree	Agree	Disagree	Strongly agree	Strongly disagree
51	Male	Married	4-6 Persons	Owned Falt/House	Central (Amman, Zarqa, Madaba, Al-Balqaa)	Smoker	Surgical	Consultant	Private Hospitals/Clinics	Full-Time	>1400 JDs	<40	0	No	No	No	Often	Sometimes	Sometimes	Sometimes	Sometimes	Often	Often	Sometimes	Often	Sometimes	Neutral/undecided	Neutral/Undecided	Disagree	Disagree	Disagree
39	Female	Married	4-6 Persons	Owned Falt/House	Central (Amman, Zarqa, Madaba, Al-Balqaa)	Non-smoker	Medical	Consultant	Private Hospitals/Clinics	Part-Time	<700 JDs	<40	0	No	No	Yes	Rarely	Sometimes	Almost Never	Never	Never	Almost Never	Rarely	Never	Almost Never	Almost Never	Agree	Neutral/Undecided	Disagree	Agree	Disagree
39	Female	Married	4-6 Persons	Owned Falt/House	Central (Amman, Zarqa, Madaba, Al-Balqaa)	Smoker	Medical	General Practitioner	Private Hospitals/Clinics	Part-Time	700-1400 JDs	<40	0	Yes	No	No	Never	Sometimes	Rarely	Almost Never	Never	Almost Never	Almost Never	Sometimes	Very Often	Almost Never	Neutral/undecided	Agree	Neutral/Undecided	Agree	Disagree
69	Male	Married	1-3 Persons	Owned Falt/House	Central (Amman, Zarqa, Madaba, Al-Balqaa)	Smoker	Medical	Specialist	Non-Governmental Organizations	Part-Time	<700 JDs	<40	0	No	No	No	Almost Never	Sometimes	Almost Never	Almost Never	Almost Never	Never	Never	Never	Almost Never	Almost Never	Neutral/undecided	Agree	Disagree	Agree	Disagree
39	Female	Married	1-3 Persons	Owned Falt/House	Central (Amman, Zarqa, Madaba, Al-Balqaa)	Non-smoker	Surgical	Specialist	Jordanian Ministry of Health	Full-Time	700-1400 JDs	40-48	1-3 on-calls	No	No	No	Often	Always	Very Often	Very Often	Often	Very Often	Sometimes	Never	Never	Rarely	Neutral/undecided	Neutral/Undecided	Disagree	Agree	Disagree
39	Female	Married	4-6 Persons	Owned Falt/House	Central (Amman, Zarqa, Madaba, Al-Balqaa)	Smoker	Medical	General Practitioner	Private Hospitals/Clinics	Part-Time	700-1400 JDs	<40	0	Yes	No	No	Never	Sometimes	Rarely	Almost Never	Never	Almost Never	Almost Never	Sometimes	Very Often	Almost Never	Neutral/undecided	Agree	Neutral/Undecided	Agree	Disagree
38	Female	Married	>6 Persons	Owned Falt/House	Central (Amman, Zarqa, Madaba, Al-Balqaa)	Non-smoker	Medical	Specialist	Private Hospitals/Clinics	Full-Time	>1400 JDs	>48	0	No	No	No	Always	Sometimes	Sometimes	Sometimes	Sometimes	Sometimes	Sometimes	Sometimes	Rarely	Sometimes	Agree	Agree	Neutral/Undecided	Neutral/Undecided	Neutral/Undecided
39	Female	Single	1-3 Persons	Owned Falt/House	Central (Amman, Zarqa, Madaba, Al-Balqaa)	Non-smoker	Surgical	Specialist	Private Hospitals/Clinics	Full-Time	>1400 JDs	40-48	1-3 on-calls	Yes	No	No	Rarely	Sometimes	Sometimes	Sometimes	Almost Never	Rarely	Never	Never	Almost Never	Rarely	Neutral/undecided	Neutral/Undecided	Disagree	Neutral/Undecided	Strongly disagree
49	Female	Married	4-6 Persons	Owned Falt/House	Central (Amman, Zarqa, Madaba, Al-Balqaa)	Non-smoker	Surgical	Consultant	Private Hospitals/Clinics	Full-Time	>1400 JDs	<40	0	No	No	No	Sometimes	Sometimes	Rarely	Almost Never	Rarely	Rarely	Rarely	Almost Never	Never	Almost Never	Agree	Agree	Disagree	Agree	Disagree
42	Female	Married	4-6 Persons	Owned Falt/House	Central (Amman, Zarqa, Madaba, Al-Balqaa)	Non-smoker	Medical	Specialist	Private Hospitals/Clinics	Full-Time	<700 JDs	<40	0	Yes	No	No	Sometimes	Often	Sometimes	Sometimes	Rarely	Very Often	Sometimes	Never	Almost Never	Almost Never	Agree	Agree	Neutral/Undecided	Agree	Strongly disagree
35	Female	Married	1-3 Persons	Owned Falt/House	Central (Amman, Zarqa, Madaba, Al-Balqaa)	Non-smoker	Medical	Specialist	Private Hospitals/Clinics	Full-Time	>1400 JDs	>48	0	Yes	No	No	Often	Rarely	Never	Never	Never	Never	Almost Never	Never	Never	Sometimes	Strongly Agree	Neutral/Undecided	Disagree	Strongly agree	Disagree
54	Male	Married	4-6 Persons	Rented Falt/House	Central (Amman, Zarqa, Madaba, Al-Balqaa)	Smoker	Medical	Consultant	Private Hospitals/Clinics	Full-Time	>1400 JDs	<40	1-3 on-calls	No	No	No	Sometimes	Often	Sometimes	Sometimes	Rarely	Rarely	Rarely	Never	Rarely	Rarely	Neutral/undecided	Disagree	Disagree	Neutral/Undecided	Disagree
31	Male	Single	4-6 Persons	Owned Falt/House	North (Irbid, Ajloun, Jerash, Mafraq)	Smoker	Medical	Specialist	Non-Governmental Organizations	Full-Time	>1400 JDs	40-48	1-3 on-calls	Yes	No	Yes	Sometimes	Rarely	Never	Rarely	Almost Never	Rarely	Almost Never	Never	Rarely	Almost Never	Agree	Agree	Disagree	Strongly agree	Disagree
34	Female	Married	4-6 Persons	Owned Falt/House	Central (Amman, Zarqa, Madaba, Al-Balqaa)	Non-smoker	Medical	Consultant	Private Hospitals/Clinics	Full-Time	>1400 JDs	<40	0	No	No	No	Very Often	Often	Often	Often	Often	Very Often	Sometimes	Often	Sometimes	Sometimes	Agree	Agree	Neutral/Undecided	Agree	Disagree
74	Male	Single	1-3 Persons	Owned Falt/House	Central (Amman, Zarqa, Madaba, Al-Balqaa)	Non-smoker	Medical	Consultant	Private Hospitals/Clinics	Part-Time	700-1400 JDs	>48	0	Yes	No	No	Very Often	Sometimes	Almost Never	Almost Never	Almost Never	Almost Never	Almost Never	Almost Never	Almost Never	Almost Never	Neutral/undecided	Neutral/Undecided	Disagree	Agree	Disagree
50	Male	Married	4-6 Persons	Owned Falt/House	Central (Amman, Zarqa, Madaba, Al-Balqaa)	Smoker	Surgical	Consultant	Private Hospitals/Clinics	Full-Time	>1400 JDs	40-48	0	Yes	No	No	Sometimes	Sometimes	Rarely	Sometimes	Rarely	Sometimes	Often	Almost Never	Rarely	Sometimes	Agree	Agree	Disagree	Agree	Neutral/Undecided
60	Male	Married	1-3 Persons	Owned Falt/House	Central (Amman, Zarqa, Madaba, Al-Balqaa)	Smoker	Medical	Consultant	Jordanian Ministry of Health	Full-Time	>1400 JDs	<40	0	No	No	No	Almost Never	Never	Never	Never	Never	Never	Almost Never	Never	Never	Never	Agree	Agree	Strongly disagree	Agree	Strongly disagree
64	Male	Married	1-3 Persons	Owned Falt/House	Central (Amman, Zarqa, Madaba, Al-Balqaa)	Smoker	Medical	General Practitioner	Private Hospitals/Clinics	Part-Time	<700 JDs	40-48	0	Yes	No	No	Almost Never	Sometimes	Sometimes	Rarely	Almost Never	Almost Never	Rarely	Almost Never	Almost Never	Almost Never	Neutral/undecided	Neutral/Undecided	Neutral/Undecided	Neutral/Undecided	Disagree
61	Male	Married	4-6 Persons	Rented Falt/House	Central (Amman, Zarqa, Madaba, Al-Balqaa)	Smoker	Medical	Consultant	Jordanian Ministry of Health	Full-Time	700-1400 JDs	>48	>3	No	No	No	Always	Sometimes	Sometimes	Often	Sometimes	Often	Often	Rarely	Rarely	Often	Neutral/undecided	Neutral/Undecided	Agree	Neutral/Undecided	Neutral/Undecided
65	Male	Married	4-6 Persons	Owned Falt/House	Central (Amman, Zarqa, Madaba, Al-Balqaa)	Non-smoker	Medical	Consultant	Private Hospitals/Clinics	Full-Time	<700 JDs	40-48	0	No	No	No	Sometimes	Rarely	Almost Never	Almost Never	Almost Never	Almost Never	Almost Never	Almost Never	Almost Never	Almost Never	Agree	Strongly Agree	Strongly disagree	Strongly agree	Strongly disagree
62	Male	Married	1-3 Persons	Owned Falt/House	Central (Amman, Zarqa, Madaba, Al-Balqaa)	Non-smoker	Medical	Consultant	Private Hospitals/Clinics	Full-Time	700-1400 JDs	<40	0	No	No	No	Sometimes	Rarely	Often	Rarely	Never	Rarely	Sometimes	Sometimes	Sometimes	Rarely	Agree	Neutral/Undecided	Disagree	Neutral/Undecided	Disagree
50	Male	Married	4-6 Persons	Owned Falt/House	Central (Amman, Zarqa, Madaba, Al-Balqaa)	Smoker	Surgical	Consultant	Private Hospitals/Clinics	Full-Time	>1400 JDs	40-48	0	Yes	No	No	Sometimes	Sometimes	Rarely	Sometimes	Rarely	Sometimes	Often	Almost Never	Rarely	Sometimes	Agree	Agree	Disagree	Agree	Neutral/Undecided
75	Male	Married	1-3 Persons	Owned Falt/House	Central (Amman, Zarqa, Madaba, Al-Balqaa)	Smoker	Surgical	Consultant	Private Hospitals/Clinics	Full-Time	700-1400 JDs	<40	0	No	No	No	Rarely	Never	Never	Rarely	Almost Never	Rarely	Rarely	Almost Never	Sometimes	Rarely	Agree	Agree	Strongly disagree	Agree	Strongly disagree
75	Male	Married	1-3 Persons	Owned Falt/House	Central (Amman, Zarqa, Madaba, Al-Balqaa)	Non-smoker	Medical	General Practitioner	Private Hospitals/Clinics	Full-Time	>1400 JDs	<40	0	Yes	No	No	Rarely	Very Often	Rarely	Sometimes	Sometimes	Sometimes	Rarely	Never	Rarely	Rarely	Agree	Agree	Disagree	Agree	Disagree
24	Female	Single	>6 Persons	Rented Falt/House	North (Irbid, Ajloun, Jerash, Mafraq)	Smoker	Medical	General Practitioner	Jordanian Ministry of Health	Full-Time	<700 JDs	>48	>3	No	Yes	Yes	Always	Very Often	Often	Always	Always	Always	Sometimes	Often	Sometimes	Often	Strongly disagree	Agree	Neutral/Undecided	Strongly disagree	Agree
40	Male	Married	4-6 Persons	Owned Falt/House	Central (Amman, Zarqa, Madaba, Al-Balqaa)	Smoker	Surgical	Specialist	Private Hospitals/Clinics	Full-Time	>1400 JDs	<40	0	Yes	No	Yes	Sometimes	Sometimes	Rarely	Rarely	Almost Never	Rarely	Sometimes	Rarely	Never	Never	Neutral/undecided	Neutral/Undecided	Agree	Neutral/Undecided	Disagree
59	Male	Married	1-3 Persons	Owned Falt/House	Central (Amman, Zarqa, Madaba, Al-Balqaa)	Non-smoker	Medical	Consultant	Private Hospitals/Clinics	Full-Time	700-1400 JDs	<40	0	Yes	No	No	Sometimes	Rarely	Never	Rarely	Almost Never	Almost Never	Sometimes	Never	Almost Never	Almost Never	Agree	Neutral/Undecided	Disagree	Agree	Strongly disagree
50	Female	Married	4-6 Persons	Owned Falt/House	Central (Amman, Zarqa, Madaba, Al-Balqaa)	Non-smoker	Surgical	Consultant	Jordanian Royal Medical Services	Full-Time	>1400 JDs	40-48	0	Yes	No	No	Sometimes	Sometimes	Rarely	Rarely	Rarely	Sometimes	Sometimes	Never	Almost Never	Rarely	Strongly Agree	Agree	Disagree	Agree	Strongly disagree
66	Male	Married	4-6 Persons	Owned Falt/House	Central (Amman, Zarqa, Madaba, Al-Balqaa)	Non-smoker	Medical	Consultant	Private Hospitals/Clinics	Full-Time	700-1400 JDs	<40	0	Yes	No	No	Very Often	Very Often	Often	Very Often	Often	Sometimes	Sometimes	Often	Sometimes	Sometimes	Agree	Neutral/Undecided	Disagree	Neutral/Undecided	Neutral/Undecided
40	Male	Married	1-3 Persons	Rented Falt/House	Central (Amman, Zarqa, Madaba, Al-Balqaa)	Non-smoker	Surgical	Specialist	Jordanian Ministry of Health	Full-Time	700-1400 JDs	>48	1-3 on-calls	Yes	No	No	Sometimes	Sometimes	Rarely	Sometimes	Sometimes	Sometimes	Rarely	Rarely	Often	Often	Neutral/undecided	Neutral/Undecided	Neutral/Undecided	Neutral/Undecided	Neutral/Undecided
38	Male	Married	1-3 Persons	Rented Falt/House	Central (Amman, Zarqa, Madaba, Al-Balqaa)	Smoker	Surgical	Specialist	Jordanian Ministry of Health	Full-Time	700-1400 JDs	40-48	>3	No	No	No	Very Often	Very Often	Very Often	Often	Very Often	Very Often	Very Often	Often	Very Often	Very Often	Neutral/undecided	Disagree	Strongly Agree	Disagree	Agree
38	Male	Married	1-3 Persons	Rented Falt/House	Central (Amman, Zarqa, Madaba, Al-Balqaa)	Smoker	Surgical	Specialist	Jordanian Ministry of Health	Full-Time	700-1400 JDs	40-48	>3	No	No	No	Very Often	Very Often	Very Often	Often	Very Often	Very Often	Very Often	Often	Very Often	Very Often	Neutral/undecided	Disagree	Strongly Agree	Disagree	Agree
38	Male	Married	1-3 Persons	Rented Falt/House	Central (Amman, Zarqa, Madaba, Al-Balqaa)	Smoker	Surgical	Specialist	Jordanian Ministry of Health	Full-Time	700-1400 JDs	40-48	>3	No	No	No	Very Often	Very Often	Very Often	Often	Very Often	Very Often	Very Often	Often	Very Often	Very Often	Neutral/undecided	Disagree	Strongly Agree	Disagree	Agree
51	Female	Single	4-6 Persons	Owned Falt/House	Central (Amman, Zarqa, Madaba, Al-Balqaa)	Non-smoker	Medical	Consultant	Jordanian Ministry of Health	Full-Time	>1400 JDs	>48	1-3 on-calls	No	No	No	Very Often	Very Often	Always	Very Often	Very Often	Very Often	Always	Very Often	Sometimes	Often	Neutral/undecided	Neutral/Undecided	Neutral/Undecided	Neutral/Undecided	Neutral/Undecided
39	Female	Single	1-3 Persons	Owned Falt/House	Central (Amman, Zarqa, Madaba, Al-Balqaa)	Non-smoker	Surgical	Specialist	Private Hospitals/Clinics	Full-Time	>1400 JDs	40-48	1-3 on-calls	Yes	No	No	Rarely	Sometimes	Sometimes	Sometimes	Almost Never	Rarely	Never	Never	Almost Never	Rarely	Neutral/undecided	Neutral/Undecided	Disagree	Neutral/Undecided	Strongly disagree
40	Male	Married	4-6 Persons	Owned Falt/House	Central (Amman, Zarqa, Madaba, Al-Balqaa)	Smoker	Medical	Consultant	Private Hospitals/Clinics	Full-Time	>1400 JDs	<40	0	Yes	No	No	Rarely	Sometimes	Almost Never	Rarely	Often	Often	Very Often	Rarely	Rarely	Often	Neutral/undecided	Neutral/Undecided	Neutral/Undecided	Agree	Disagree
69	Male	Married	4-6 Persons	Owned Falt/House	Central (Amman, Zarqa, Madaba, Al-Balqaa)	Non-smoker	Medical	Consultant	Private Hospitals/Clinics	Full-Time	>1400 JDs	>48	1-3 on-calls	Yes	No	No	Almost Never	Never	Never	Rarely	Almost Never	Almost Never	Never	Never	Almost Never	Never	Agree	Agree	Disagree	Agree	Strongly disagree
62	Male	Married	4-6 Persons	Rented Falt/House	Central (Amman, Zarqa, Madaba, Al-Balqaa)	Non-smoker	Surgical	Consultant	University Hospitals	Full-Time	>1400 JDs	40-48	0	No	No	No	Sometimes	Often	Rarely	Sometimes	Sometimes	Rarely	Sometimes	Never	Never	Sometimes	Neutral/undecided	Agree	Disagree	Neutral/Undecided	Disagree
54	Male	Married	>6 Persons	Owned Falt/House	Central (Amman, Zarqa, Madaba, Al-Balqaa)	Non-smoker	Surgical	Consultant	Private Hospitals/Clinics	Full-Time	>1400 JDs	>48	0	Yes	No	No	Sometimes	Sometimes	Rarely	Sometimes	Rarely	Rarely	Sometimes	Rarely	Sometimes	Rarely	Strongly Agree	Strongly Agree	Disagree	Strongly agree	Strongly disagree
32	Female	Married	1-3 Persons	Rented Falt/House	South (Aqapa, Karak, Maan, Tafileh)	Smoker	Medical	General Practitioner	Jordanian Ministry of Health	Full-Time	<700 JDs	40-48	0	Yes	Yes	Yes	Never	Never	Never	Never	Never	Never	Never	Never	Never	Never	Strongly disagree	Neutral/Undecided	Agree	Disagree	Disagree
32	Female	Married	1-3 Persons	Rented Falt/House	South (Aqapa, Karak, Maan, Tafileh)	Smoker	Medical	General Practitioner	Jordanian Ministry of Health	Full-Time	<700 JDs	40-48	0	Yes	Yes	Yes	Never	Never	Never	Never	Never	Never	Never	Never	Never	Never	Strongly disagree	Neutral/Undecided	Agree	Disagree	Disagree
62	Male	Married	4-6 Persons	Owned Falt/House	Central (Amman, Zarqa, Madaba, Al-Balqaa)	Non-smoker	Medical	Consultant	University Hospitals	Part-Time	>1400 JDs	<40	0	No	No	No	Rarely	Rarely	Sometimes	Sometimes	Sometimes	Sometimes	Often	Very Often	Very Often	Often	Agree	Strongly Agree	Strongly Agree	Agree	Disagree
54	Male	Married	4-6 Persons	Owned Falt/House	Central (Amman, Zarqa, Madaba, Al-Balqaa)	Smoker	Medical	Consultant	Private Hospitals/Clinics	Part-Time	>1400 JDs	<40	0	Yes	No	No	Sometimes	Sometimes	Rarely	Almost Never	Rarely	Rarely	Sometimes	Never	Rarely	Rarely	Agree	Agree	Disagree	Agree	Disagree
56	Male	Married	4-6 Persons	Owned Falt/House	Central (Amman, Zarqa, Madaba, Al-Balqaa)	Non-smoker	Medical	General Practitioner	Private Hospitals/Clinics	Full-Time	>1400 JDs	40-48	0	Yes	No	No	Sometimes	Almost Never	Almost Never	Almost Never	Almost Never	Never	Rarely	Never	Almost Never	Almost Never	Strongly disagree	Agree	Disagree	Strongly agree	Strongly disagree
66	Male	Married	1-3 Persons	Owned Falt/House	Central (Amman, Zarqa, Madaba, Al-Balqaa)	Smoker	Medical	General Practitioner	Private Hospitals/Clinics	Full-Time	>1400 JDs	40-48	0	Yes	No	No	Often	Sometimes	Rarely	Rarely	Never	Rarely	Rarely	Never	Almost Never	Never	Agree	Agree	Disagree	Agree	Disagree
37	Male	Married	4-6 Persons	Owned Falt/House	Central (Amman, Zarqa, Madaba, Al-Balqaa)	Smoker	Medical	General Practitioner	Private Hospitals/Clinics	Full-Time	700-1400 JDs	40-48	0	Yes	No	Yes	Always	Often	Often	Often	Always	Always	Very Often	Sometimes	Often	Often	Agree	Agree	Agree	Agree	Agree
68	Male	Married	4-6 Persons	Rented Falt/House	Central (Amman, Zarqa, Madaba, Al-Balqaa)	Smoker	Medical	General Practitioner	Private Hospitals/Clinics	Full-Time	700-1400 JDs	>48	1-3 on-calls	Yes	No	No	Sometimes	Sometimes	Often	Sometimes	Sometimes	Often	Sometimes	Sometimes	Rarely	Sometimes	Disagree	Disagree	Neutral/Undecided	Agree	Agree
24	Male	Single	4-6 Persons	Owned Falt/House	Central (Amman, Zarqa, Madaba, Al-Balqaa)	Non-smoker	Medical	General Practitioner	Jordanian Ministry of Health	Full-Time	<700 JDs	<40	0	No	No	No	Sometimes	Very Often	Often	Always	Very Often	Often	Rarely	Rarely	Rarely	Often	Strongly disagree	Strongly disagree	Agree	Disagree	Strongly agree
54	Male	Married	4-6 Persons	Owned Falt/House	Central (Amman, Zarqa, Madaba, Al-Balqaa)	Smoker	Surgical	Consultant	Private Hospitals/Clinics	Full-Time	>1400 JDs	40-48	>3	No	No	No	Rarely	Sometimes	Almost Never	Almost Never	Never	Never	Never	Never	Almost Never	Never	Strongly Agree	Agree	Strongly disagree	Agree	Strongly disagree
45	Male	Married	1-3 Persons	Owned Falt/House	Central (Amman, Zarqa, Madaba, Al-Balqaa)	Smoker	Surgical	Consultant	Private Hospitals/Clinics	Full-Time	>1400 JDs	40-48	0	No	No	No	Sometimes	Very Often	Often	Sometimes	Sometimes	Sometimes	Sometimes	Rarely	Sometimes	Often	Neutral/undecided	Neutral/Undecided	Neutral/Undecided	Neutral/Undecided	Agree
66	Male	Married	1-3 Persons	Owned Falt/House	Central (Amman, Zarqa, Madaba, Al-Balqaa)	Non-smoker	Medical	General Practitioner	Private Hospitals/Clinics	Part-Time	>1400 JDs	<40	0	Yes	Yes	No	Rarely	Very Often	Sometimes	Sometimes	Rarely	Sometimes	Sometimes	Sometimes	Rarely	Sometimes	Neutral/undecided	Agree	Agree	Neutral/Undecided	Disagree
34	Female	Single	>6 Persons	Rented Falt/House	North (Irbid, Ajloun, Jerash, Mafraq)	Smoker	Medical	Resident	University Hospitals	Full-Time	700-1400 JDs	>48	>3	No	No	No	Sometimes	Sometimes	Sometimes	Sometimes	Sometimes	Often	Very Often	Almost Never	Always	Often	Neutral/undecided	Strongly Agree	Disagree	Neutral/Undecided	Agree
49	Female	Married	4-6 Persons	Rented Falt/House	Central (Amman, Zarqa, Madaba, Al-Balqaa)	Smoker	Surgical	Consultant	Private Hospitals/Clinics	Full-Time	>1400 JDs	<40	0	Yes	No	No	Rarely	Rarely	Almost Never	Sometimes	Rarely	Often	Rarely	Almost Never	Often	Sometimes	Neutral/undecided	Agree	Agree	Agree	Agree
66	Male	Married	4-6 Persons	Owned Falt/House	Central (Amman, Zarqa, Madaba, Al-Balqaa)	Non-smoker	Medical	General Practitioner	Private Hospitals/Clinics	Part-Time	>1400 JDs	40-48	0	No	No	No	Sometimes	Sometimes	Rarely	Sometimes	Sometimes	Rarely	Sometimes	Rarely	Rarely	Sometimes	Agree	Neutral/Undecided	Disagree	Agree	Disagree
25	Male	Single	4-6 Persons	Owned Falt/House	Central (Amman, Zarqa, Madaba, Al-Balqaa)	Smoker	Medical	General Practitioner	Private Hospitals/Clinics	Full-Time	<700 JDs	40-48	1-3 on-calls	Yes	No	No	Very Often	Very Often	Always	Sometimes	Very Often	Sometimes	Rarely	Sometimes	Always	Rarely	Disagree	Disagree	Neutral/Undecided	Disagree	Neutral/Undecided
38	Female	Single	1-3 Persons	Rented Falt/House	Central (Amman, Zarqa, Madaba, Al-Balqaa)	Non-smoker	Surgical	Specialist	Private Hospitals/Clinics	Full-Time	>1400 JDs	40-48	1-3 on-calls	Yes	No	No	Often	Very Often	Sometimes	Sometimes	Sometimes	Often	Sometimes	Rarely	Rarely	Often	Agree	Agree	Disagree	Agree	Strongly disagree
25	Male	Single	4-6 Persons	Owned Falt/House	Central (Amman, Zarqa, Madaba, Al-Balqaa)	Smoker	Medical	General Practitioner	Private Hospitals/Clinics	Full-Time	<700 JDs	40-48	1-3 on-calls	Yes	No	No	Very Often	Very Often	Always	Sometimes	Very Often	Sometimes	Rarely	Sometimes	Always	Rarely	Disagree	Disagree	Neutral/Undecided	Disagree	Neutral/Undecided
61	Male	Married	4-6 Persons	Owned Falt/House	Central (Amman, Zarqa, Madaba, Al-Balqaa)	Non-smoker	Medical	Consultant	Private Hospitals/Clinics	Full-Time	>1400 JDs	>48	0	Yes	Yes	No	Sometimes	Sometimes	Rarely	Rarely	Never	Rarely	Never	Never	Never	Rarely	Agree	Neutral/Undecided	Agree	Disagree	Neutral/Undecided
55	Male	Married	1-3 Persons	Owned Falt/House	Central (Amman, Zarqa, Madaba, Al-Balqaa)	Non-smoker	Surgical	Consultant	University Hospitals	Full-Time	>1400 JDs	40-48	1-3 on-calls	Yes	No	Yes	Sometimes	Sometimes	Sometimes	Sometimes	Rarely	Often	Sometimes	Rarely	Sometimes	Often	Disagree	Neutral/Undecided	Disagree	Neutral/Undecided	Neutral/Undecided
54	Male	Married	4-6 Persons	Owned Falt/House	Central (Amman, Zarqa, Madaba, Al-Balqaa)	Smoker	Medical	Consultant	Private Hospitals/Clinics	Part-Time	>1400 JDs	<40	0	Yes	No	No	Sometimes	Sometimes	Rarely	Almost Never	Rarely	Rarely	Sometimes	Never	Rarely	Rarely	Agree	Agree	Disagree	Agree	Disagree
54	Male	Married	4-6 Persons	Owned Falt/House	Central (Amman, Zarqa, Madaba, Al-Balqaa)	Smoker	Surgical	Consultant	Private Hospitals/Clinics	Full-Time	>1400 JDs	40-48	>3	No	No	No	Rarely	Sometimes	Almost Never	Almost Never	Never	Never	Never	Never	Almost Never	Never	Strongly Agree	Agree	Strongly disagree	Agree	Strongly disagree
49	Male	Married	4-6 Persons	Owned Falt/House	North (Irbid, Ajloun, Jerash, Mafraq)	Smoker	Surgical	Consultant	University Hospitals	Full-Time	>1400 JDs	<40	0	Yes	Yes	No	Sometimes	Often	Rarely	Sometimes	Never	Never	Rarely	Never	Sometimes	Sometimes	Agree	Neutral/Undecided	Disagree	Strongly agree	Disagree
28	Female	Single	1-3 Persons	Rented Falt/House	South (Aqapa, Karak, Maan, Tafileh)	Non-smoker	Medical	Resident	Jordanian Ministry of Health	Full-Time	700-1400 JDs	40-48	1-3 on-calls	Yes	Yes	No	Never	Sometimes	Rarely	Almost Never	Sometimes	Rarely	Almost Never	Never	Rarely	Rarely	Strongly Agree	Strongly Agree	Strongly disagree	Strongly agree	Strongly disagree
46	Male	Married	4-6 Persons	Rented Falt/House	North (Irbid, Ajloun, Jerash, Mafraq)	Smoker	Surgical	Specialist	Jordanian Royal Medical Services	Full-Time	>1400 JDs	40-48	1-3 on-calls	Yes	Yes	No	Often	Very Often	Very Often	Sometimes	Very Often	Rarely	Often	Sometimes	Always	Often	Strongly disagree	Disagree	Strongly Agree	Disagree	Agree
30	Male	Single	4-6 Persons	Owned Falt/House	Central (Amman, Zarqa, Madaba, Al-Balqaa)	Smoker	Surgical	Resident	University Hospitals	Full-Time	<700 JDs	>48	1-3 on-calls	Yes	Yes	Yes	Always	Often	Sometimes	Rarely	Often	Sometimes	Always	Often	Very Often	Very Often	Disagree	Strongly disagree	Strongly Agree	Disagree	Agree
44	Male	Married	4-6 Persons	Rented Falt/House	Central (Amman, Zarqa, Madaba, Al-Balqaa)	Non-smoker	Surgical	Specialist	Private Hospitals/Clinics	Full-Time	>1400 JDs	40-48	0	No	No	No	Very Often	Rarely	Rarely	Often	Almost Never	Never	Very Often	Sometimes	Very Often	Rarely	Neutral/undecided	Neutral/Undecided	Disagree	Disagree	Neutral/Undecided
25	Male	Single	>6 Persons	Owned Falt/House	Central (Amman, Zarqa, Madaba, Al-Balqaa)	Smoker	Medical	General Practitioner	University Hospitals	Full-Time	<700 JDs	>48	1-3 on-calls	Yes	Yes	No	Always	Almost Never	Almost Never	Rarely	Sometimes	Sometimes	Always	Rarely	Rarely	Rarely	Disagree	Disagree	Agree	Disagree	Agree
28	Female	Single	>6 Persons	Owned Falt/House	Central (Amman, Zarqa, Madaba, Al-Balqaa)	Non-smoker	Surgical	Resident	Private Hospitals/Clinics	Full-Time	700-1400 JDs	40-48	1-3 on-calls	Yes	No	No	Always	Always	Rarely	Sometimes	Rarely	Rarely	Often	Rarely	Always	Often	Agree	Disagree	Agree	Neutral/Undecided	Agree
58	Male	Married	4-6 Persons	Owned Falt/House	Central (Amman, Zarqa, Madaba, Al-Balqaa)	Smoker	Surgical	Consultant	Jordanian Ministry of Health	Full-Time	>1400 JDs	<40	0	Yes	Yes	No	Sometimes	Often	Never	Rarely	Never	Rarely	Often	Almost Never	Sometimes	Sometimes	Agree	Agree	Disagree	Agree	Agree
63	Male	Single	1-3 Persons	Rented Falt/House	Central (Amman, Zarqa, Madaba, Al-Balqaa)	Smoker	Medical	Consultant	Private Hospitals/Clinics	Part-Time	>1400 JDs	<40	0	No	No	No	Very Often	Very Often	Very Often	Very Often	Often	Often	Often	Sometimes	Often	Often	Neutral/undecided	Agree	Disagree	Neutral/Undecided	Agree
43	Female	Single	1-3 Persons	Rented Falt/House	North (Irbid, Ajloun, Jerash, Mafraq)	Non-smoker	Medical	Specialist	Private Hospitals/Clinics	Full-Time	>1400 JDs	<40	0	No	No	No	Sometimes	Often	Sometimes	Sometimes	Sometimes	Sometimes	Sometimes	Sometimes	Sometimes	Sometimes	Strongly Agree	Agree	Disagree	Agree	Strongly disagree
73	Male	Single	1-3 Persons	Owned Falt/House	North (Irbid, Ajloun, Jerash, Mafraq)	Smoker	Medical	General Practitioner	Private Hospitals/Clinics	Part-Time	>1400 JDs	<40	0	Yes	No	No	Rarely	Sometimes	Rarely	Rarely	Rarely	Rarely	Sometimes	Rarely	Rarely	Rarely	Agree	Agree	Disagree	Agree	Disagree
51	Male	Married	4-6 Persons	Owned Falt/House	Central (Amman, Zarqa, Madaba, Al-Balqaa)	Smoker	Surgical	Consultant	Private Hospitals/Clinics	Full-Time	>1400 JDs	<40	0	No	No	No	Often	Sometimes	Sometimes	Sometimes	Sometimes	Often	Often	Sometimes	Often	Sometimes	Neutral/undecided	Neutral/Undecided	Disagree	Disagree	Disagree
27	Male	Single	>6 Persons	Rented Falt/House	Central (Amman, Zarqa, Madaba, Al-Balqaa)	Smoker	Medical	Resident	Jordanian Ministry of Health	Full-Time	700-1400 JDs	>48	>3	Yes	Yes	No	Often	Very Often	Very Often	Always	Always	Often	Very Often	Always	Always	Often	Disagree	Disagree	Agree	Strongly disagree	Agree
49	Male	Married	4-6 Persons	Owned Falt/House	Central (Amman, Zarqa, Madaba, Al-Balqaa)	Non-smoker	Surgical	Consultant	Private Hospitals/Clinics	Full-Time	>1400 JDs	40-48	0	No	No	No	Often	Sometimes	Rarely	Sometimes	Almost Never	Very Often	Very Often	Sometimes	Often	Sometimes	Agree	Agree	Neutral/Undecided	Agree	Disagree
39	Female	Married	4-6 Persons	Owned Falt/House	Central (Amman, Zarqa, Madaba, Al-Balqaa)	Non-smoker	Surgical	Consultant	Jordanian Royal Medical Services	Full-Time	>1400 JDs	40-48	1-3 on-calls	Yes	Yes	No	Often	Always	Rarely	Sometimes	Very Often	Rarely	Often	Rarely	Rarely	Rarely	Strongly Agree	Strongly Agree	Disagree	Agree	Disagree
39	Female	Married	4-6 Persons	Owned Falt/House	Central (Amman, Zarqa, Madaba, Al-Balqaa)	Non-smoker	Medical	Consultant	Private Hospitals/Clinics	Full-Time	>1400 JDs	40-48	0	Yes	No	No	Sometimes	Sometimes	Rarely	Rarely	Sometimes	Sometimes	Sometimes	Almost Never	Almost Never	Rarely	Strongly Agree	Strongly Agree	Disagree	Agree	Strongly disagree
61	Male	Married	4-6 Persons	Owned Falt/House	Central (Amman, Zarqa, Madaba, Al-Balqaa)	Non-smoker	Surgical	Consultant	Private Hospitals/Clinics	Full-Time	700-1400 JDs	<40	0	Yes	No	No	Rarely	Sometimes	Rarely	Rarely	Sometimes	Rarely	Sometimes	Almost Never	Rarely	Rarely	Agree	Neutral/Undecided	Strongly disagree	Agree	Disagree
40	Female	Married	1-3 Persons	Owned Falt/House	Central (Amman, Zarqa, Madaba, Al-Balqaa)	Non-smoker	Surgical	Consultant	Jordanian Royal Medical Services	Part-Time	>1400 JDs	<40	0	No	No	No	Sometimes	Very Often	Sometimes	Sometimes	Rarely	Sometimes	Rarely	Almost Never	Sometimes	Sometimes	Neutral/undecided	Disagree	Neutral/Undecided	Neutral/Undecided	Strongly disagree
38	Male	Single	4-6 Persons	Owned Falt/House	Central (Amman, Zarqa, Madaba, Al-Balqaa)	Smoker	Medical	Specialist	Jordanian Ministry of Health	Full-Time	>1400 JDs	40-48	1-3 on-calls	Yes	Yes	Yes	Very Often	Often	Sometimes	Sometimes	Sometimes	Sometimes	Often	Rarely	Often	Often	Neutral/undecided	Strongly disagree	Agree	Neutral/Undecided	Agree
45	Female	Married	1-3 Persons	Rented Falt/House	North (Irbid, Ajloun, Jerash, Mafraq)	Non-smoker	Medical	Specialist	Private Hospitals/Clinics	Full-Time	>1400 JDs	40-48	1-3 on-calls	Yes	No	No	Sometimes	Sometimes	Rarely	Sometimes	Sometimes	Rarely	Sometimes	Rarely	Often	Almost Never	Strongly Agree	Neutral/Undecided	Strongly disagree	Agree	Strongly disagree
57	Male	Married	4-6 Persons	Owned Falt/House	Central (Amman, Zarqa, Madaba, Al-Balqaa)	Smoker	Surgical	Consultant	Private Hospitals/Clinics	Full-Time	>1400 JDs	40-48	1-3 on-calls	Yes	No	No	Very Often	Very Often	Rarely	Often	Often	Sometimes	Always	Never	Always	Often	Agree	Strongly Agree	Agree	Agree	Agree
27	Male	Single	>6 Persons	Rented Falt/House	South (Aqapa, Karak, Maan, Tafileh)	Non-smoker	Medical	General Practitioner	Jordanian Ministry of Health	Full-Time	700-1400 JDs	40-48	0	Yes	Yes	No	Sometimes	Rarely	Never	Never	Never	Never	Sometimes	Never	Very Often	Very Often	Strongly Agree	Agree	Disagree	Agree	Strongly disagree
51	Male	Married	4-6 Persons	Owned Falt/House	Central (Amman, Zarqa, Madaba, Al-Balqaa)	Smoker	Surgical	Specialist	Non-Governmental Organizations	Full-Time	>1400 JDs	40-48	0	Yes	Yes	No	Very Often	Often	Never	Never	Never	Rarely	Very Often	Never	Very Often	Rarely	Agree	Agree	Neutral/Undecided	Agree	Strongly disagree
61	Male	Married	4-6 Persons	Owned Falt/House	Central (Amman, Zarqa, Madaba, Al-Balqaa)	Smoker	Medical	Consultant	Private Hospitals/Clinics	Part-Time	>1400 JDs	<40	0	Yes	No	No	Always	Very Often	Almost Never	Sometimes	Rarely	Rarely	Often	Rarely	Rarely	Often	Agree	Agree	Strongly disagree	Agree	Strongly disagree
25	Female	Married	4-6 Persons	Owned Falt/House	Central (Amman, Zarqa, Madaba, Al-Balqaa)	Smoker	Medical	Resident	Private Hospitals/Clinics	Full-Time	<700 JDs	40-48	1-3 on-calls	Yes	No	No	Very Often	Very Often	Very Often	Very Often	Very Often	Very Often	Very Often	Very Often	Always	Very Often	Disagree	Disagree	Strongly Agree	Disagree	Strongly agree
44	Female	Married	4-6 Persons	Rented Falt/House	Central (Amman, Zarqa, Madaba, Al-Balqaa)	Smoker	Medical	Specialist	Private Hospitals/Clinics	Full-Time	>1400 JDs	<40	0	Yes	No	No	Often	Sometimes	Almost Never	Almost Never	Rarely	Often	Very Often	Often	Very Often	Often	Agree	Agree	Neutral/Undecided	Disagree	Agree
30	Female	Single	1-3 Persons	Rented Falt/House	North (Irbid, Ajloun, Jerash, Mafraq)	Smoker	Medical	Resident	University Hospitals	Full-Time	700-1400 JDs	40-48	0	Yes	No	No	Often	Often	Sometimes	Sometimes	Often	Often	Often	Rarely	Often	Often	Neutral/undecided	Neutral/Undecided	Neutral/Undecided	Neutral/Undecided	Neutral/Undecided
72	Male	Married	1-3 Persons	Owned Falt/House	Central (Amman, Zarqa, Madaba, Al-Balqaa)	Non-smoker	Medical	Consultant	Private Hospitals/Clinics	Part-Time	700-1400 JDs	<40	0	Yes	No	No	Often	Sometimes	Never	Never	Never	Very Often	Always	Never	Sometimes	Often	Agree	Agree	Agree	Agree	Neutral/Undecided
46	Female	Married	4-6 Persons	Owned Falt/House	Central (Amman, Zarqa, Madaba, Al-Balqaa)	Smoker	Medical	Consultant	Private Hospitals/Clinics	Full-Time	>1400 JDs	>48	1-3 on-calls	Yes	No	No	Always	Sometimes	Never	Never	Never	Sometimes	Very Often	Sometimes	Sometimes	Sometimes	Agree	Strongly Agree	Neutral/Undecided	Agree	Neutral/Undecided
40	Female	Married	1-3 Persons	Owned Falt/House	Central (Amman, Zarqa, Madaba, Al-Balqaa)	Non-smoker	Surgical	Consultant	Jordanian Royal Medical Services	Part-Time	>1400 JDs	<40	0	No	No	No	Sometimes	Very Often	Sometimes	Sometimes	Rarely	Sometimes	Rarely	Almost Never	Sometimes	Sometimes	Neutral/undecided	Disagree	Neutral/Undecided	Neutral/Undecided	Strongly disagree
39	Female	Married	4-6 Persons	Owned Falt/House	Central (Amman, Zarqa, Madaba, Al-Balqaa)	Non-smoker	Medical	Consultant	Private Hospitals/Clinics	Full-Time	>1400 JDs	40-48	0	Yes	No	No	Sometimes	Sometimes	Rarely	Rarely	Sometimes	Sometimes	Sometimes	Almost Never	Almost Never	Rarely	Strongly Agree	Strongly Agree	Disagree	Agree	Strongly disagree
51	Female	Single	4-6 Persons	Owned Falt/House	Central (Amman, Zarqa, Madaba, Al-Balqaa)	Non-smoker	Medical	Consultant	Jordanian Ministry of Health	Full-Time	>1400 JDs	>48	1-3 on-calls	No	No	No	Very Often	Very Often	Always	Very Often	Very Often	Very Often	Always	Very Often	Sometimes	Often	Neutral/undecided	Neutral/Undecided	Neutral/Undecided	Neutral/Undecided	Neutral/Undecided
35	Male	Single	4-6 Persons	Rented Falt/House	Central (Amman, Zarqa, Madaba, Al-Balqaa)	Smoker	Medical	Specialist	University Hospitals	Full-Time	700-1400 JDs	40-48	1-3 on-calls	Yes	Yes	No	Often	Very Often	Rarely	Sometimes	Rarely	Rarely	Sometimes	Rarely	Sometimes	Sometimes	Agree	Agree	Disagree	Neutral/Undecided	Neutral/Undecided
41	Male	Married	>6 Persons	Owned Falt/House	Central (Amman, Zarqa, Madaba, Al-Balqaa)	Smoker	Surgical	Specialist	Jordanian Royal Medical Services	Full-Time	>1400 JDs	40-48	1-3 on-calls	Yes	Yes	No	Very Often	Sometimes	Never	Never	Never	Never	Sometimes	Never	Very Often	Rarely	Agree	Neutral/Undecided	Strongly disagree	Agree	Strongly disagree
66	Male	Married	>6 Persons	Owned Falt/House	North (Irbid, Ajloun, Jerash, Mafraq)	Smoker	Surgical	Consultant	Private Hospitals/Clinics	Part-Time	>1400 JDs	<40	0	Yes	No	No	Almost Never	Almost Never	Never	Never	Never	Rarely	Rarely	Never	Never	Rarely	Agree	Agree	Strongly disagree	Agree	Strongly disagree
62	Male	Married	4-6 Persons	Owned Falt/House	Central (Amman, Zarqa, Madaba, Al-Balqaa)	Smoker	Surgical	Consultant	Private Hospitals/Clinics	Full-Time	>1400 JDs	<40	0	Yes	No	No	Sometimes	Almost Never	Almost Never	Rarely	Rarely	Sometimes	Sometimes	Never	Sometimes	Sometimes	Agree	Agree	Neutral/Undecided	Agree	Disagree
25	Female	Single	1-3 Persons	Rented Falt/House	North (Irbid, Ajloun, Jerash, Mafraq)	Non-smoker	Medical	General Practitioner	Private Hospitals/Clinics	Full-Time	<700 JDs	<40	0	Yes	No	Yes	Sometimes	Sometimes	Sometimes	Sometimes	Sometimes	Sometimes	Sometimes	Sometimes	Sometimes	Sometimes	Neutral/undecided	Neutral/Undecided	Neutral/Undecided	Neutral/Undecided	Neutral/Undecided
35	Female	Married	4-6 Persons	Rented Falt/House	Central (Amman, Zarqa, Madaba, Al-Balqaa)	Non-smoker	Surgical	Specialist	Jordanian Royal Medical Services	Full-Time	>1400 JDs	40-48	1-3 on-calls	Yes	Yes	No	Often	Rarely	Rarely	Often	Sometimes	Almost Never	Often	Sometimes	Sometimes	Sometimes	Agree	Agree	Disagree	Agree	Disagree
29	Male	Single	4-6 Persons	Owned Falt/House	North (Irbid, Ajloun, Jerash, Mafraq)	Non-smoker	Surgical	Resident	University Hospitals	Full-Time	700-1400 JDs	40-48	1-3 on-calls	Yes	No	No	Sometimes	Sometimes	Sometimes	Sometimes	Sometimes	Sometimes	Sometimes	Sometimes	Sometimes	Sometimes	Neutral/undecided	Neutral/Undecided	Neutral/Undecided	Neutral/Undecided	Neutral/Undecided
39	Male	Married	1-3 Persons	Rented Falt/House	Central (Amman, Zarqa, Madaba, Al-Balqaa)	Smoker	Surgical	Specialist	Private Hospitals/Clinics	Full-Time	>1400 JDs	40-48	1-3 on-calls	Yes	No	No	Rarely	Rarely	Sometimes	Sometimes	Rarely	Rarely	Sometimes	Rarely	Sometimes	Sometimes	Agree	Agree	Disagree	Agree	Disagree
26	Male	Single	1-3 Persons	Rented Falt/House	Central (Amman, Zarqa, Madaba, Al-Balqaa)	Smoker	Surgical	Resident	Jordanian Ministry of Health	Full-Time	700-1400 JDs	<40	1-3 on-calls	Yes	Yes	No	Never	Never	Never	Never	Never	Never	Never	Never	Rarely	Almost Never	Strongly Agree	Strongly Agree	Disagree	Agree	Disagree
39	Female	Married	1-3 Persons	Owned Falt/House	Central (Amman, Zarqa, Madaba, Al-Balqaa)	Non-smoker	Surgical	Specialist	Jordanian Ministry of Health	Full-Time	700-1400 JDs	>48	1-3 on-calls	Yes	No	No	Often	Often	Sometimes	Sometimes	Often	Often	Often	Sometimes	Sometimes	Sometimes	Neutral/undecided	Neutral/Undecided	Agree	Neutral/Undecided	Neutral/Undecided
37	Female	Married	4-6 Persons	Rented Falt/House	Central (Amman, Zarqa, Madaba, Al-Balqaa)	Smoker	Medical	Specialist	Private Hospitals/Clinics	Part-Time	>1400 JDs	<40	1-3 on-calls	Yes	No	No	Sometimes	Often	Rarely	Almost Never	Rarely	Rarely	Sometimes	Never	Very Often	Rarely	Strongly Agree	Agree	Strongly disagree	Agree	Strongly disagree
24	Male	Single	4-6 Persons	Owned Falt/House	Central (Amman, Zarqa, Madaba, Al-Balqaa)	Non-smoker	Medical	General Practitioner	Jordanian Ministry of Health	Full-Time	<700 JDs	<40	0	No	No	No	Sometimes	Very Often	Often	Always	Very Often	Often	Rarely	Rarely	Rarely	Often	Strongly disagree	Strongly disagree	Agree	Disagree	Strongly agree
54	Female	Married	>6 Persons	Owned Falt/House	Central (Amman, Zarqa, Madaba, Al-Balqaa)	Non-smoker	Surgical	Consultant	Jordanian Royal Medical Services	Full-Time	>1400 JDs	<40	1-3 on-calls	Yes	Yes	No	Very Often	Always	Sometimes	Sometimes	Sometimes	Sometimes	Always	Rarely	Sometimes	Sometimes	Disagree	Disagree	Neutral/Undecided	Agree	Agree
54	Female	Married	>6 Persons	Owned Falt/House	Central (Amman, Zarqa, Madaba, Al-Balqaa)	Non-smoker	Surgical	Consultant	Jordanian Royal Medical Services	Full-Time	>1400 JDs	<40	1-3 on-calls	Yes	Yes	No	Very Often	Always	Sometimes	Sometimes	Sometimes	Sometimes	Always	Rarely	Sometimes	Sometimes	Disagree	Disagree	Neutral/Undecided	Agree	Agree
54	Female	Married	>6 Persons	Owned Falt/House	Central (Amman, Zarqa, Madaba, Al-Balqaa)	Non-smoker	Surgical	Consultant	Jordanian Royal Medical Services	Full-Time	>1400 JDs	<40	1-3 on-calls	Yes	Yes	No	Very Often	Always	Sometimes	Sometimes	Sometimes	Sometimes	Always	Rarely	Sometimes	Sometimes	Disagree	Disagree	Neutral/Undecided	Agree	Agree
54	Female	Married	>6 Persons	Owned Falt/House	Central (Amman, Zarqa, Madaba, Al-Balqaa)	Non-smoker	Surgical	Consultant	Jordanian Royal Medical Services	Full-Time	>1400 JDs	<40	1-3 on-calls	Yes	Yes	No	Very Often	Always	Sometimes	Sometimes	Sometimes	Sometimes	Always	Rarely	Sometimes	Sometimes	Disagree	Disagree	Neutral/Undecided	Agree	Agree
40	Male	Married	1-3 Persons	Rented Falt/House	Central (Amman, Zarqa, Madaba, Al-Balqaa)	Smoker	Medical	Specialist	Private Hospitals/Clinics	Full-Time	>1400 JDs	40-48	1-3 on-calls	Yes	No	No	Sometimes	Rarely	Never	Never	Never	Never	Sometimes	Never	Sometimes	Rarely	Strongly Agree	Strongly Agree	Strongly disagree	Agree	Strongly disagree
56	Male	Married	>6 Persons	Owned Falt/House	North (Irbid, Ajloun, Jerash, Mafraq)	Non-smoker	Surgical	Consultant	University Hospitals	Full-Time	>1400 JDs	<40	0	Yes	No	No	Often	Almost Never	Never	Rarely	Rarely	Almost Never	Often	Almost Never	Often	Almost Never	Agree	Agree	Agree	Agree	Agree
52	Male	Married	4-6 Persons	Rented Falt/House	Central (Amman, Zarqa, Madaba, Al-Balqaa)	Smoker	Medical	Consultant	Private Hospitals/Clinics	Full-Time	>1400 JDs	40-48	0	Yes	No	Yes	Sometimes	Sometimes	Rarely	Rarely	Rarely	Sometimes	Sometimes	Never	Almost Never	Rarely	Strongly Agree	Agree	Disagree	Agree	Disagree
27	Male	Single	4-6 Persons	Rented Falt/House	Central (Amman, Zarqa, Madaba, Al-Balqaa)	Smoker	Surgical	Resident	University Hospitals	Full-Time	<700 JDs	40-48	1-3 on-calls	Yes	No	No	Often	Often	Sometimes	Rarely	Never	Never	Sometimes	Never	Often	Often	Agree	Agree	Disagree	Agree	Neutral/Undecided
37	Female	Married	>6 Persons	Owned Falt/House	Central (Amman, Zarqa, Madaba, Al-Balqaa)	Smoker	Medical	Specialist	Jordanian Ministry of Health	Full-Time	700-1400 JDs	40-48	1-3 on-calls	Yes	No	No	Always	Sometimes	Sometimes	Sometimes	Sometimes	Rarely	Often	Sometimes	Very Often	Sometimes	Agree	Agree	Neutral/Undecided	Agree	Neutral/Undecided
44	Female	Married	1-3 Persons	Rented Falt/House	North (Irbid, Ajloun, Jerash, Mafraq)	Smoker	Medical	Specialist	Non-Governmental Organizations	Part-Time	>1400 JDs	<40	0	Yes	No	No	Often	Rarely	Never	Never	Never	Never	Often	Never	Sometimes	Often	Agree	Neutral/Undecided	Agree	Agree	Agree
52	Female	Married	4-6 Persons	Owned Falt/House	Central (Amman, Zarqa, Madaba, Al-Balqaa)	Non-smoker	Medical	Consultant	Private Hospitals/Clinics	Full-Time	>1400 JDs	<40	1-3 on-calls	Yes	No	No	Always	Sometimes	Never	Never	Never	Never	Very Often	Never	Very Often	Sometimes	Strongly Agree	Strongly Agree	Strongly disagree	Strongly agree	Strongly disagree
33	Female	Single	4-6 Persons	Owned Falt/House	Central (Amman, Zarqa, Madaba, Al-Balqaa)	Non-smoker	Surgical	Specialist	Jordanian Royal Medical Services	Full-Time	>1400 JDs	40-48	1-3 on-calls	Yes	No	Yes	Always	Always	Sometimes	Often	Sometimes	Sometimes	Very Often	Rarely	Very Often	Very Often	Disagree	Disagree	Agree	Disagree	Agree
31	Female	Single	1-3 Persons	Rented Falt/House	Central (Amman, Zarqa, Madaba, Al-Balqaa)	Non-smoker	Medical	Resident	University Hospitals	Full-Time	<700 JDs	40-48	1-3 on-calls	Yes	No	No	Almost Never	Sometimes	Never	Never	Never	Never	Sometimes	Almost Never	Very Often	Rarely	Agree	Strongly Agree	Strongly disagree	Strongly agree	Strongly disagree
31	Male	Single	4-6 Persons	Owned Falt/House	Central (Amman, Zarqa, Madaba, Al-Balqaa)	Smoker	Surgical	Resident	University Hospitals	Full-Time	700-1400 JDs	>48	1-3 on-calls	Yes	No	No	Always	Always	Sometimes	Sometimes	Sometimes	Rarely	Very Often	Sometimes	Always	Always	Disagree	Disagree	Agree	Disagree	Agree
27	Female	Single	1-3 Persons	Rented Falt/House	Central (Amman, Zarqa, Madaba, Al-Balqaa)	Smoker	Medical	Resident	University Hospitals	Full-Time	<700 JDs	40-48	1-3 on-calls	Yes	No	No	Often	Often	Often	Often	Often	Sometimes	Often	Often	Often	Often	Neutral/undecided	Neutral/Undecided	Neutral/Undecided	Neutral/Undecided	Neutral/Undecided
42	Male	Married	1-3 Persons	Rented Falt/House	Central (Amman, Zarqa, Madaba, Al-Balqaa)	Non-smoker	Surgical	Specialist	Private Hospitals/Clinics	Full-Time	>1400 JDs	40-48	1-3 on-calls	No	No	No	Never	Almost Never	Almost Never	Almost Never	Rarely	Rarely	Rarely	Rarely	Rarely	Rarely	Neutral/undecided	Strongly Agree	Strongly Agree	Agree	Strongly agree
36	Female	Married	>6 Persons	Owned Falt/House	South (Aqapa, Karak, Maan, Tafileh)	Smoker	Medical	Specialist	Jordanian Ministry of Health	Full-Time	700-1400 JDs	<40	0	Yes	No	No	Very Often	Sometimes	Rarely	Never	Never	Sometimes	Often	Rarely	Very Often	Sometimes	Agree	Neutral/Undecided	Disagree	Agree	Disagree
30	Male	Single	4-6 Persons	Owned Falt/House	Central (Amman, Zarqa, Madaba, Al-Balqaa)	Non-smoker	Surgical	Resident	Jordanian Ministry of Health	Full-Time	<700 JDs	40-48	1-3 on-calls	No	No	Yes	Very Often	Sometimes	Sometimes	Sometimes	Rarely	Sometimes	Often	Rarely	Sometimes	Sometimes	Neutral/undecided	Neutral/Undecided	Neutral/Undecided	Neutral/Undecided	Neutral/Undecided
30	Male	Single	4-6 Persons	Owned Falt/House	Central (Amman, Zarqa, Madaba, Al-Balqaa)	Non-smoker	Surgical	Resident	Jordanian Ministry of Health	Full-Time	<700 JDs	40-48	1-3 on-calls	No	No	Yes	Very Often	Sometimes	Sometimes	Sometimes	Rarely	Sometimes	Often	Rarely	Sometimes	Sometimes	Neutral/undecided	Neutral/Undecided	Neutral/Undecided	Neutral/Undecided	Neutral/Undecided
35	Male	Married	4-6 Persons	Rented Falt/House	Central (Amman, Zarqa, Madaba, Al-Balqaa)	Non-smoker	Surgical	Specialist	Jordanian Ministry of Health	Full-Time	>1400 JDs	40-48	1-3 on-calls	Yes	No	No	Sometimes	Often	Rarely	Sometimes	Sometimes	Sometimes	Sometimes	Rarely	Sometimes	Sometimes	Neutral/undecided	Agree	Disagree	Neutral/Undecided	Neutral/Undecided
32	Female	Married	1-3 Persons	Rented Falt/House	North (Irbid, Ajloun, Jerash, Mafraq)	Non-smoker	Medical	Specialist	Private Hospitals/Clinics	Full-Time	>1400 JDs	40-48	1-3 on-calls	Yes	No	No	Very Often	Often	Rarely	Rarely	Rarely	Sometimes	Often	Never	Sometimes	Sometimes	Strongly Agree	Agree	Strongly disagree	Strongly agree	Strongly disagree
48	Male	Married	1-3 Persons	Owned Falt/House	Central (Amman, Zarqa, Madaba, Al-Balqaa)	Non-smoker	Medical	Consultant	Private Hospitals/Clinics	Full-Time	>1400 JDs	<40	0	Yes	No	No	Sometimes	Sometimes	Sometimes	Never	Never	Never	Sometimes	Sometimes	Sometimes	Sometimes	Agree	Strongly Agree	Strongly disagree	Strongly agree	Strongly disagree
41	Male	Married	>6 Persons	Owned Falt/House	Central (Amman, Zarqa, Madaba, Al-Balqaa)	Smoker	Medical	Specialist	Private Hospitals/Clinics	Part-Time	>1400 JDs	<40	0	No	No	No	Sometimes	Sometimes	Sometimes	Sometimes	Sometimes	Sometimes	Sometimes	Sometimes	Sometimes	Sometimes	Agree	Agree	Disagree	Agree	Disagree
40	Male	Married	1-3 Persons	Owned Falt/House	Central (Amman, Zarqa, Madaba, Al-Balqaa)	Smoker	Medical	Specialist	Jordanian Royal Medical Services	Part-Time	>1400 JDs	40-48	1-3 on-calls	No	No	No	Always	Often	Rarely	Rarely	Rarely	Sometimes	Very Often	Rarely	Rarely	Rarely	Agree	Neutral/Undecided	Agree	Agree	Strongly disagree
36	Male	Single	>6 Persons	Owned Falt/House	Central (Amman, Zarqa, Madaba, Al-Balqaa)	Non-smoker	Medical	Specialist	Jordanian Ministry of Health	Full-Time	>1400 JDs	40-48	>3	Yes	Yes	No	Rarely	Often	Never	Never	Never	Rarely	Sometimes	Never	Never	Rarely	Agree	Strongly Agree	Strongly disagree	Strongly agree	Strongly disagree
27	Female	Single	1-3 Persons	Owned Falt/House	South (Aqapa, Karak, Maan, Tafileh)	Non-smoker	Medical	General Practitioner	Non-Governmental Organizations	Part-Time	700-1400 JDs	<40	0	Yes	Yes	No	Rarely	Rarely	Often	Rarely	Rarely	Sometimes	Sometimes	Almost Never	Often	Sometimes	Agree	Agree	Disagree	Agree	Disagree
25	Female	Single	>6 Persons	Owned Falt/House	Central (Amman, Zarqa, Madaba, Al-Balqaa)	Smoker	Medical	General Practitioner	Private Hospitals/Clinics	Full-Time	<700 JDs	40-48	1-3 on-calls	Yes	No	No	Often	Sometimes	Rarely	Sometimes	Sometimes	Never	Never	Never	Never	Sometimes	Agree	Strongly Agree	Strongly disagree	Strongly agree	Strongly disagree
30	Male	Single	1-3 Persons	Rented Falt/House	North (Irbid, Ajloun, Jerash, Mafraq)	Smoker	Surgical	Resident	University Hospitals	Full-Time	<700 JDs	40-48	1-3 on-calls	Yes	No	No	Often	Sometimes	Rarely	Never	Never	Sometimes	Often	Never	Very Often	Always	Agree	Agree	Disagree	Agree	Disagree
36	Male	Married	1-3 Persons	Owned Falt/House	Central (Amman, Zarqa, Madaba, Al-Balqaa)	Non-smoker	Surgical	Specialist	Private Hospitals/Clinics	Full-Time	>1400 JDs	40-48	1-3 on-calls	No	No	No	Often	Always	Sometimes	Sometimes	Sometimes	Rarely	Sometimes	Rarely	Sometimes	Sometimes	Neutral/undecided	Disagree	Agree	Neutral/Undecided	Neutral/Undecided
36	Male	Married	1-3 Persons	Owned Falt/House	Central (Amman, Zarqa, Madaba, Al-Balqaa)	Non-smoker	Surgical	Specialist	Private Hospitals/Clinics	Full-Time	>1400 JDs	40-48	1-3 on-calls	No	No	No	Often	Always	Sometimes	Sometimes	Sometimes	Rarely	Sometimes	Rarely	Sometimes	Sometimes	Neutral/undecided	Disagree	Agree	Neutral/Undecided	Neutral/Undecided
55	Female	Married	4-6 Persons	Owned Falt/House	Central (Amman, Zarqa, Madaba, Al-Balqaa)	Smoker	Surgical	Consultant	Private Hospitals/Clinics	Full-Time	>1400 JDs	<40	1-3 on-calls	No	No	No	Often	Rarely	Rarely	Never	Never	Often	Often	Rarely	Often	Often	Agree	Agree	Disagree	Agree	Strongly disagree
38	Female	Married	1-3 Persons	Rented Falt/House	Central (Amman, Zarqa, Madaba, Al-Balqaa)	Non-smoker	Medical	Specialist	Private Hospitals/Clinics	Full-Time	>1400 JDs	40-48	0	No	No	No	Sometimes	Rarely	Never	Never	Never	Rarely	Sometimes	Never	Often	Sometimes	Strongly Agree	Agree	Disagree	Agree	Disagree
57	Female	Married	1-3 Persons	Owned Falt/House	Central (Amman, Zarqa, Madaba, Al-Balqaa)	Smoker	Medical	Consultant	Non-Governmental Organizations	Full-Time	>1400 JDs	40-48	1-3 on-calls	No	No	No	Very Often	Very Often	Sometimes	Sometimes	Sometimes	Sometimes	Very Often	Rarely	Very Often	Always	Disagree	Disagree	Agree	Disagree	Agree
33	Male	Single	4-6 Persons	Owned Falt/House	North (Irbid, Ajloun, Jerash, Mafraq)	Smoker	Surgical	Resident	Jordanian Ministry of Health	Full-Time	700-1400 JDs	40-48	1-3 on-calls	Yes	Yes	No	Always	Very Often	Rarely	Rarely	Never	Sometimes	Very Often	Never	Always	Sometimes	Strongly disagree	Strongly disagree	Agree	Disagree	Agree
26	Female	Single	4-6 Persons	Rented Falt/House	Central (Amman, Zarqa, Madaba, Al-Balqaa)	Smoker	Medical	Resident	University Hospitals	Full-Time	<700 JDs	40-48	1-3 on-calls	No	No	Yes	Never	Never	Never	Never	Never	Never	Never	Never	Never	Never	Strongly Agree	Strongly Agree	Strongly disagree	Strongly agree	Strongly disagree
30	Male	Single	1-3 Persons	Owned Falt/House	Central (Amman, Zarqa, Madaba, Al-Balqaa)	Smoker	Surgical	Resident	Private Hospitals/Clinics	Full-Time	<700 JDs	>48	1-3 on-calls	No	No	No	Sometimes	Sometimes	Sometimes	Sometimes	Sometimes	Sometimes	Sometimes	Sometimes	Sometimes	Sometimes	Neutral/undecided	Neutral/Undecided	Neutral/Undecided	Neutral/Undecided	Neutral/Undecided
32	Male	Married	1-3 Persons	Rented Falt/House	Central (Amman, Zarqa, Madaba, Al-Balqaa)	Non-smoker	Surgical	Resident	Private Hospitals/Clinics	Full-Time	<700 JDs	<40	1-3 on-calls	Yes	No	No	Often	Sometimes	Sometimes	Rarely	Rarely	Rarely	Almost Never	Almost Never	Sometimes	Rarely	Disagree	Disagree	Disagree	Agree	Disagree
29	Male	Married	4-6 Persons	Owned Falt/House	Central (Amman, Zarqa, Madaba, Al-Balqaa)	Non-smoker	Surgical	Resident	Private Hospitals/Clinics	Full-Time	<700 JDs	>48	1-3 on-calls	Yes	No	No	Sometimes	Sometimes	Almost Never	Very Often	Very Often	Rarely	Almost Never	Never	Rarely	Rarely	Agree	Disagree	Agree	Disagree	Agree
32	Male	Single	1-3 Persons	Rented Falt/House	Central (Amman, Zarqa, Madaba, Al-Balqaa)	Non-smoker	Medical	Resident	Private Hospitals/Clinics	Full-Time	<700 JDs	40-48	1-3 on-calls	Yes	No	No	Sometimes	Sometimes	Often	Sometimes	Always	Rarely	Sometimes	Never	Often	Sometimes	Neutral/undecided	Neutral/Undecided	Neutral/Undecided	Agree	Strongly disagree
33	Male	Married	1-3 Persons	Owned Falt/House	Central (Amman, Zarqa, Madaba, Al-Balqaa)	Smoker	Medical	Specialist	Private Hospitals/Clinics	Full-Time	>1400 JDs	>48	1-3 on-calls	No	No	Yes	Always	Always	Always	Always	Always	Always	Very Often	Very Often	Often	Often	Agree	Disagree	Agree	Disagree	Agree
31	Male	Married	>6 Persons	Owned Falt/House	Central (Amman, Zarqa, Madaba, Al-Balqaa)	Non-smoker	Medical	Specialist	Jordanian Ministry of Health	Full-Time	>1400 JDs	>48	1-3 on-calls	No	No	No	Very Often	Always	Always	Always	Often	Always	Rarely	Sometimes	Sometimes	Very Often	Disagree	Neutral/Undecided	Neutral/Undecided	Strongly disagree	Agree
35	Male	Married	1-3 Persons	Rented Falt/House	Central (Amman, Zarqa, Madaba, Al-Balqaa)	Non-smoker	Surgical	Specialist	Non-Governmental Organizations	Full-Time	>1400 JDs	>48	>3	Yes	Yes	No	Always	Sometimes	Rarely	Rarely	Rarely	Rarely	Rarely	Rarely	Sometimes	Rarely	Agree	Agree	Agree	Agree	Disagree
34	Male	Married	1-3 Persons	Rented Falt/House	Central (Amman, Zarqa, Madaba, Al-Balqaa)	Non-smoker	Surgical	Specialist	Private Hospitals/Clinics	Full-Time	>1400 JDs	40-48	>3	Yes	No	No	Very Often	Always	Very Often	Very Often	Very Often	Very Often	Sometimes	Sometimes	Almost Never	Very Often	Neutral/undecided	Neutral/Undecided	Neutral/Undecided	Neutral/Undecided	Disagree
26	Male	Single	4-6 Persons	Owned Falt/House	Central (Amman, Zarqa, Madaba, Al-Balqaa)	Non-smoker	Surgical	Resident	Private Hospitals/Clinics	Full-Time	<700 JDs	>48	1-3 on-calls	Yes	No	Yes	Very Often	Very Often	Sometimes	Often	Almost Never	Often	Sometimes	Almost Never	Very Often	Often	Disagree	Disagree	Agree	Neutral/Undecided	Agree
28	Male	Married	1-3 Persons	Rented Falt/House	Central (Amman, Zarqa, Madaba, Al-Balqaa)	Non-smoker	Surgical	Resident	Private Hospitals/Clinics	Full-Time	<700 JDs	>48	1-3 on-calls	No	No	No	Very Often	Often	Always	Very Often	Sometimes	Often	Often	Rarely	Often	Sometimes	Neutral/undecided	Neutral/Undecided	Neutral/Undecided	Disagree	Neutral/Undecided
